# Supplementary material for: Altered temporal sequence of transcriptional regulators in the generation of human cerebellar granule cells
Source: eLife. 2021 Nov 29;10:e67074. doi: 10.7554/eLife.67074 (PMC8687658; doi:10.7554/eLife.67074)
Supplement: Figure 4—figure supplement 2—source data 1. [file elife-67074-fig4-figsupp2-data1.xlsx]

## Sheet: Sheet1
Comparison of ATOH1-EGFP TRAP data versus scRNA-seq from Wizeman et al. 2019
category	over_represented_pvalue	under_represented_pvalue	numDEInCat	numInCat	Test_Genes_In_Category
Glutamatergic_IsN	6.21e-16	1	121	276	Ppp1r17;Igfbpl1;Robo3;Tubb3;Tmem163;En1;Nhlh2;Klhl35;Tagln3;Necab3;Sox11;Elavl4;Podxl2;Gng3;Tubb2b;Meis2;Ebf2;Irx3;H3f3b;Efna3;Camk2n1;Nkain4;Tubb4a;Hist3h2a;Stmn2;Dctn3;Rundc3a;Cdkn1c;Rbfox1;Thsd7a;Tmeff1;Cntn2;Ina;Gdi1;Rtn1;Rmst;Ccdc28b;Cirbp;Uncx;Mllt11;Aplp1;Atp6v0b;Gabarap;Pou2f2;Lix1;Nsg1;Ypel3;Elavl3;Pfn2;Gse1;Adcyap1;Fam57b;Ralgps2;Ubald2;Zmiz1;Fam110a;Scrt2;Shd;Nhlh1;Cnih2;Crabp2;Ube2b;P…
Glutamatergic_RL1	1.98e-12	1	127	314	Gadd45g;Atoh1;Hes6;Rps19;Rps14;Rps5;Rplp0;Rpl32;Rpl13;Rps9;Rpl37;Rpl37a;Zfp36l1;Rpl13a;Cd63;Rpl4;Fst;Rpl14;Rps3;Rpl41;Dll1;Rhob;Rps11;Rps26;Rpl23;Ifitm2;Brd7;Rps15a;Naca;Eef1g;Rplp2;Mdk;Rps10;Rps8;Tmsb4x;Hspe1;Pabpc1;Eef1a1;Rps24;Mfng;Eif3f;Rps28;Btg2;Rps15;Cbfa2t3;Rplp1;Rps20;Rpl39;Mycl;Gpm6b;Rpl22;Eif3k;Rps21;Lrrn2;Rpsa;Polr2h;Sp5;Loxl1;Hsd11b2;Fam162a;Gtf3c6;Etfb;Hspb1;Gadd45gip1;Mycn;Tomm7;Ez…
Glutamatergic_mCN	1.51e-10	1	179	527	Lmx1a;Tmem158;Tmsb10;Ina;Nefm;Vstm2l;Stmn4;Pcp4;Mllt11;Mgst3;Cnih2;Gng3;Stmn2;Tubb2b;Rtn1;Crmp1;Calm1;Tubb3;Meis2;Mgat5;Aplp1;Snrpn;Nsg1;Tubb4a;Ckb;Evl;Marcksl1;Ptms;Neurod2;Gap43;Dpysl3;Tshz1;Tmeff2;Cirbp;Actl6b;Tmsb4x;Pafah1b3;Ebf2;Chchd10;Gdi1;Fabp3;Dynlrb1;Irx2;Elavl2;Mien1;Gnb2;Vamp2;Ap1s2;Cox5a;Ube2e3;Dcx;Tmem163;Dpysl5;Gdap1l1;Atp6v0b;Hist3h2a;Nrxn2;Tagln3;Elavl3;Nfkbie;Svbp;Ndufa4;Cox6a1;…
Glutamatergic_RL2	1.42e-09	1	60	126	Cd63;Atoh1;Barhl1;Rpl32;Mycl;Rpl37;Hes6;Rps9;Rps19;Rpl13a;Rps15a;Rps14;Rps26;Rps11;Rpl23;Rps5;Nrn1;Rpl14;Rplp2;Naca;Sp5;Rps15;Snrpg;Spsb4;Hspe1;Rpl22;Mrfap1;Eef1g;Pax6;Rps21;Rcor2;Mycn;Hsd11b2;Rpl39;Lrrn2;Abracl;Snrpb2;Nop10;Rps27l;Hmgn3;Lsm5;Rpl35;Eif3e;Uncx;Gamt;Hebp1;Rpl27a;Mfng;Mrpl38;Aprt;Nhp2;Ssr2;Hpcal1;Lsm4;Immp1l;Cdc26;Fst;Sstr2;Btg2;Znrd1
Glutamatergic_GC	2.5e-08	1	136	399	Gap43;Tubb3;Stmn2;Neurod1;Fam84a;Calm1;Gng3;Mllt11;Rtn1;Stmn4;Tubb2b;Nefm;Mgst3;Ina;Tmsb10;Ttc9b;Cnih2;Tagln3;Tmsb4x;Gdi1;Cd47;Tubb4a;Nhlh1;Aplp1;Hist3h2a;Dcx;Ckb;Ank3;Crmp1;Atp6v0b;Cited2;Snrpn;Calm2;Elavl3;Marcksl1;Celf3;Ndst3;Neurod2;Evl;Adcyap1;Kcnk1;Sox4;Glipr2;Pafah1b3;Ap1s2;Podxl2;Syt1;Cplx2;Kif5c;Cirbp;Gpm6a;Ddah2;Ptms;Nsg1;Crabp2;Nhlh2;Vamp2;Lmx1a;Syngr3;Gdpd1;Cystm1;Cib2;Jund;Plppr3;Klh…
Glutamatergic_lCN	4.58e-08	1	143	427	Tubb2b;Mllt11;Rtn1;Tmsb10;Ina;Ly6h;Cnih2;Cirbp;Snrpn;Nsg1;Fez1;Evl;Aplp1;Crmp1;Tubb3;Actl6b;Gng3;Stmn2;Stmn4;Pfn2;Pafah1b3;Chst8;Sox4;Gdi1;Dpysl3;Chl1;Glra2;Ptms;Zfhx3;Rbfox1;Podxl2;Fam57b;Meis2;Fabp3;Tecr;Tmem163;Atp6v0b;Bend5;Vamp2;Cmas;Hist3h2a;Bex2;Dcx;Cdkn1c;Sox11;Slc25a4;Nova1;Trappc4;Ndufa4;Arl6ip5;Ccdc184;Rab3c;Rundc3a;Sh3yl1;Tmem158;Nrxn2;Ube2ql1;Rtn3;Hsbp1;Tmem74b;Ndufa11;Ccdc28b;Svbp;C…
Glutamatergic_C1	4.93e-07	1	171	538	Wnt1;Cntnap2;Msx1;Dbi;Fabp7;Rspo1;Tpbg;Id1;Mdk;Rnd1;Fzd10;Otx2;Mif;Ncald;Hes5;Clu;Zfp36l1;Arl4a;Slc9a3r1;Rbp1;Atp1b1;Id2;Mgst1;Siva1;Wnt3a;Ifitm2;Hmgb2;Ranbp1;Rpl41;Rxrg;Rpl14;Hmga2;Rplp0;Rpl13;Rps19;Rfx4;Ttyh1;Ndrg2;Rpl32;Eef1d;Efcc1;H1fx;Isyna1;Ppp1r1a;Ildr2;Dctpp1;Gins2;H2afz;Hmgn1;Rps15;Vamp8;Slit2;Hspe1;Dnajc9;Pmf1;Srsf9;Sox2;Rps9;Hmgn3;Rpl4;Wwc1;Ccdc34;Msi1;Dtx4;Mycn;Gdpd2;Rps10;Rps3;Smco4;…
Glutamatergic_GC1	6.58e-05	0.999966	66	189	Neurod1;Gap43;Sept4;Cd9;Nhlh1;Ddah2;Stmn2;Hpcal1;Dapl1;Elavl3;Nrn1;Pax6;Rwdd3;Fam84a;Igfbpl1;Barhl1;Sox4;Sstr2;Cited2;Spsb4;Tmsb4x;Hs3st1;Ly6e;Ckb;Cplx2;Lingo1;Elavl2;Gamt;Stmn4;Pkib;H1f0;Ddit3;Gpm6a;Kcnk1;Tmem41a;Tagln3;Ttc9b;Rcor2;Glipr2;Pcbp4;Plk3;Ntrk2;Tmem176b;Prkag2;Mrpl34;Insm1;Elavl4;Celf3;Zbtb18;Aprt;Fdps;Vat1;Arpc3;Rheb;Rab6b;Ucp2;Tpd52;Srrm4;Gdap1l1;Pfdn4;Necab3;Chd7;Tppp3;Cstb;Crip1;B…
Glutamatergic_Mes	0.0112088	0.991742	121	448	Isl1;Pou6f2;Crabp1;Shox2;Sncg;Bmp7;Ptgds;Onecut2;Cntnap2;Chga;Prkcb;Ppp1r17;Lgals1;Tlx3;Gas6;Zfhx3;Meis3;Crip1;Fxyd7;Ly6h;Kazn;Nrxn2;Vstm2b;Cystm1;Gpm6a;Pou4f1;Fam131c;Elavl4;Gpr12;Stmn4;Fmnl2;Cadm3;En1;Tubb3;Fkbp1b;Card19;Stmn2;Rims3;Trim45;Tppp3;Prph;Olfm1;Kif5c;Cdkn1c;Bbc3;Atp6v0b;Mgst3;Plppr3;Emc9;Neurog2;Nsg1;Erlin2;Rtn1;Mllt11;Aplp1;Ccdc136;Gng3;Tecr;Agrn;Ccdc85b;Stx1a;Ina;Cnih2;Rnf19a;Trim…
Glutamatergic_RL4	0.739303	0.30532	78	354	Hmgb2;Pttg1;Arl6ip1;Cks1b;H2afz;Pmf1;Cdkn3;Cdc25b;Ptma;Ccdc34;Calm2;H1f0;H1fx;Dnajc9;Mis18a;Cenpw;Hes6;Rdm1;Nucks1;Nudcd2;Insm1;Ska2;Hmgn1;Terf1;H3f3b;Sp5;Dek;Cd9;Barhl1;Pax6;Smco4;Cmc2;Lsm3;Nap1l1;Exosc8;Ddah2;Cd63;Ubald2;Atoh1;Hist1h2ae;Csrp2;Banf1;Psip1;Lsm6;Nsmce4a;Lsm8;Ezr;Fam110a;Dut;Nt5dc2;Rhno1;Lrrn2;Arl4a;Nrn1;Prim1;Cdkn2d;Gja1;Hmgn3;Lsm2;Fkbp2;Lsm5;Ssbp1;Mrpl51;Snrnp40;Mgst1;Med30;Ppih;…
Glutamatergic_RL3	0.812911	0.219721	104	476	Dut;Ranbp1;Dnajc9;Cd63;Dek;Siva1;Ptma;Gins2;Atoh1;Dctpp1;Hmgb2;Rnaseh2a;H2afz;Hes6;Prim1;Rfc2;Fst;Cks1b;Sp5;Lsm2;Mlf1;Nsmce4a;Mdk;Mad2l2;Rps5;Cdk4;Rpl14;Nrm;Gadd45g;Snrpg;Pold2;Dtymk;Rplp0;Pmf1;Pabpc1;Exosc7;Arl6ip6;Exosc8;Dnaaf2;Cfap77;Lsm8;Snrnp40;Ppil1;Lsm3;Nap1l1;Psip1;Barhl1;Cenpw;Exosc5;Rps24;Eef1d;Zfp36l1;Snrpd2;Tsen15;Mrfap1;Mis18a;U2af1;Nxt1;Hspe1;Nhp2;Enkd1;Tmem107;Rpsa;Rpa3;Hist1h2ae;N…
GABAergic_GABA.p2	3.27e-12	1	274	841	Neurog1;Neurog2;Cdkn1c;Gadd45g;Nhlh1;Kirrel2;Btg2;Tmsb4x;Ptx3;Hes6;Klhl35;Cdk4;Mdk;Cd63;Gpm6b;Dpysl4;Fabp7;Fam110a;Rps3;Rps5;Gamt;Rps14;Rplp0;Nhlh2;Rnd2;Rpl32;Sox11;Tpbg;Rps19;Bcl7a;Igfbpl1;Pax6;Rps11;Irx2;Rps9;Neurod1;Smoc1;Elavl4;Rpl4;Nkain4;Tcf15;Plk3;Rps15a;Acads;Spsb4;Insm1;Irx3;Mgst1;Eef1a1;Rpl37;Mycl;Ddr1;Rpl23;Ascl1;Rpl13a;Rpl37a;Rpl13;Rps10;Gng5;Neurod2;Tox3;Chd7;Zbtb18;Hes5;Tmem123;Msi1…
GABAergic_GABA.pre	2.13e-06	0.999999	68	178	Klhl35;Nhlh2;Igfbpl1;Tubb3;Crabp2;Nhlh1;Robo3;Csrp1;Rnd2;Olig3;Uncx;Elavl4;Mxra7;Enox2;Nkain4;Dynll1;Cdkn1c;Ddah2;Tppp3;Sox11;Gadd45g;Cited2;Ddr1;Ptma;Psma7;Stmn2;Tagln3;Zic1;H1f0;Vat1;Cdk4;Calm2;Cd63;Neurod2;Spsb4;Ecel1;Cntn2;Atp1b1;Prr13;Hsd11b2;Tmem176b;Hmgn1;Rcor2;Insm1;Btbd17;Fam110a;Sdf2l1;Irx2;Nt5dc2;Ebf2;Tox3;Chd7;Bcl7a;Elavl3;Capns1;Bbc3;Ift43;Epb41l4a;Kcnn1;Tmeff1;Manf;Ube2r2;Unc119;Ank…
GABAergic_GABA.IN	0.00125769	0.999389	38	107	Lamp5;Neurod1;Neurod2;Camk2n1;Igfbpl1;Nhlh2;Nhlh1;Glra2;Gadd45g;Pbx3;Id2;Robo3;Ppp1r14a;Slc32a1;Spsb4;Necab3;Rbfox1;Rbfox3;Clvs1;Cited2;Ube2e3;Elavl4;Nkain4;Pdlim7;Hsd11b2;Klhl35;Satb1;Cdkn1c;Tox3;Ap1s2;Bcl7a;Gpm6b;Nt5dc2;Prkcb;Mxra7;Rab6b;Tmem158;Fam110a
GABAergic_PC4.Foxp1	0.00332244	0.99809	51	160	Lypd1;Vstm2b;Tmsb10;Tmeff2;Rbp1;Ly6h;Gap43;Sox4;Nefm;Slit2;Nsg1;Nrsn1;Snrpn;Ina;Id2;Cirbp;Evl;Mllt11;Lrrtm1;Fam131c;Stmn4;Arl6ip5;Chl1;Fam57b;Mif;Uncx;Ndufv3;Nenf;Tmem158;Aplp1;Fam84a;Bex1;Syngr3;Pianp;Svbp;Cd47;Cplx1;Dad1;Sdhaf4;Kif5c;Ppil1;Ccdc107;Dtnbp1;Rgs10;Ctnnd2;Slain1;Nrxn2;Hddc3;Tspan7;Tceal5;Pbx1
GABAergic_PC3.En1	0.0250922	0.988491	17	48	Nhlh2;Calm1;Fdps;Robo3;Thsd7a;Crabp2;Podxl2;Olfm1;Prkcb;Fez1;Zic1;March1;Ebf2;Pfdn4;Tubb4a;Cntn2;Chrna3
GABAergic_PC2.Nrgn	0.0759014	0.962788	13	40	En1;Gap43;Slc32a1;Cnih2;Pcp4;Cnpy1;Ube2ql1;Lmo4;Ebf2;Csrp2;Nefm;Ntrk2;Efnb3
GABAergic_PC1.Etv1	0.226576	0.853437	16	58	Nr2f1;Olfm1;Plpp4;Nr2f2;Stmn4;Zic1;Mif;Vstm2l;Ncald;Ssbp4;Csrp2;Hs3st1;Ifitm2;Syt1;Cntnap2;Ppp1r1a
GABAergic_PC5.Cck	0.34257	0.746043	21	84	Cd47;Tmsb10;Sphk1;Pcp4;Ppp1r1a;Ly6h;Podxl2;Ndufa4;Cnih2;Cirbp;Ebf2;Vstm2l;Nefm;Evl;Snrpn;Cystm1;Fabp3;Arl4a;Bex1;Syngr3;Cplx1
AllCells_BG-like	0.160945	0.862567	150	611	Aldoc;Ndrg2;Ednrb;Ntrk2;Luzp2;Hes5;Ttyh1;Nrarp;Fgfbp3;Cd9;Ptprz1;Mgst1;Cdo1;Cntfr;Sox2;Hs3st1;Dbi;Nkain4;Tspan7;Agrn;Apoe;Zfp36l1;Psph;Gpm6b;Irx3;Fabp7;Mdk;Ddt;Sirt2;Smoc1;Hmgn3;Slc9a3r1;Unc119;Marcks;Ppp1r1a;Wscd1;Emid1;Etfb;Litaf;Kcnmb4;Fam181a;Gdpd2;Rnf13;Fez1;Tmem55a;Id2;Ost4;Tmem237;Eef1d;Hibadh;Ormdl2;Ech1;Chmp4b;Gng5;Siva1;Asrgl1;Spcs1;Cyb5a;Btbd17;Lsm6;Fam213a;Hebp1;Cnpy1;Atraid;Ezr;Bbip1…
AllCells_Erythrocyte	0.253025	0.848759	11	38	Hebp1;Lgals1;Tspo;Pnpo;Vamp8;Chchd10;Neat1;Apoe;Gatm;Pycard;S100a13
AllCells_BloodCell	0.872467	0.332179	2	14	Bnip3l;Gpx1
AllCells_Pericyte	0.980599	0.0251303	114	578	Eva1b;Myl9;Ifitm3;Abcc9;Crip1;Pdlim2;Sept4;Igf2;Lgals1;Cd63;H19;Copz2;Rcn3;Nrarp;Ecscr;Ramp2;Slc9a3r2;Zfp36l1;Slc9a3r1;Ost4;Ech1;Rbp1;Oaz2;Fam212a;Etfb;Bad;Sri;Mdk;Gstk1;Agrn;Ak3;Apoe;Bcl2l12;Capns1;Sptbn1;Ndufs7;Marcks;Glipr2;Vkorc1;Cdc42ep5;Ifitm2;Vamp8;Ngfr;Tmem176a;Gatm;Manf;Ccdc12;Bloc1s1;Nkd2;Pde5a;Hebp2;Uqcrh;Siva1;Zswim7;Pde8b;Csk;Gamt;Rpl22;Tpm2;Cstb;Litaf;Axl;Ndufa5;Krtcap2;Tspo;Uqcr10;…
AllCells_Endothelium	1	0	218	1409	Cldn5;Ramp2;Ecscr;Eva1b;Kank3;Lsr;Vamp5;Spock2;Gatm;N4bp3;Hebp1;Slc9a3r2;Sptbn1;Nrarp;Mfng;Agrn;Vamp8;Nfkbia;Apoe;Gng5;Sec11c;Ccdc85b;Tmem204;Pop5;Csrp2;Card19;Pdgfb;Rgcc;Abhd17a;S100a13;Arl4a;Adm;Wasf2;Col18a1;Klf13;Uqcc3;Mapk3;Fam212a;Zfp36l1;Heg1;Cracr2b;Rras;Tspan4;Hspg2;Homer3;Myl6;Ifitm3;Tshz2;Mpg;Sri;Litaf;Gas6;Pgp;Cd9;Dram2;Rabac1;Cdc26;Tmem176b;Rpl27a;Use1;Csrp1;Mydgf;Ptpn18;Stap2;Naa38;…
Abbreviations:
IsN = isthmic nuclear neurons
RL1 = rhombic lip domain 1
mCN = medial cerebellar nuclei
RL2 = rhombic lip domain 2
GC = granule cells
lCN = lateral cerebellar nuclei
C1 = defined as cells that arise adjacent to the roof plate and expresses Atoh1
GC1 = granule cells
Mes = mesencephalon
RL4 = rhombic lip domain 4
RL3 = rhombic lip domain 3
GABA. P2 = GABAergic precursors
GABA.pre = GABAergic precursors
GABA.IN = GABAergic interneurons
PC4.Foxp1 = Purkinje cells defined by Foxp1 expression
PC3.EN1 = Purkinje cells defined by EN1 expression
PC2.Nrgn = Purkinje cells defined by Nrgn expression
PC1.Etv1 = Purkinje cells defined by Etv1 expression
PC5.Cck = Purkinje cells defined by Cck expression
BG-like = Bergmann glia like
