# Supplementary material for: Altered temporal sequence of transcriptional regulators in the generation of human cerebellar granule cells
Source: eLife. 2021 Nov 29;10:e67074. doi: 10.7554/eLife.67074 (PMC8687658; doi:10.7554/eLife.67074)
Supplement: Figure 4—source data 1. [file elife-67074-fig4-data1.xlsx]

## Sheet: DESeq2
Differentially expressed genes in ATOH1-EGFP TRAP IP versus input
Gene ID	Gene name	baseMean	log2FoldChange	lfcSE	stat	pvalue	padj
4318	MMP9	3110	-8.12812	0.275466	-29.5068	2.35664e-191	3.892e-187
55502	HES6	35769.1	5.84699	0.212497	27.5157	1.14035e-166	9.41641e-163
347252	IGFBPL1	11338	5.28027	0.195774	26.9713	3.20958e-160	1.76688e-156
1381	CRABP1	175865	4.18147	0.158562	26.3712	2.93205e-153	1.21057e-149
10683	DLL3	8509.58	4.67091	0.183485	25.4567	5.94974e-143	1.9652e-139
50964	SOST	5202.95	5.07939	0.209939	24.1946	2.53443e-129	6.97601e-126
29114	TAGLN3	13149.2	3.83438	0.173249	22.1322	1.54745e-108	3.65088e-105
3642	INSM1	3336.27	5.0858	0.234824	21.6579	5.11903e-104	1.05676e-100
4071	TM4SF1	7997.11	-4.19514	0.194079	-21.6157	1.27966e-103	2.34817e-100
64123	ADGRL4	10293.6	-3.40978	0.162613	-20.9687	1.26646e-97	2.09156e-94
3219	HOXB9	3111.56	6.32158	0.315943	20.0086	4.63551e-89	6.95958e-86
1592	CYP26A1	10126.4	3.53968	0.181338	19.5198	7.4468e-85	1.02487e-81
1465	CSRP1	2289.26	5.56511	0.292699	19.0131	1.3294e-80	1.68884e-77
84870	RSPO3	17535.8	3.51916	0.186027	18.9174	8.19574e-80	9.66805e-77
1136	CHRNA3	1588.41	6.2354	0.33053	18.8648	2.21901e-79	2.44313e-76
1278	COL1A2	159522	-2.86962	0.155062	-18.5063	1.83777e-76	1.89692e-73
4915	NTRK2	7161.17	3.41217	0.187642	18.1845	6.84715e-74	6.6518e-71
1404	HAPLN1	11792.9	-3.12661	0.174565	-17.9109	9.69843e-72	8.89831e-69
5947	RBP1	5045.06	3.84544	0.216933	17.7264	2.62263e-70	2.27962e-67
255738	PCSK9	5991.39	-3.72042	0.209945	-17.7209	2.89376e-70	2.38952e-67
3371	TNC	20029.1	-2.82638	0.160886	-17.5676	4.3615e-69	3.43001e-66
55689	YEATS2	23169.7	4.00349	0.229122	17.4732	2.29408e-68	1.72212e-65
4023	LPL	6932.41	-3.33229	0.192649	-17.2972	4.9341e-67	3.5429e-64
1030	CDKN2B	2410.54	-4.11864	0.23987	-17.1703	4.43434e-66	3.05138e-63
5121	PCP4	1862.25	5.54503	0.328471	16.8813	6.176e-64	4.07987e-61
100463486	MTRNR2L8	47712.4	-2.48477	0.152524	-16.2909	1.14468e-59	7.27092e-57
117166	WFIKKN1	1789.71	5.28131	0.324299	16.2853	1.25477e-59	7.67503e-57
1297	COL9A1	2125.4	-3.84329	0.237627	-16.1736	7.74365e-59	4.56737e-56
4807	NHLH1	1490.88	6.2924	0.396229	15.8807	8.61925e-57	4.90851e-54
143282	FGFBP3	22760	2.39035	0.151093	15.8204	2.25189e-56	1.23967e-53
6900	CNTN2	2045.23	4.58589	0.291897	15.7107	1.27826e-55	6.80982e-53
1281	COL3A1	172604	-2.80136	0.179497	-15.6067	6.54967e-55	3.38024e-52
7471	WNT1	1864.22	7.4928	0.481016	15.577	1.04288e-54	5.21914e-52
3672	ITGA1	3882.22	-2.98027	0.191462	-15.5658	1.24291e-54	6.03724e-52
2335	FN1	26057.7	-2.4429	0.157465	-15.5139	2.7925e-54	1.31766e-51
214	ALCAM	8093.51	-2.91962	0.18928	-15.4249	1.11374e-53	5.10929e-51
5454	POU3F2	1840.31	4.30985	0.279495	15.4201	1.19867e-53	5.35026e-51
5919	RARRES2	1919.09	4.01598	0.266667	15.0599	2.97242e-51	1.29183e-48
51142	CHCHD2	7971.6	11.1765	0.743549	15.0313	4.58046e-51	1.93965e-48
3205	HOXA9	2170.27	8.29819	0.553979	14.9792	1.00362e-50	4.1437e-48
100462981	MTRNR2L2	28701	-2.37798	0.159047	-14.9514	1.52497e-50	6.14267e-48
3037	HAS2	1125.75	-6.13165	0.411884	-14.8868	4.01326e-50	1.57807e-47
2119	ETV5	3489.23	-2.89201	0.194337	-14.8814	4.35074e-50	1.67099e-47
10842	PPP1R17	1582.26	4.36821	0.294917	14.8116	1.23179e-49	4.62342e-47
1314	COPA	10533.6	-2.42449	0.166226	-14.5855	3.47119e-48	1.27393e-45
1213	CLTC	8910.05	-2.65655	0.183059	-14.512	1.01739e-47	3.65265e-45
6752	SSTR2	6095.06	3.54928	0.245069	14.4828	1.55639e-47	5.46889e-45
81848	SPRY4	1792.44	-3.55866	0.24692	-14.4122	4.33606e-47	1.49188e-44
3212	HOXB2	4357.61	2.90957	0.202611	14.3604	9.16933e-47	3.02863e-44
1004	CDH6	15289.8	-2.24176	0.1561	-14.3611	9.08045e-47	3.02863e-44
51673	TPPP3	1884.64	4.30325	0.301077	14.2929	2.42411e-46	7.84984e-44
1362	CPD	5857.73	-2.54585	0.17957	-14.1774	1.26381e-45	4.01381e-43
2118	ETV4	2858.08	-3.0938	0.218621	-14.1514	1.83048e-45	5.70384e-43
3912	LAMB1	8163.29	-2.53549	0.179689	-14.1104	3.27511e-45	1.00164e-42
6387	CXCL12	3814.11	2.87512	0.204886	14.0328	9.82339e-45	2.9497e-42
6490	PMEL	4156.77	2.8323	0.202058	14.0173	1.22252e-44	3.60533e-42
5376	PMP22	12851.2	-2.21068	0.15814	-13.9793	2.08482e-44	6.0405e-42
134111	UBE2QL1	4337.4	2.96208	0.2133	13.887	7.59966e-44	2.16394e-41
4330	MN1	6550.8	2.68226	0.193417	13.8677	9.94165e-44	2.78282e-41
7153	TOP2A	6557.57	-2.34649	0.170427	-13.7683	3.95382e-43	1.08829e-40
4148	MATN3	3115.86	-3.62703	0.264868	-13.6937	1.10694e-42	2.99691e-40
400043	LINC02381	1242.97	5.39671	0.394428	13.6824	1.29434e-42	3.42918e-40
54361	WNT4	1532.04	4.73494	0.346081	13.6816	1.30813e-42	3.42918e-40
56961	SHD	1441.92	4.58128	0.335264	13.6647	1.64931e-42	4.256e-40
151354	FAM84A	2131	3.51067	0.257618	13.6274	2.75227e-42	6.99288e-40
1152	CKB	7727.18	2.40338	0.179777	13.3687	9.21597e-41	2.2767e-38
100462977	MTRNR2L1	18415.1	-2.11571	0.158261	-13.3685	9.23639e-41	2.2767e-38
11178	LZTS1	3933.69	-2.68066	0.20062	-13.3619	1.00983e-40	2.45256e-38
10205	MPZL2	706.85	-5.80163	0.43473	-13.3454	1.26027e-40	3.01644e-38
3915	LAMC1	7909.53	-2.34081	0.176038	-13.2972	2.40279e-40	5.66886e-38
4478	MSN	7791.43	-2.31786	0.174901	-13.2524	4.36895e-40	1.01624e-37
1462	VCAN	9052.4	-2.33303	0.176224	-13.239	5.22187e-40	1.19777e-37
56100	PCDHGB6	5879.87	-2.68538	0.203316	-13.2079	7.89943e-40	1.78711e-37
5992	RFX4	1401.82	4.67532	0.354807	13.1771	1.18945e-39	2.65456e-37
147495	APCDD1	28444.4	2.57731	0.19602	13.1482	1.74312e-39	3.83835e-37
3815	KIT	2445.77	-3.03017	0.230755	-13.1315	2.17223e-39	4.72031e-37
4982	TNFRSF11B	1987.22	-3.00923	0.229637	-13.1043	3.11004e-39	6.67042e-37
100463482	MTRNR2L6	4450.32	-2.40055	0.183576	-13.0766	4.48165e-39	9.48904e-37
4192	MDK	59334.6	1.91277	0.146344	13.0704	4.86154e-39	1.01631e-36
9452	ITM2A	5407.98	-3.13461	0.240408	-13.0387	7.36961e-39	1.52136e-36
23199	GSE1	3577.43	3.76992	0.290643	12.971	1.78728e-38	3.64407e-36
10484	SEC23A	9959.46	-2.37229	0.185009	-12.8225	1.22661e-37	2.47043e-35
6574	SLC20A1	7468.26	-2.13913	0.167058	-12.8047	1.54267e-37	3.06955e-35
108	ADCY2	3663.25	3.16315	0.247703	12.7699	2.41327e-37	4.74466e-35
256691	MAMDC2	869.997	-3.83212	0.300201	-12.7652	2.56637e-37	4.98631e-35
6513	SLC2A1	2849.79	-2.81414	0.221657	-12.6959	6.22792e-37	1.19598e-34
387758	FIBIN	3545.29	-2.80403	0.2215	-12.6593	9.94174e-37	1.88722e-34
4487	MSX1	14045.9	2.6856	0.212536	12.6359	1.33803e-36	2.51109e-34
128414	NKAIN4	3418.98	3.42527	0.274385	12.4834	9.19625e-36	1.70647e-33
1848	DUSP6	11578.4	-2.23767	0.17993	-12.4364	1.65874e-35	3.04379e-33
55365	TMEM176A	1212.35	6.13082	0.493098	12.4333	1.72435e-35	3.1294e-33
6567	SLC16A2	7667.93	2.26758	0.185807	12.2039	2.96218e-34	5.31743e-32
7135	TNNI1	5128.64	2.63809	0.217144	12.149	5.80723e-34	1.03125e-31
474	ATOH1	1086.15	7.49108	0.619315	12.0958	1.1122e-33	1.95404e-31
22801	ITGA11	5147.54	-2.15008	0.179295	-11.9919	3.91967e-33	6.81404e-31
167826	OLIG3	1062.56	6.80573	0.570208	11.9355	7.72666e-33	1.32923e-30
3225	HOXC9	883.171	6.8285	0.572479	11.9279	8.46403e-33	1.44107e-30
5352	PLOD2	2717.99	-2.49831	0.209758	-11.9104	1.04464e-32	1.76043e-30
54756	IL17RD	1832.54	-2.6971	0.22656	-11.9045	1.12096e-32	1.86996e-30
89780	WNT3A	944.392	5.64168	0.475218	11.8718	1.65921e-32	2.74018e-30
1143	CHRNB4	766.454	5.3408	0.449908	11.8709	1.67739e-32	2.74279e-30
375790	AGRN	5832.72	2.4547	0.207229	11.8453	2.27485e-32	3.68324e-30
4325	MMP16	1602.99	-2.83199	0.239335	-11.8328	2.64258e-32	4.23712e-30
28514	DLL1	821.231	4.27389	0.362485	11.7905	4.36802e-32	6.93634e-30
10912	GADD45G	1402.37	3.88251	0.329808	11.772	5.43998e-32	8.55631e-30
1833	EPYC	396.298	-5.37641	0.456824	-11.7691	5.63083e-32	8.77293e-30
6657	SOX2	1433.61	3.45876	0.29401	11.7641	5.97607e-32	9.22381e-30
3423	IDS	5892.72	-2.03831	0.173464	-11.7507	7.00697e-32	1.07148e-29
79937	CNTNAP3	1821.18	-2.98474	0.254672	-11.72	1.00713e-31	1.52594e-29
7480	WNT10B	824.225	5.30563	0.453788	11.6919	1.40272e-31	2.10599e-29
51599	LSR	1762.1	2.88233	0.248647	11.592	4.52256e-31	6.72883e-29
100463285	MTRNR2L4	1530.28	-2.87147	0.248399	-11.5599	6.5779e-31	9.69947e-29
1272	CNTN1	1889.16	-3.77002	0.327703	-11.5044	1.2541e-30	1.83287e-28
285148	IAH1	1881.23	2.86602	0.249591	11.4829	1.60803e-30	2.32953e-28
5168	ENPP2	2062.37	-2.64985	0.230876	-11.4774	1.71429e-30	2.46187e-28
28959	TMEM176B	818.353	5.84485	0.510553	11.4481	2.40412e-30	3.42277e-28
9227	LRAT	777.586	4.9459	0.434078	11.394	4.47752e-30	6.3202e-28
57575	PCDH10	1245.77	-3.07218	0.270916	-11.34	8.31789e-30	1.16415e-27
84707	BEX2	7445.21	1.97776	0.174619	11.3261	9.74172e-30	1.35197e-27
284654	RSPO1	1224.59	4.10961	0.36495	11.2608	2.05004e-29	2.82137e-27
2049	EPHB3	2985.08	-2.27647	0.202303	-11.2528	2.24444e-29	3.06338e-27
9590	AKAP12	9498.45	-1.95984	0.174259	-11.2467	2.40422e-29	3.25456e-27
6173	RPL36A	10315.6	1.84086	0.164074	11.2197	3.2652e-29	4.38413e-27
1184	CLCN5	2141.34	-2.65336	0.237161	-11.188	4.6677e-29	6.2167e-27
5315	PKM	21535.9	-1.8431	0.165465	-11.1389	8.11265e-29	1.07184e-26
6091	ROBO1	4559.8	-2.20805	0.198617	-11.1171	1.0359e-28	1.35778e-26
1113	CHGA	2319.16	2.93854	0.264728	11.1002	1.25105e-28	1.62686e-26
23551	RASD2	956.926	3.51445	0.316751	11.0953	1.32188e-28	1.70554e-26
2645	GCK	1212	4.67944	0.422929	11.0644	1.86759e-28	2.39095e-26
6760	SS18	5491.58	-1.94638	0.176315	-11.0392	2.47199e-28	3.14037e-26
90249	UNC5A	914.132	3.95547	0.359783	10.9941	4.08165e-28	5.14568e-26
6446	SGK1	1600.66	-2.83182	0.257607	-10.9928	4.13782e-28	5.17697e-26
56142	PCDHA6	269.74	-6.00654	0.546463	-10.9917	4.1918e-28	5.20508e-26
10525	HYOU1	5843.79	-1.94764	0.177354	-10.9816	4.68301e-28	5.77164e-26
8153	RND2	5586.49	2.4835	0.226988	10.9411	7.32947e-28	8.96639e-26
4627	MYH9	7099.16	-2.38099	0.21783	-10.9305	8.24212e-28	1.00087e-25
10512	SEMA3C	4232.48	-2.07529	0.190204	-10.9109	1.02256e-27	1.23267e-25
7216	TRO	8568.23	-1.90019	0.174959	-10.8608	1.77231e-27	2.121e-25
10769	PLK2	4835.95	-2.07842	0.191521	-10.8522	1.94746e-27	2.31384e-25
139221	MUM1L1	2167.26	-2.58716	0.238515	-10.847	2.06176e-27	2.43214e-25
1956	EGFR	1259.3	-3.57108	0.332706	-10.7334	7.091e-27	8.30552e-25
23065	EMC1	2792.39	-2.23656	0.20879	-10.712	8.94362e-27	1.04017e-24
10100	TSPAN2	1342.08	3.09159	0.290234	10.6521	1.70547e-26	1.96964e-24
55568	GALNT10	4763.31	-2.22711	0.210121	-10.5992	3.00487e-26	3.44621e-24
5806	PTX3	10901.8	2.32862	0.219827	10.593	3.21227e-26	3.65866e-24
5270	SERPINE2	13154.4	-1.81306	0.171353	-10.5809	3.65604e-26	4.13558e-24
285016	ALKAL2	637.728	5.2905	0.501741	10.5443	5.3983e-26	6.06483e-24
7045	TGFBI	6694.66	-2.01415	0.191595	-10.5125	7.5635e-26	8.43994e-24
29927	SEC61A1	14998.7	-1.77517	0.168927	-10.5085	7.89427e-26	8.74992e-24
6664	SOX11	8765.26	1.81928	0.174139	10.4473	1.50722e-25	1.65945e-23
4628	MYH10	10648.9	-1.70235	0.16332	-10.4233	1.94007e-25	2.12187e-23
7138	TNNT1	1160.3	3.12132	0.301699	10.3458	4.37242e-25	4.7507e-23
7058	THBS2	763.142	-3.2626	0.315651	-10.3361	4.83713e-25	5.22126e-23
1301	COL11A1	21617.6	-1.84497	0.178656	-10.327	5.32164e-25	5.70694e-23
114899	C1QTNF3	1181.83	-3.12253	0.303666	-10.2828	8.42645e-25	8.97825e-23
3213	HOXB3	1054.48	3.15806	0.30715	10.2818	8.51216e-25	9.01143e-23
3908	LAMA2	591.968	-4.47958	0.435713	-10.281	8.58033e-25	9.02574e-23
27242	TNFRSF21	4248.78	-2.03942	0.19932	-10.2319	1.42666e-24	1.49122e-22
10468	FST	1950.15	2.45348	0.240477	10.2025	1.93175e-24	2.00647e-22
1642	DDB1	7672.92	-2.07924	0.204832	-10.151	3.28021e-24	3.3858e-22
87	ACTN1	18623.6	-1.66444	0.164221	-10.1354	3.84952e-24	3.94875e-22
57348	TTYH1	10614.6	1.78557	0.176238	10.1316	4.00179e-24	4.0796e-22
5295	PIK3R1	2280.69	-2.15619	0.213446	-10.1018	5.423e-24	5.49453e-22
84281	C2orf88	583.467	5.58657	0.553276	10.0973	5.68076e-24	5.7206e-22
136227	COL26A1	27025.2	-1.51781	0.150411	-10.0911	6.04834e-24	6.05383e-22
1495	CTNNA1	12668.9	-1.75955	0.174943	-10.0578	8.48421e-24	8.44077e-22
2734	GLG1	13002.4	-1.68897	0.167967	-10.0554	8.70011e-24	8.60373e-22
22944	KIN	42145.8	1.76532	0.175612	10.0524	8.9696e-24	8.81744e-22
7122	CLDN5	741.509	5.0917	0.508661	10.01	1.37768e-23	1.34629e-21
27063	ANKRD1	2410.59	2.26997	0.226939	10.0026	1.48508e-23	1.44271e-21
284217	LAMA1	68798.5	5.89935	0.590155	9.99628	1.58234e-23	1.52821e-21
23240	KIAA0922	2326.56	-2.35187	0.235474	-9.98781	1.72351e-23	1.65487e-21
821	CANX	23512.6	-1.54369	0.1546	-9.98507	1.7717e-23	1.69131e-21
7052	TGM2	6129.45	-1.94582	0.195334	-9.96152	2.246e-23	2.13176e-21
9500	MAGED1	27742.2	-1.57635	0.158259	-9.96056	2.26787e-23	2.14022e-21
2934	GSN	6126.91	-1.79937	0.181064	-9.93773	2.8524e-23	2.67656e-21
23420	NOMO1	5160.74	-2.04923	0.20648	-9.9246	3.25412e-23	3.03626e-21
153572	IRX2	3073.17	2.10977	0.213071	9.90174	4.091e-23	3.79567e-21
3678	ITGA5	9277.97	-1.87984	0.190202	-9.88338	4.91461e-23	4.53434e-21
10085	EDIL3	2685.8	-2.08113	0.211453	-9.84202	7.42038e-23	6.8082e-21
3206	HOXA10	633.849	3.79924	0.386379	9.83292	8.12286e-23	7.41155e-21
2799	GNS	7194.66	-1.70513	0.173919	-9.80413	1.08077e-22	9.80713e-21
6623	SNCG	1912.62	2.82205	0.288763	9.77292	1.47148e-22	1.32795e-20
57462	KIAA1161	583.263	-3.94448	0.403684	-9.77121	1.49654e-22	1.34322e-20
9902	MRC2	11250.1	-2.18004	0.223536	-9.75254	1.79908e-22	1.60605e-20
7852	CXCR4	969.65	3.05775	0.31388	9.7418	1.99989e-22	1.7757e-20
2302	FOXJ1	646.674	3.70923	0.381403	9.72522	2.35406e-22	2.079e-20
388419	BTBD17	2922.33	2.05747	0.212278	9.6923	3.25118e-22	2.85602e-20
9543	IGDCC3	11807.2	2.42773	0.250503	9.69142	3.27934e-22	2.86552e-20
6232	RPS27	26238.6	1.53247	0.158396	9.67493	3.85356e-22	3.34955e-20
30011	SH3KBP1	1540.45	-2.39858	0.248457	-9.65389	4.73236e-22	4.09188e-20
9343	EFTUD2	3804.59	-1.85945	0.192679	-9.6505	4.89167e-22	4.2076e-20
283820	NOMO2	4493.86	-2.07458	0.215724	-9.61682	6.79e-22	5.78025e-20
100616209	MIR4461	1056.85	-2.62726	0.273182	-9.61724	6.76242e-22	5.78025e-20
3566	IL4R	1576.76	-2.70116	0.280899	-9.61614	6.83478e-22	5.78853e-20
53820	RIPPLY3	1503.64	2.66048	0.276706	9.61484	6.92176e-22	5.83229e-20
51079	NDUFA13	26310.3	1.49198	0.155366	9.60299	7.76613e-22	6.51054e-20
140578	CHODL	666.628	-3.58754	0.374205	-9.58709	9.06068e-22	7.55743e-20
84632	AFAP1L2	935.528	-3.79783	0.396856	-9.56979	1.07127e-21	8.89049e-20
497190	CLEC18B	1511.21	2.42892	0.25392	9.56568	1.11464e-21	9.11301e-20
10591	DNPH1	4054.17	1.80272	0.188454	9.56583	1.11302e-21	9.11301e-20
3376	IARS	6499.72	-1.67207	0.174791	-9.56613	1.10983e-21	9.11301e-20
100128252	ZNF667-AS1	1484.91	10.0322	1.04972	9.55708	1.21125e-21	9.8541e-20
728392	LOC728392	20668	1.53471	0.160612	9.55534	1.23179e-21	9.97207e-20
51176	LEF1	2347.98	-2.11822	0.22174	-9.55271	1.26347e-21	1.01786e-19
121227	LRIG3	4798	-1.82152	0.19076	-9.54874	1.31283e-21	1.0525e-19
80326	WNT10A	668.13	7.59752	0.796526	9.53833	1.4515e-21	1.15805e-19
57801	HES4	1085.82	2.76596	0.291176	9.49927	2.11366e-21	1.67822e-19
9948	WDR1	11636.3	-1.50113	0.158393	-9.47727	2.61017e-21	2.06254e-19
928	CD9	1000.16	3.05948	0.323282	9.46383	2.96855e-21	2.33455e-19
55655	NLRP2	271.191	-12.2115	1.29187	-9.45257	3.30618e-21	2.58775e-19
3098	HK1	5615.79	-1.69643	0.179666	-9.44215	3.65219e-21	2.84509e-19
5573	PRKAR1A	18632.8	-1.56996	0.166424	-9.43348	3.96715e-21	3.07594e-19
6662	SOX9	6534.41	-1.83647	0.195183	-9.409	5.00885e-21	3.86547e-19
7415	VCP	19412	-1.87415	0.199805	-9.37992	6.60248e-21	5.07162e-19
25932	CLIC4	8454.51	-1.54142	0.16444	-9.37372	7.0018e-21	5.35346e-19
8793	TNFRSF10D	3153.72	-1.87862	0.200601	-9.36499	7.60578e-21	5.78845e-19
1277	COL1A1	69157.1	-1.48899	0.159271	-9.34878	8.86604e-21	6.71663e-19
1641	DCX	17572.6	1.73186	0.185391	9.34166	9.48355e-21	7.15164e-19
4488	MSX2	15453.6	-1.42792	0.153932	-9.27629	1.75478e-20	1.31728e-18
201595	STT3B	4499.54	-1.80043	0.194184	-9.27179	1.83044e-20	1.36786e-18
2042	EPHA3	1826.13	-2.13436	0.230622	-9.25478	2.14669e-20	1.59696e-18
55031	USP47	7077.29	-1.71854	0.186487	-9.21533	3.10317e-20	2.29816e-18
100131801	PET100	10539.9	1.59569	0.173197	9.21313	3.16757e-20	2.33537e-18
9793	CKAP5	2832.38	-1.89029	0.205256	-9.20944	3.27837e-20	2.40632e-18
4076	CAPRIN1	8716.04	-1.57224	0.171031	-9.19269	3.83137e-20	2.79978e-18
83719	YPEL3	2912.93	2.24553	0.244332	9.19049	3.91058e-20	2.84508e-18
59286	UBL5	23998.9	1.40617	0.153111	9.184	4.1537e-20	3.0087e-18
10245	TIMM17B	9098.95	1.53271	0.166984	9.17877	4.36039e-20	3.14462e-18
85449	KIAA1755	1315.96	-3.33534	0.364338	-9.15453	5.45967e-20	3.92028e-18
3291	HSD11B2	419.528	5.45827	0.597111	9.14114	6.17988e-20	4.41821e-18
22820	COPG1	10356.5	-1.60882	0.176955	-9.09172	9.74824e-20	6.93932e-18
9107	MTMR6	2328.17	-2.27773	0.250547	-9.091	9.81293e-20	6.95539e-18
6594	SMARCA1	9784.64	-1.72791	0.19014	-9.08756	1.01288e-19	7.14861e-18
1996	ELAVL4	1581.05	2.47415	0.272632	9.07505	1.13622e-19	7.98495e-18
8577	TMEFF1	9164.37	1.82444	0.201161	9.06952	1.19538e-19	8.36512e-18
1009	CDH11	20806.1	-1.52952	0.169095	-9.04533	1.49218e-19	1.0398e-17
1632	ECI1	3237.28	1.9487	0.215597	9.03862	1.58659e-19	1.10095e-17
58494	JAM2	2475.17	2.00093	0.221883	9.01793	1.9168e-19	1.32452e-17
100463488	MTRNR2L10	1031.53	-2.4915	0.276304	-9.01724	1.92893e-19	1.32734e-17
5979	RET	503.307	-3.58159	0.397727	-9.00513	2.15405e-19	1.4761e-17
2	A2M	2668.39	-2.00408	0.222955	-8.98874	2.50092e-19	1.70672e-17
8985	PLOD3	4143.04	-1.80508	0.201088	-8.97661	2.79243e-19	1.89782e-17
6909	TBX2	617.856	-3.94912	0.440243	-8.9703	2.95701e-19	2.00143e-17
3654	IRAK1	3024.7	-2.20992	0.246517	-8.96458	3.11469e-19	2.09956e-17
47	ACLY	7238.14	-1.53188	0.171379	-8.93857	3.9425e-19	2.64676e-17
64377	CHST8	704.786	3.35066	0.375462	8.9241	4.49332e-19	3.00434e-17
9213	XPR1	3885.32	-1.66117	0.186297	-8.9168	4.79951e-19	3.19613e-17
23213	SULF1	4219.31	-1.62791	0.182926	-8.8993	5.62023e-19	3.72763e-17
8842	PROM1	2958.83	-2.01924	0.226915	-8.89869	5.65122e-19	3.73319e-17
1028	CDKN1C	1712.47	2.36714	0.266344	8.88754	6.24769e-19	4.11078e-17
7837	PXDN	18436.4	-1.4893	0.167701	-8.88072	6.64273e-19	4.35336e-17
163	AP2B1	5080.61	-1.73775	0.195862	-8.87234	7.16255e-19	4.67547e-17
3223	HOXC6	464.361	6.64456	0.749827	8.86146	7.89731e-19	5.1348e-17
6781	STC1	1099.19	-3.1823	0.359137	-8.86097	7.93209e-19	5.13719e-17
7108	TM7SF2	6635.33	1.73712	0.19606	8.86014	7.99107e-19	5.15518e-17
7704	ZBTB16	743.384	3.04264	0.34386	8.84847	8.87249e-19	5.70152e-17
79090	TRAPPC6A	2634.09	1.89117	0.213763	8.84706	8.98588e-19	5.73969e-17
1915	EEF1A1	208043	1.28412	0.14515	8.84686	9.00139e-19	5.73969e-17
57597	BAHCC1	1322.07	3.62487	0.40994	8.84243	9.3658e-19	5.94908e-17
54101	RIPK4	454.039	-3.96422	0.448397	-8.84087	9.49787e-19	6.00986e-17
8828	NRP2	3351.59	-1.77395	0.201386	-8.80869	1.26621e-18	7.98146e-17
9547	CXCL14	866.555	-2.89551	0.328757	-8.80744	1.28035e-18	8.03994e-17
84629	TNRC18	3910.4	2.92915	0.332818	8.80107	1.35522e-18	8.47781e-17
6197	RPS6KA3	3520.61	-1.70013	0.193739	-8.77534	1.70387e-18	1.06186e-16
23648	SSBP3	6378.86	1.54374	0.175976	8.77241	1.74878e-18	1.08576e-16
258010	SVIP	2517.8	1.90298	0.216998	8.76957	1.7935e-18	1.10935e-16
3156	HMGCR	8912.58	-1.65518	0.18881	-8.76637	1.84514e-18	1.13703e-16
27324	TOX3	1421.36	2.29509	0.263018	8.726	2.63828e-18	1.61974e-16
196	AHR	701.495	-2.87224	0.329357	-8.72075	2.76363e-18	1.69042e-16
53637	S1PR5	1272.38	2.30813	0.265221	8.70268	3.24145e-18	1.97537e-16
3676	ITGA4	4480.09	-2.11644	0.243351	-8.69708	3.40546e-18	2.06769e-16
22838	RNF44	1147.13	2.52198	0.290427	8.6837	3.83085e-18	2.31745e-16
6202	RPS8	22651.3	1.32423	0.15284	8.66418	4.54784e-18	2.74115e-16
5087	PBX1	6150.45	1.92631	0.222363	8.66291	4.59866e-18	2.7617e-16
162494	RHBDL3	985.321	3.73428	0.431688	8.65041	5.13135e-18	3.07044e-16
2202	EFEMP1	1884.86	2.23633	0.259047	8.6329	5.98148e-18	3.56622e-16
387597	ILDR2	441.396	4.81492	0.557887	8.63064	6.10081e-18	3.62427e-16
23564	DDAH2	22585.3	1.33406	0.154734	8.62162	6.60111e-18	3.90743e-16
23589	CARHSP1	7247.74	1.70077	0.197499	8.61156	7.20706e-18	4.25088e-16
81575	APOLD1	693.634	-2.97142	0.345315	-8.60496	7.63438e-18	4.48689e-16
64175	P3H1	14182	-1.42957	0.166262	-8.59829	8.09126e-18	4.73855e-16
4610	MYCL	903.088	2.98717	0.348149	8.58014	9.47568e-18	5.52971e-16
408050	NOMO3	2889.46	-1.83123	0.213498	-8.5773	9.71263e-18	5.64803e-16
23191	CYFIP1	4064.57	-1.58118	0.185047	-8.54475	1.28816e-17	7.46456e-16
1903	S1PR3	4864.02	-1.55581	0.18211	-8.54325	1.30501e-17	7.53572e-16
84268	RPAIN	7288.24	1.47054	0.172142	8.5426	1.31238e-17	7.55189e-16
10128	LRPPRC	2468.66	-1.84984	0.216725	-8.53539	1.39678e-17	8.00967e-16
10146	G3BP1	7655.81	-1.46476	0.171865	-8.52274	1.55821e-17	8.8842e-16
1889	ECE1	3046.51	-1.75909	0.206403	-8.5226	1.56005e-17	8.8842e-16
3590	IL11RA	18627.2	1.58654	0.186331	8.51463	1.67129e-17	9.48499e-16
1654	DDX3X	12406.2	-1.50848	0.177537	-8.49671	1.95039e-17	1.1031e-15
2132	EXT2	5888.92	-1.47384	0.174104	-8.46526	2.55581e-17	1.44059e-15
81567	TXNDC5	23468.1	-1.30701	0.154428	-8.46351	2.59454e-17	1.45744e-15
6135	RPL11	13797.4	1.32417	0.156672	8.45182	2.86791e-17	1.60554e-15
114900	C1QTNF4	1156.23	-2.25644	0.26719	-8.44509	3.03819e-17	1.69513e-15
23220	DTX4	1986.39	2.04106	0.241714	8.44412	3.06342e-17	1.70345e-15
1493	CTLA4	161.893	-11.4672	1.35812	-8.44346	3.08079e-17	1.70736e-15
84695	LOXL3	3711.51	-1.78597	0.21221	-8.41605	3.89403e-17	2.15083e-15
1464	CSPG4	647.634	-3.16153	0.375694	-8.41517	3.92312e-17	2.15968e-15
746	TMEM258	12661.9	1.33419	0.158715	8.40621	4.23476e-17	2.32349e-15
6230	RPS25	38552.9	1.23825	0.147315	8.40546	4.26183e-17	2.3306e-15
4701	NDUFA7	4810.44	1.51947	0.181349	8.37871	5.35123e-17	2.91668e-15
54869	EPS8L1	718.148	3.06665	0.366289	8.37222	5.65412e-17	3.07164e-15
7088	TLE1	2811.11	-1.69199	0.202218	-8.36715	5.90264e-17	3.19614e-15
3842	TNPO1	10317.8	-1.43386	0.171806	-8.34582	7.07224e-17	3.81693e-15
26232	FBXO2	2059.19	2.16373	0.259488	8.33844	7.52793e-17	4.04963e-15
80274	SCUBE1	1308.52	2.26192	0.271478	8.33186	7.95792e-17	4.26705e-15
56886	UGGT1	2234.58	-1.83312	0.220378	-8.31807	8.94041e-17	4.77835e-15
4808	NHLH2	962.6	2.53777	0.305441	8.30854	9.68842e-17	5.16143e-15
81855	SFXN3	1641.73	-1.94824	0.234846	-8.29582	1.07836e-16	5.7264e-15
27122	DKK3	6161.08	-1.66224	0.200548	-8.2885	1.1469e-16	6.07086e-15
7025	NR2F1	4560.59	1.54144	0.18599	8.28775	1.15412e-16	6.08953e-15
5720	PSME1	6635.24	1.48237	0.178908	8.28569	1.17431e-16	6.17635e-15
55859	BEX1	16075.8	1.52469	0.184363	8.27003	1.33923e-16	7.0214e-15
154791	FMC1	3047.99	1.84819	0.223894	8.25472	1.52255e-16	7.95723e-15
347733	TUBB2B	18898.3	1.47892	0.179398	8.2438	1.66829e-16	8.69145e-15
23135	KDM6B	1214.67	2.65081	0.321608	8.24236	1.68844e-16	8.76875e-15
51114	ZDHHC9	5646.02	-1.66503	0.202145	-8.23681	1.7686e-16	9.15414e-15
6695	SPOCK1	2952.16	-1.72114	0.208966	-8.23646	1.77374e-16	9.15414e-15
51066	SSUH2	260.439	5.39838	0.656867	8.21837	2.06296e-16	1.06136e-14
7158	TP53BP1	3174.8	-1.79054	0.217951	-8.21537	2.11518e-16	1.08485e-14
10381	TUBB3	18154.1	1.39441	0.169759	8.21407	2.13812e-16	1.09322e-14
51267	CLEC1A	755.366	-3.09178	0.376962	-8.20185	2.36718e-16	1.2066e-14
4713	NDUFB7	8373.04	1.35585	0.165427	8.19603	2.48454e-16	1.26253e-14
7111	TMOD1	422.404	6.1066	0.746844	8.17654	2.92121e-16	1.47987e-14
3688	ITGB1	48401.6	-1.24657	0.152531	-8.17257	3.01889e-16	1.52468e-14
9349	RPL23	19677.6	1.29949	0.159076	8.16895	3.11091e-16	1.56636e-14
25937	WWTR1	4179.07	-1.69313	0.207395	-8.1638	3.24641e-16	1.62962e-14
147372	CCBE1	1276.64	2.40431	0.29499	8.15046	3.62528e-16	1.81429e-14
4017	LOXL2	10642.5	-1.44705	0.177586	-8.14846	3.68573e-16	1.83897e-14
5654	HTRA1	12740.6	-1.34549	0.165187	-8.14521	3.78618e-16	1.8834e-14
10631	POSTN	10131.6	-1.85479	0.227931	-8.1375	4.03513e-16	2.0012e-14
7317	UBA1	15557.6	-1.46644	0.181339	-8.08672	6.12939e-16	3.03075e-14
80144	FRAS1	1905.14	-2.03982	0.252332	-8.08388	6.27401e-16	3.09299e-14
1602	DACH1	2722.68	1.92328	0.238131	8.07658	6.66102e-16	3.27401e-14
4883	NPR3	6135.31	1.52575	0.190005	8.03002	9.74579e-16	4.77602e-14
26173	INTS1	2431.02	-1.83377	0.228448	-8.02709	9.98103e-16	4.87682e-14
84299	MIEN1	5651.73	1.46787	0.183235	8.01088	1.13894e-15	5.54854e-14
170622	COMMD6	10141.8	1.30123	0.162634	8.001	1.23415e-15	5.99471e-14
8549	LGR5	904.587	-2.29575	0.287922	-7.97352	1.54221e-15	7.46909e-14
5010	CLDN11	5388.42	1.5734	0.197727	7.95746	1.75609e-15	8.48009e-14
9427	ECEL1	730.119	2.70661	0.340568	7.94734	1.90562e-15	9.14863e-14
6164	RPL34	20504.3	1.28166	0.161263	7.94763	1.90116e-15	9.14863e-14
6586	SLIT3	3205.17	-2.10521	0.264956	-7.94551	1.93395e-15	9.25113e-14
2040	STOM	914.772	-2.34268	0.294853	-7.94524	1.93817e-15	9.25113e-14
79623	GALNT14	544.373	3.04607	0.38358	7.94116	2.00299e-15	9.53299e-14
10427	SEC24B	1946.47	-1.88644	0.23782	-7.93224	2.15237e-15	1.02145e-13
4926	NUMA1	3771.61	-1.74942	0.220635	-7.92901	2.20908e-15	1.04536e-13
90050	FAM181A	303.781	5.02779	0.63432	7.92627	2.25827e-15	1.06558e-13
8854	ALDH1A2	941.927	2.57043	0.324954	7.91016	2.57063e-15	1.20951e-13
3785	KCNQ2	3852.79	1.50365	0.190148	7.90777	2.62033e-15	1.2294e-13
9480	ONECUT2	3125.21	2.14746	0.271602	7.90662	2.64476e-15	1.23734e-13
9782	MATR3	17451.2	-1.38723	0.175523	-7.90341	2.71366e-15	1.26599e-13
7077	TIMP2	3346.42	1.55727	0.197515	7.8843	3.16304e-15	1.47106e-13
51479	ANKFY1	1931.9	-1.83695	0.232998	-7.88398	3.17105e-15	1.47106e-13
55861	DBNDD2	1244.12	2.21899	0.281474	7.88347	3.18421e-15	1.47303e-13
55711	FAR2	1205.2	-2.44386	0.310749	-7.86441	3.70832e-15	1.7107e-13
29954	POMT2	1892.45	-1.89356	0.240882	-7.86094	3.81255e-15	1.74901e-13
9871	SEC24D	5346.02	-1.93864	0.246613	-7.86106	3.80896e-15	1.74901e-13
9276	COPB2	10481.4	-1.54724	0.197427	-7.837	4.61441e-15	2.111e-13
29127	RACGAP1	2388.35	-1.75146	0.223819	-7.82537	5.06152e-15	2.30915e-13
4957	ODF2	2695.97	-1.74951	0.223783	-7.81788	5.37188e-15	2.44398e-13
93	ACVR2B	2889.37	1.94143	0.248436	7.81459	5.51403e-15	2.50176e-13
55832	CAND1	5506.68	-1.63524	0.209356	-7.81082	5.68174e-15	2.57079e-13
102	ADAM10	3316.14	-1.71995	0.220268	-7.80846	5.78918e-15	2.61225e-13
57451	TENM2	1185.62	-2.22568	0.285083	-7.80712	5.85114e-15	2.63301e-13
27258	LSM3	11389.4	1.27186	0.162994	7.80314	6.0387e-15	2.71003e-13
22795	NID2	1461.23	-2.58242	0.331259	-7.79578	6.401e-15	2.86484e-13
29952	DPP7	2259.9	1.991	0.255494	7.79275	6.55669e-15	2.92659e-13
55220	KLHDC8A	1074.21	3.17126	0.407432	7.78354	7.05212e-15	3.13924e-13
827	CAPN6	4496.45	-1.72279	0.221449	-7.77963	7.27387e-15	3.22925e-13
2006	ELN	1089.64	2.3092	0.296971	7.77586	7.49369e-15	3.31792e-13
2273	FHL1	11544.6	-1.24026	0.159509	-7.77551	7.51417e-15	3.31809e-13
11075	STMN2	13600.9	1.3605	0.175143	7.76796	7.97619e-15	3.51271e-13
8539	API5	6214.16	-1.36834	0.176174	-7.76698	8.03781e-15	3.53044e-13
201161	CENPV	6719.79	1.31885	0.169858	7.76445	8.2003e-15	3.59225e-13
8404	SPARCL1	2926.16	-1.94708	0.251161	-7.75234	9.0218e-15	3.94167e-13
8078	USP5	3815.5	-1.48662	0.191799	-7.75089	9.12499e-15	3.97623e-13
89796	NAV1	3136.28	-2.16644	0.279745	-7.74434	9.60771e-15	4.17556e-13
387522	TMEM189-UBE2V1	327.333	-4.11309	0.531153	-7.74371	9.65596e-15	4.18552e-13
6146	RPL22	7841.04	1.37469	0.177654	7.73799	1.01e-14	4.36653e-13
1993	ELAVL2	957.2	2.33412	0.301834	7.73315	1.0492e-14	4.52416e-13
81557	MAGED4B	5297.47	-1.47329	0.190854	-7.71947	1.16813e-14	5.02389e-13
25907	TMEM158	1490.6	2.09474	0.27139	7.71854	1.17666e-14	5.04742e-13
517	ATP5G2	18022.3	1.2479	0.161717	7.71656	1.19514e-14	5.1134e-13
521	ATP5I	12876	1.23324	0.159985	7.70849	1.27318e-14	5.41924e-13
1601	DAB2	5692.74	-1.4127	0.18326	-7.70871	1.27095e-14	5.41924e-13
9945	GFPT2	2013.2	-1.78964	0.232229	-7.70636	1.29452e-14	5.4959e-13
7482	WNT2B	475.038	3.27025	0.424416	7.70529	1.30548e-14	5.52819e-13
90871	TMEM261	6497.72	1.37466	0.178548	7.69911	1.37017e-14	5.78729e-13
1893	ECM1	389.794	-3.20709	0.417247	-7.68631	1.51438e-14	6.3801e-13
56133	PCDHB2	2508.1	-2.11581	0.275512	-7.67956	1.59636e-14	6.70836e-13
23062	GGA2	2701.54	-1.70276	0.221854	-7.67511	1.65277e-14	6.9278e-13
118487	CHCHD1	4978.89	1.42953	0.186279	7.67416	1.66509e-14	6.96177e-13
6171	RPL41	52042.2	1.1389	0.148419	7.6735	1.67364e-14	6.97983e-13
25878	MXRA5	4741.84	-1.44556	0.188399	-7.67287	1.68193e-14	6.99673e-13
54480	CHPF2	3759.55	-1.4767	0.192593	-7.66745	1.7545e-14	7.26509e-13
8321	FZD1	3531.03	-1.4939	0.194838	-7.6674	1.75524e-14	7.26509e-13
28958	COA3	12189.6	1.26591	0.16512	7.66664	1.76564e-14	7.28987e-13
23521	RPL13A	30094.9	1.14578	0.149559	7.66102	1.84462e-14	7.59698e-13
7976	FZD3	7725.88	1.3717	0.179142	7.65706	1.90232e-14	7.81513e-13
23339	VPS39	3014.94	-1.53045	0.200224	-7.64371	2.11054e-14	8.64902e-13
3217	HOXB7	522.217	8.24294	1.07891	7.64009	2.17066e-14	8.8734e-13
2673	GFPT1	4683.16	-1.50216	0.196644	-7.63898	2.1895e-14	8.92831e-13
340527	NHSL2	1244	-2.01641	0.264422	-7.62575	2.42619e-14	9.86911e-13
379	ARL4D	3621.91	1.65637	0.217294	7.6227	2.48416e-14	1.00609e-12
83692	CD99L2	4093.1	-1.51712	0.199028	-7.62263	2.48553e-14	1.00609e-12
387647	PTCHD3P1	109.738	-10.9062	1.43313	-7.61008	2.73925e-14	1.10608e-12
140606	SELENOM	5580.42	1.70478	0.224248	7.6022	2.91144e-14	1.17134e-12
3832	KIF11	1737.76	-1.79435	0.236036	-7.60204	2.91504e-14	1.17134e-12
586	BCAT1	7709.21	-1.28825	0.169507	-7.59994	2.9626e-14	1.18756e-12
100506311	HOTAIRM1	1658.47	1.81686	0.239711	7.57936	3.47253e-14	1.38859e-12
1644	DDC	329.495	-3.96727	0.523583	-7.57714	3.53245e-14	1.40914e-12
5064	PALM	1634.54	1.92198	0.253829	7.57194	3.67696e-14	1.46325e-12
2975	GTF3C1	2378.92	-1.89206	0.24994	-7.57006	3.73039e-14	1.48095e-12
730	C7	379.082	-3.68123	0.486754	-7.56282	3.94426e-14	1.5621e-12
57007	ACKR3	2364.08	1.65195	0.218459	7.56184	3.97422e-14	1.5702e-12
103	ADAR	6912.55	-1.47712	0.195433	-7.55819	4.08712e-14	1.61095e-12
83988	NCALD	5371.6	1.33658	0.176904	7.55543	4.17483e-14	1.63898e-12
6168	RPL37A	22410	1.14752	0.151885	7.55518	4.18271e-14	1.63898e-12
9898	UBAP2L	5421.95	-1.33451	0.176639	-7.55502	4.188e-14	1.63898e-12
10096	ACTR3	9503.49	-1.22795	0.162699	-7.54736	4.44177e-14	1.73418e-12
6147	RPL23A	36858.4	1.21762	0.161407	7.54375	4.56643e-14	1.77865e-12
161253	REM2	1087.97	2.20473	0.292406	7.53995	4.70142e-14	1.82692e-12
2139	EYA2	327.468	6.5067	0.863259	7.53736	4.7957e-14	1.85918e-12
3913	LAMB2	8022.49	-1.38954	0.184511	-7.53091	5.0389e-14	1.94889e-12
23596	OPN3	6188.24	1.33704	0.17766	7.52584	5.23814e-14	2.02121e-12
200942	KLHDC8B	8313.05	1.40737	0.187071	7.52322	5.34417e-14	2.05732e-12
6252	RTN1	9388.01	1.31983	0.175495	7.52063	5.45125e-14	2.09366e-12
122060	SLAIN1	1688.24	1.79776	0.23923	7.51475	5.70202e-14	2.18489e-12
2257	FGF12	1529.08	2.10213	0.279823	7.51237	5.80668e-14	2.21984e-12
10808	HSPH1	4535.88	-1.46602	0.195232	-7.50911	5.95297e-14	2.27052e-12
6622	SNCA	4362.62	-1.44547	0.192579	-7.50589	6.10127e-14	2.32172e-12
6205	RPS11	24980.7	1.15553	0.153978	7.50456	6.16374e-14	2.3401e-12
23269	MGA	997.341	-2.1121	0.281659	-7.49879	6.44098e-14	2.43974e-12
255130	IGFBP7-AS1	285.968	4.54791	0.606753	7.49549	6.60519e-14	2.49622e-12
10495	ENOX2	3401.41	1.46209	0.195173	7.49127	6.82096e-14	2.57188e-12
23468	CBX5	16578.2	-1.23236	0.164565	-7.48859	6.96152e-14	2.6189e-12
23509	POFUT1	2838.1	-1.63696	0.218671	-7.48595	7.103e-14	2.66605e-12
4709	NDUFB3	12079.4	1.26116	0.16864	7.47846	7.51999e-14	2.81616e-12
83460	EMC6	5374.62	1.31751	0.176412	7.46834	8.12151e-14	3.03454e-12
8763	CD164	18964.3	-1.38112	0.185084	-7.46215	8.51223e-14	3.17335e-12
646960	PRSS56	286.567	4.77625	0.64026	7.45987	8.66084e-14	3.22148e-12
1665	DHX15	6283.96	-1.42343	0.191013	-7.45197	9.19573e-14	3.41275e-12
56934	CA10	1693.89	-2.67953	0.359724	-7.44886	9.41523e-14	3.48638e-12
79727	LIN28A	615.589	3.15052	0.422984	7.4483	9.45502e-14	3.49328e-12
23428	SLC7A8	973.77	-2.10855	0.283215	-7.44508	9.68869e-14	3.57162e-12
6235	RPS29	11881.6	1.21829	0.163674	7.44342	9.81101e-14	3.60866e-12
4015	LOX	2284.08	-1.62343	0.218128	-7.44257	9.87463e-14	3.62399e-12
143	PARP4	1333.53	-1.86876	0.251577	-7.42818	1.10104e-13	4.03185e-12
26872	STEAP1	504.009	3.41026	0.459179	7.42685	1.11216e-13	4.06357e-12
5502	PPP1R1A	1495.99	1.92373	0.25907	7.42555	1.12314e-13	4.09464e-12
60681	FKBP10	3217.38	-2.10327	0.283277	-7.42478	1.12968e-13	4.10939e-12
253943	YTHDF3	2312.12	-1.74306	0.235033	-7.41625	1.20484e-13	4.37317e-12
3728	JUP	4927.76	-1.4667	0.198048	-7.40579	1.30375e-13	4.72182e-12
23531	MMD	3891.97	-1.42867	0.193106	-7.39836	1.3788e-13	4.98268e-12
60674	GAS5	3208.67	1.49667	0.202319	7.3976	1.3867e-13	5.0003e-12
9636	ISG15	1867.52	1.7987	0.243208	7.39573	1.40634e-13	5.06007e-12
6616	SNAP25	2181.76	1.62941	0.220398	7.39301	1.43537e-13	5.15328e-12
100093630	SNHG8	1364.34	1.9822	0.268601	7.37974	1.58596e-13	5.68159e-12
5007	OSBP	3136.71	-1.67903	0.227588	-7.37746	1.61337e-13	5.76729e-12
5329	PLAUR	1214.45	-2.24745	0.304819	-7.37306	1.6676e-13	5.94825e-12
22974	TPX2	2692.92	-1.53522	0.208259	-7.37171	1.68457e-13	5.99585e-12
57060	PCBP4	12139.4	1.32498	0.179747	7.37138	1.68872e-13	5.99767e-12
9061	PAPSS1	7311.15	-1.52763	0.207273	-7.37014	1.70448e-13	6.04066e-12
64093	SMOC1	495.64	3.21209	0.435894	7.36897	1.71954e-13	6.08098e-12
283971	CLEC18C	633.865	2.62916	0.357062	7.3633	1.79415e-13	6.33129e-12
372	ARCN1	8717.57	-1.27967	0.173933	-7.35724	1.87753e-13	6.61137e-12
5358	PLS3	26550.7	-1.59433	0.216821	-7.35321	1.93496e-13	6.79911e-12
22993	HMGXB3	1399.16	-1.82726	0.248632	-7.34925	1.99315e-13	6.98873e-12
80763	SPX	2368.9	2.53089	0.344521	7.34611	2.04052e-13	7.13966e-12
1298	COL9A2	5715.6	-1.33799	0.182287	-7.34001	2.13581e-13	7.45726e-12
1718	DHCR24	14198.7	-1.26458	0.172356	-7.33699	2.18453e-13	7.6113e-12
27327	TNRC6A	2069.36	1.62623	0.221682	7.33585	2.20315e-13	7.66e-12
4736	RPL10A	15228.2	1.16524	0.158986	7.32919	2.31553e-13	8.01698e-12
83786	FRMD8	1794.26	-1.7236	0.235163	-7.32938	2.31224e-13	8.01698e-12
9867	PJA2	7134.34	-1.29186	0.176333	-7.32628	2.36626e-13	8.17549e-12
4212	MEIS2	4092.99	1.38493	0.189171	7.32107	2.46002e-13	8.48167e-12
80150	ASRGL1	1521.71	1.87425	0.256408	7.30965	2.67842e-13	9.21545e-12
8971	H1FX	8038.57	1.23583	0.169083	7.30903	2.69071e-13	9.23848e-12
26032	SUSD5	668.572	-2.49346	0.341379	-7.30408	2.79179e-13	9.56565e-12
339983	NAT8L	515.008	3.19575	0.437814	7.29933	2.89199e-13	9.88843e-12
4124	MAN2A1	1502.08	-2.24214	0.307395	-7.294	3.00896e-13	1.02672e-11
64856	VWA1	2008.36	-1.64187	0.225154	-7.29219	3.04955e-13	1.03842e-11
4738	NEDD8	21505	1.11495	0.152937	7.29026	3.0936e-13	1.05125e-11
5033	P4HA1	8639.06	-1.31367	0.180291	-7.28634	3.18483e-13	1.08003e-11
78997	GDAP1L1	1281.02	1.90086	0.26099	7.28327	3.25835e-13	1.1027e-11
1287	COL4A5	5450.28	-1.45053	0.199172	-7.28278	3.27008e-13	1.10441e-11
1910	EDNRB	3904.76	1.4661	0.201364	7.28087	3.31664e-13	1.11784e-11
1008	CDH10	518.101	-2.6351	0.361944	-7.28041	3.32816e-13	1.11944e-11
100874362	HOXB-AS1	574.321	2.90966	0.401039	7.25531	4.00736e-13	1.34515e-11
5516	PPP2CB	2801.29	1.53182	0.211151	7.25462	4.02792e-13	1.34931e-11
351	APP	7994.69	-2.03842	0.281055	-7.25274	4.08427e-13	1.36542e-11
2590	GALNT2	6208.38	-1.44322	0.199224	-7.24422	4.34946e-13	1.45114e-11
2785	GNG3	3949.51	1.45274	0.200719	7.23769	4.56406e-13	1.51967e-11
5452	POU2F2	775.398	2.44718	0.338516	7.22913	4.86104e-13	1.61529e-11
9705	ST18	323.91	5.73626	0.793755	7.22674	4.94727e-13	1.64065e-11
10154	PLXNC1	2110.29	1.87891	0.260441	7.21432	5.42046e-13	1.79397e-11
133584	EGFLAM	448.59	-2.95148	0.409401	-7.20927	5.6251e-13	1.85797e-11
9320	TRIP12	2155.63	-1.59067	0.220704	-7.20726	5.70895e-13	1.8819e-11
3988	LIPA	4333.89	-1.7875	0.248321	-7.19833	6.09553e-13	2.00533e-11
2027	ENO3	873.54	2.34307	0.325542	7.19743	6.13586e-13	2.01459e-11
6130	RPL7A	17778.6	1.12563	0.156434	7.19555	6.22101e-13	2.03849e-11
79004	CUEDC2	11075.5	1.14989	0.159896	7.19145	6.41065e-13	2.09647e-11
4905	NSF	2489.21	-1.61915	0.225475	-7.18106	6.91716e-13	2.25765e-11
6224	RPS20	16185.8	1.17983	0.164362	7.17826	7.06027e-13	2.29981e-11
55504	TNFRSF19	2967.5	-1.49893	0.209099	-7.16855	7.5795e-13	2.46408e-11
51019	WASHC3	3315.43	1.46071	0.203972	7.16131	7.9912e-13	2.59066e-11
8795	TNFRSF10B	7215.48	-1.34131	0.187304	-7.16115	8.00024e-13	2.59066e-11
90634	N4BP2L1	611.171	2.71942	0.380251	7.15166	8.57373e-13	2.77094e-11
4637	MYL6	133750	1.20686	0.168779	7.15052	8.64529e-13	2.78861e-11
23082	PPRC1	1316.18	-1.93646	0.270865	-7.14918	8.72972e-13	2.81036e-11
7037	TFRC	2407.61	-1.59186	0.222854	-7.14306	9.12777e-13	2.93279e-11
340348	TSPAN33	1935.62	2.1213	0.297105	7.13992	9.33864e-13	2.99471e-11
57727	NCOA5	1812.08	-1.65324	0.23168	-7.13587	9.61797e-13	3.07831e-11
3670	ISL1	608.057	3.49132	0.489454	7.13308	9.81449e-13	3.13513e-11
5800	PTPRO	1666.34	1.99857	0.280251	7.13135	9.93881e-13	3.16872e-11
6208	RPS14	42387.1	1.1309	0.158822	7.12055	1.07498e-12	3.42066e-11
112885	PHF21B	441.524	3.22493	0.453039	7.11845	1.09148e-12	3.46648e-11
5351	PLOD1	5030.89	-1.40354	0.197236	-7.11607	1.11048e-12	3.52006e-11
1995	ELAVL3	319.613	3.68861	0.519032	7.10671	1.18838e-12	3.75978e-11
2170	FABP3	1802.02	1.76458	0.248502	7.10087	1.23972e-12	3.91471e-11
84959	UBASH3B	734.73	-2.21907	0.312699	-7.0965	1.27959e-12	4.03291e-11
100506421	LINC01158	1584.77	2.49643	0.351875	7.09466	1.29671e-12	4.07907e-11
3921	RPSA	19696.6	1.08952	0.15368	7.08955	1.34546e-12	4.22439e-11
56751	BARHL1	237.656	5.51339	0.777847	7.08802	1.36041e-12	4.26323e-11
84969	TOX2	363.784	3.34297	0.471803	7.08552	1.38524e-12	4.33283e-11
7162	TPBG	18332.3	1.15071	0.162594	7.07722	1.47075e-12	4.59159e-11
55651	NHP2	13751.6	1.16342	0.164475	7.07355	1.5102e-12	4.6992e-11
56265	CPXM1	15054.4	-1.13504	0.160464	-7.07348	1.51092e-12	4.6992e-11
26524	LATS2	1261.83	1.92452	0.27212	7.07231	1.52371e-12	4.72123e-11
54543	TOMM7	7065.31	1.25781	0.177843	7.07255	1.52111e-12	4.72123e-11
57687	VAT1L	1312.95	-1.78006	0.251718	-7.07164	1.53109e-12	4.73519e-11
10000	AKT3	2548.85	1.47555	0.208724	7.0694	1.5561e-12	4.80354e-11
374946	DRAXIN	678.018	2.51715	0.356252	7.06564	1.59876e-12	4.91998e-11
6160	RPL31	28719.8	1.13609	0.160793	7.06555	1.59978e-12	4.91998e-11
94241	TP53INP1	3169.13	-1.43749	0.203524	-7.06298	1.62964e-12	5.00251e-11
3843	IPO5	5349.53	-1.35422	0.191877	-7.05775	1.69222e-12	5.18497e-11
5570	PKIB	3848.91	1.42254	0.201617	7.05563	1.71816e-12	5.2547e-11
55754	TMEM30A	6143.04	-1.2625	0.179025	-7.05207	1.76281e-12	5.38131e-11
10916	MAGED2	58251.4	-1.23496	0.175147	-7.05097	1.77669e-12	5.41367e-11
64094	SMOC2	2568.49	-1.89123	0.268445	-7.04512	1.85304e-12	5.63591e-11
3775	KCNK1	780.654	2.4836	0.353112	7.03346	2.01476e-12	6.11412e-11
27018	BEX3	107238	1.13203	0.160953	7.03326	2.01768e-12	6.11412e-11
5069	PAPPA	6623.95	1.84821	0.2628	7.03276	2.02486e-12	6.12464e-11
84188	FAR1	2002.36	-2.00375	0.285134	-7.0274	2.10413e-12	6.35279e-11
7754	ZNF204P	1023.69	2.03106	0.289263	7.02151	2.19488e-12	6.61468e-11
56099	PCDHGB7	1451.73	-1.87411	0.266997	-7.01923	2.23101e-12	6.71131e-11
5024	P2RX3	641.343	2.4922	0.355292	7.01452	2.30745e-12	6.92514e-11
3308	HSPA4	4553.82	-1.49936	0.213757	-7.01433	2.31048e-12	6.92514e-11
5834	PYGB	3398.92	-1.58008	0.225364	-7.01122	2.36248e-12	7.0682e-11
166979	CDC20B	369.334	3.4991	0.499797	7.00105	2.54051e-12	7.58707e-11
341640	FREM2	876.865	2.5093	0.358522	6.99901	2.57779e-12	7.6845e-11
4323	MMP14	478.365	-2.77135	0.396066	-6.99719	2.61138e-12	7.77062e-11
6637	SNRPG	25418	1.11348	0.15916	6.99597	2.63438e-12	7.82496e-11
404672	GTF2H5	8225.42	1.20901	0.172859	6.99421	2.66761e-12	7.89527e-11
28951	TRIB2	4736.88	-1.26812	0.181306	-6.99434	2.66507e-12	7.89527e-11
79825	EFCC1	644.801	2.52505	0.361112	6.99242	2.70191e-12	7.98249e-11
5747	PTK2	6263.41	-1.23038	0.175976	-6.99173	2.71513e-12	8.00721e-11
10765	KDM5B	9603.04	-1.25975	0.180197	-6.99099	2.7295e-12	8.03523e-11
29968	PSAT1	6187.94	-1.44635	0.207169	-6.9815	2.92048e-12	8.58216e-11
23450	SF3B3	4872.14	-1.39335	0.199782	-6.97434	3.07308e-12	9.01454e-11
4696	NDUFA3	6663.36	1.21882	0.174781	6.97343	3.09314e-12	9.0573e-11
9556	C14orf2	18551	1.10999	0.159209	6.97193	3.12625e-12	9.13806e-11
50865	HEBP1	3652.41	1.49978	0.21518	6.96989	3.17193e-12	9.25521e-11
6217	RPS16	13343.2	1.11778	0.160424	6.96771	3.22143e-12	9.38307e-11
4094	MAF	1317.78	1.9188	0.275585	6.96263	3.33967e-12	9.69325e-11
2997	GYS1	2387.04	-1.48479	0.213247	-6.96278	3.33633e-12	9.69325e-11
1036	CDO1	5890.68	1.50904	0.216838	6.9593	3.41961e-12	9.90786e-11
3235	HOXD9	245.809	4.43487	0.637422	6.95751	3.46339e-12	1.00172e-10
57182	ANKRD50	5054.91	-1.43335	0.206047	-6.95641	3.49042e-12	1.00777e-10
51255	RNF181	7119.83	1.19193	0.171404	6.95393	3.55255e-12	1.02392e-10
1499	CTNNB1	7520.58	-1.25519	0.180516	-6.95336	3.56699e-12	1.02629e-10
122786	FRMD6	3823.67	-1.58441	0.227886	-6.95262	3.58551e-12	1.02982e-10
5630	PRPH	608.899	2.63592	0.379401	6.94758	3.71602e-12	1.06545e-10
221981	THSD7A	3949.74	1.31346	0.189417	6.93421	4.08506e-12	1.16923e-10
6400	SEL1L	3651.47	-1.31013	0.188979	-6.93268	4.12952e-12	1.17991e-10
84650	EBPL	6714.01	1.23345	0.177977	6.9304	4.19645e-12	1.19697e-10
54857	GDPD2	411.466	3.38439	0.488946	6.92181	4.45916e-12	1.26852e-10
10319	LAMC3	875.295	-2.22603	0.321601	-6.9217	4.46268e-12	1.26852e-10
5238	PGM3	4282.44	-1.29824	0.18792	-6.90846	4.89942e-12	1.39027e-10
64236	PDLIM2	6299.5	1.22793	0.177886	6.90287	5.09613e-12	1.44361e-10
340665	CYP26C1	230.506	4.72969	0.685365	6.90099	5.16421e-12	1.46039e-10
4313	MMP2	25660	-1.15158	0.166915	-6.8992	5.22962e-12	1.47636e-10
2023	ENO1	33061	-1.14396	0.165886	-6.89606	5.34636e-12	1.50674e-10
54495	TMX3	1397.34	-1.84719	0.268041	-6.89143	5.52335e-12	1.55397e-10
255783	INAFM1	1529.42	1.89296	0.274893	6.88614	5.73246e-12	1.61006e-10
63934	ZNF667	219.642	4.6514	0.675932	6.88146	5.92404e-12	1.66104e-10
2804	GOLGB1	4398.86	-1.53915	0.223699	-6.88046	5.96602e-12	1.6677e-10
5159	PDGFRB	4554.64	-1.60222	0.232866	-6.88041	5.96798e-12	1.6677e-10
29796	UQCR10	17816.4	1.11611	0.162228	6.87991	5.9891e-12	1.67078e-10
2674	GFRA1	5219.85	-1.45382	0.211461	-6.87512	6.1939e-12	1.72499e-10
55246	CCDC25	4372.72	1.37681	0.200531	6.86583	6.61056e-12	1.83794e-10
11337	GABARAP	36425.6	1.05635	0.153889	6.86439	6.67765e-12	1.85347e-10
4695	NDUFA2	7875.18	1.17931	0.171823	6.86353	6.71816e-12	1.86158e-10
55766	H2AFJ	1124.25	1.89734	0.276451	6.86322	6.73261e-12	1.86246e-10
339804	C2orf74	1911.53	1.64003	0.239037	6.86098	6.83887e-12	1.8887e-10
10194	TSHZ1	1531.93	1.9205	0.280116	6.85608	7.07766e-12	1.95138e-10
1630	DCC	2710.22	1.53955	0.224597	6.85473	7.14475e-12	1.96659e-10
9637	FEZ2	1716.94	1.63622	0.238788	6.85218	7.2732e-12	1.99862e-10
7262	PHLDA2	1268.54	-1.74676	0.254978	-6.85065	7.35169e-12	2.01683e-10
4725	NDUFS5	19783.8	1.09607	0.160122	6.84518	7.63805e-12	2.09191e-10
92196	DAPL1	202.086	4.90602	0.716804	6.8443	7.68492e-12	2.09779e-10
23165	NUP205	1783.98	-1.90924	0.278946	-6.84449	7.67506e-12	2.09779e-10
5046	PCSK6	1413.1	-2.08672	0.305065	-6.84025	7.90549e-12	2.15444e-10
8546	AP3B1	2416.53	-1.44199	0.210858	-6.83869	7.99209e-12	2.17445e-10
57326	PBXIP1	3234.08	-1.33267	0.195018	-6.83355	8.28359e-12	2.25006e-10
5327	PLAT	1865.13	-1.72528	0.252673	-6.82809	8.6051e-12	2.33355e-10
55770	EXOC2	1541.79	-1.64468	0.240999	-6.82442	8.82812e-12	2.3901e-10
683	BST1	295.732	4.00228	0.587216	6.81567	9.38223e-12	2.53597e-10
10395	DLC1	9261.97	-1.13284	0.166315	-6.81146	9.66148e-12	2.60718e-10
8862	APLN	1448.92	-1.75714	0.257988	-6.81092	9.69778e-12	2.61271e-10
118	ADD1	9659.64	-1.11889	0.164288	-6.81055	9.72241e-12	2.61507e-10
7134	TNNC1	433.486	2.98575	0.438758	6.80501	1.01044e-11	2.71339e-10
6144	RPL21	51699.2	1.09542	0.161034	6.8024	1.02887e-11	2.75842e-10
89	ACTN3	538.807	2.84929	0.419033	6.79968	1.04854e-11	2.80659e-10
83552	MFRP	2358.55	1.67883	0.246929	6.79882	1.05481e-11	2.81879e-10
196475	RMST	938.634	2.04976	0.301541	6.79762	1.06358e-11	2.83766e-10
3069	HDLBP	17301.2	-1.13863	0.167901	-6.78158	1.18867e-11	3.16627e-10
813	CALU	49548.4	-1.03523	0.152725	-6.77839	1.21523e-11	3.2318e-10
9019	MPZL1	13238.3	-1.05971	0.156677	-6.7637	1.3451e-11	3.57143e-10
51313	FAM198B	2487.2	-1.69632	0.250847	-6.76238	1.35742e-11	3.59836e-10
51275	MAPKAPK5-AS1	2787.58	1.53556	0.227145	6.76028	1.37727e-11	3.64512e-10
445815	PALM2-AKAP2	1424.4	-1.88468	0.27894	-6.75659	1.41276e-11	3.73307e-10
51241	COX16	7061.15	1.20491	0.178546	6.74845	1.49434e-11	3.94233e-10
125144	LRRC75A-AS1	12360.9	1.0745	0.159287	6.74568	1.52313e-11	4.01187e-10
1305	COL13A1	1050.89	-2.25588	0.334472	-6.7446	1.53444e-11	4.03524e-10
148753	FAM163A	300.987	4.41617	0.655131	6.74089	1.57414e-11	4.13306e-10
157769	FAM91A1	2079.28	-1.59916	0.237388	-6.73647	1.62276e-11	4.25395e-10
249	ALPL	273.284	4.31985	0.641528	6.73369	1.65412e-11	4.32928e-10
6782	HSPA13	4847.67	-1.22244	0.181781	-6.72478	1.7586e-11	4.59545e-10
100505503	NA	11840.2	1.08252	0.161132	6.71825	1.83917e-11	4.79841e-10
56993	TOMM22	7531.69	1.1338	0.16892	6.71206	1.9189e-11	4.99853e-10
55605	KIF21A	2077.03	1.52894	0.228081	6.70349	2.03506e-11	5.29276e-10
5335	PLCG1	2120.55	-1.80552	0.269677	-6.69514	2.15464e-11	5.58616e-10
2922	GRP	317.401	-4.82688	0.720944	-6.69522	2.15353e-11	5.58616e-10
22921	MSRB2	4513.35	1.2341	0.184387	6.693	2.18641e-11	5.65654e-10
22925	PLA2R1	635.941	-2.68505	0.401182	-6.69285	2.18863e-11	5.65654e-10
130733	TMEM178A	3165.81	1.31872	0.197056	6.69212	2.19958e-11	5.66711e-10
6234	RPS28	10108	1.09724	0.163959	6.69217	2.19889e-11	5.66711e-10
51398	WDR83OS	15101	1.09545	0.163772	6.68888	2.24884e-11	5.78497e-10
286451	YIPF6	7525.1	1.16755	0.174576	6.68787	2.26437e-11	5.81586e-10
441951	ZFAS1	4327.24	1.23249	0.184326	6.68647	2.28618e-11	5.86276e-10
11197	WIF1	910.078	2.09179	0.312962	6.68384	2.32765e-11	5.95985e-10
57130	ATP13A1	2663.12	-1.36396	0.204241	-6.67817	2.41951e-11	6.1807e-10
5627	PROS1	4798.75	-1.36796	0.204844	-6.67805	2.42138e-11	6.1807e-10
3982	LIM2	254.655	6.55353	0.982004	6.67363	2.49552e-11	6.36011e-10
23511	NUP188	2166.07	-2.46963	0.370104	-6.6728	2.50973e-11	6.38646e-10
25	ABL1	6754.69	-1.1297	0.169314	-6.67222	2.51967e-11	6.40191e-10
10467	ZNHIT1	7277.48	1.11919	0.167823	6.66885	2.5781e-11	6.54029e-10
283659	PRTG	1698.84	1.75259	0.26294	6.66534	2.64057e-11	6.6885e-10
90102	PHLDB2	2478.42	-2.02372	0.303811	-6.66112	2.71746e-11	6.87271e-10
59307	SIGIRR	627.171	2.4448	0.367053	6.66063	2.72657e-11	6.88523e-10
64388	GREM2	535.363	3.05359	0.45859	6.65865	2.76353e-11	6.96789e-10
57486	NLN	2192.66	-1.59574	0.239687	-6.65759	2.7836e-11	7.00779e-10
9968	MED12	1513.23	-2.50838	0.377215	-6.64974	2.93609e-11	7.38044e-10
7163	TPD52	1285.5	2.10643	0.316826	6.64851	2.96066e-11	7.4309e-10
5832	ALDH18A1	6265.83	-1.314	0.197774	-6.64398	3.05331e-11	7.6402e-10
57523	NYNRIN	3116.93	-1.33856	0.201466	-6.6441	3.05081e-11	7.6402e-10
1315	COPB1	10760.1	-1.16264	0.175037	-6.64225	3.08921e-11	7.71835e-10
4967	OGDH	1406.31	-1.63116	0.245661	-6.63988	3.13938e-11	7.83186e-10
9631	NUP155	1105.06	-2.11739	0.318968	-6.63824	3.17442e-11	7.90733e-10
115827	RAB3C	474.33	2.79003	0.420359	6.63726	3.19571e-11	7.94837e-10
5034	P4HB	37176.9	-0.978232	0.147571	-6.62887	3.38267e-11	8.40073e-10
51727	CMPK1	5783.61	-1.23848	0.187174	-6.6167	3.67305e-11	9.10818e-10
22915	MMRN1	2973.66	-1.48628	0.224655	-6.61582	3.69489e-11	9.14858e-10
55729	ATF7IP	3242.65	-1.52774	0.230999	-6.61364	3.74983e-11	9.26272e-10
11217	AKAP2	4609.24	-1.84368	0.278773	-6.61355	3.7522e-11	9.26272e-10
8519	IFITM1	18937.3	1.15495	0.174852	6.60529	3.96743e-11	9.77943e-10
8729	GBF1	2927.83	-1.47508	0.223488	-6.60028	4.10382e-11	1.01005e-09
865	CBFB	4760.08	-1.17784	0.178496	-6.59869	4.14815e-11	1.01945e-09
7857	SCG2	4428.91	-1.54358	0.233963	-6.59756	4.17974e-11	1.02568e-09
29894	CPSF1	3565.9	-1.28559	0.194883	-6.59671	4.20384e-11	1.03007e-09
308	ANXA5	26400.3	-1.34221	0.203486	-6.59605	4.22265e-11	1.03267e-09
26092	TOR1AIP1	2812.99	-1.55704	0.236061	-6.59589	4.22698e-11	1.03267e-09
23659	PLA2G15	2455.42	-1.46509	0.222148	-6.59509	4.2499e-11	1.03674e-09
51566	ARMCX3	9477.73	-1.27863	0.194201	-6.58404	4.5783e-11	1.1152e-09
4522	MTHFD1	2011.43	-1.62129	0.246269	-6.58339	4.59834e-11	1.11843e-09
84058	WDR54	4205.16	1.34186	0.203851	6.58255	4.62437e-11	1.12311e-09
119710	C11orf74	3658.28	1.25799	0.191435	6.57136	4.98585e-11	1.20735e-09
9978	RBX1	20584.9	1.05634	0.160747	6.57143	4.98335e-11	1.20735e-09
57820	CCNB1IP1	2624.49	1.40119	0.213544	6.56161	5.32303e-11	1.28711e-09
64581	CLEC7A	228.385	-4.61274	0.703345	-6.55829	5.44275e-11	1.31414e-09
728239	MAGED4	5011.51	-1.62016	0.247061	-6.55771	5.46396e-11	1.31733e-09
6209	RPS15	24427.2	1.05045	0.160206	6.55686	5.49524e-11	1.32294e-09
841	CASP8	297.352	-4.33045	0.661204	-6.54934	5.77924e-11	1.38929e-09
25975	EGFL6	11294.4	1.50489	0.229871	6.54667	5.88335e-11	1.41226e-09
6223	RPS19	44185.2	1.04063	0.158992	6.54516	5.94316e-11	1.42455e-09
10874	NMU	254.292	4.29928	0.657127	6.54253	6.04856e-11	1.44771e-09
23328	SASH1	3004.53	-1.32734	0.202913	-6.54143	6.09341e-11	1.45633e-09
291	SLC25A4	6692.95	1.1271	0.172342	6.53988	6.15699e-11	1.4694e-09
29128	UHRF1	2124	-1.69745	0.260056	-6.52724	6.69907e-11	1.59647e-09
8038	ADAM12	804.202	-2.6353	0.403793	-6.52635	6.73897e-11	1.60366e-09
3685	ITGAV	3777.85	-1.47426	0.226313	-6.51424	7.3061e-11	1.73612e-09
10472	ZBTB18	627.11	2.3242	0.356829	6.51348	7.343e-11	1.74238e-09
25936	NSL1	6306.95	1.1856	0.18203	6.5132	7.35642e-11	1.74306e-09
26010	SPATS2L	6007.69	-1.27186	0.195385	-6.5095	7.54013e-11	1.78344e-09
8642	DCHS1	4776.62	-1.50681	0.231485	-6.50934	7.54842e-11	1.78344e-09
80760	ITIH5	312.95	-3.15484	0.484719	-6.50859	7.58579e-11	1.78971e-09
3667	IRS1	2656.52	1.61415	0.248025	6.50804	7.61381e-11	1.79375e-09
823	CAPN1	3809.88	-1.30369	0.200335	-6.50754	7.63895e-11	1.79711e-09
79987	SVEP1	1231	1.84603	0.283766	6.50545	7.74592e-11	1.81969e-09
8074	FGF23	1087.7	1.91909	0.295037	6.50459	7.79043e-11	1.82754e-09
1738	DLD	4566.75	-1.36342	0.209852	-6.49705	8.19127e-11	1.91885e-09
7841	MOGS	3623.96	-1.22662	0.188854	-6.49506	8.29987e-11	1.94153e-09
23380	SRGAP2	1618.98	-1.68285	0.259375	-6.48811	8.69216e-11	2.03043e-09
10112	KIF20A	2270.92	-1.56329	0.241016	-6.48627	8.79858e-11	2.05238e-09
1340	COX6B1	14121.3	1.02425	0.157931	6.48539	8.85017e-11	2.0615e-09
84661	DPY30	6973.2	1.14643	0.176841	6.48283	9.00171e-11	2.09385e-09
25777	SUN2	3966.53	-1.32181	0.203901	-6.48257	9.01705e-11	2.09447e-09
124565	SLC38A10	3851.26	-1.26371	0.194951	-6.48221	9.03871e-11	2.09655e-09
7903	ST8SIA4	1365.5	-1.6662	0.257367	-6.47405	9.54093e-11	2.20994e-09
1052	CEBPD	811.908	2.04834	0.316998	6.46167	1.03551e-10	2.39515e-09
6170	RPL39	17705.8	1.13244	0.175261	6.46145	1.03706e-10	2.39539e-09
8364	HIST1H4C	68288.6	1.09071	0.168892	6.45806	1.06052e-10	2.44616e-09
80381	CD276	12439.7	-1.19601	0.185386	-6.45148	1.10765e-10	2.5513e-09
6206	RPS12	12399.1	1.04448	0.161907	6.4511	1.11038e-10	2.55402e-09
6241	RRM2	4737.17	-1.26818	0.196598	-6.45061	1.11397e-10	2.55873e-09
54413	NLGN3	1451.87	-1.78282	0.27657	-6.44616	1.14723e-10	2.63146e-09
57409	MIF4GD	1848.93	1.52804	0.237226	6.44127	1.18478e-10	2.71382e-09
388789	SMIM26	4485.72	1.21044	0.187975	6.43934	1.19996e-10	2.74479e-09
5594	MAPK1	5585.05	-1.2946	0.201109	-6.43731	1.21609e-10	2.77784e-09
8754	ADAM9	5418.03	-1.34518	0.209166	-6.43116	1.26637e-10	2.88869e-09
23557	SNAPIN	7463.44	1.13131	0.175923	6.43074	1.26982e-10	2.88879e-09
11243	PMF1	5989.28	1.12837	0.175465	6.43073	1.26991e-10	2.88879e-09
10963	STIP1	5825.72	-1.12677	0.175361	-6.42545	1.31476e-10	2.9867e-09
10410	IFITM3	37700	1.03854	0.161838	6.41717	1.38827e-10	3.14935e-09
79586	CHPF	9671	-1.07036	0.16687	-6.41437	1.41404e-10	3.20342e-09
9601	PDIA4	30340.4	-1.16742	0.182024	-6.41358	1.42139e-10	3.21566e-09
11157	LSM6	2620.23	1.39194	0.217129	6.41064	1.44911e-10	3.27389e-09
11341	SCRG1	1259.32	-1.6867	0.263178	-6.40895	1.4653e-10	3.30592e-09
80306	MED28	10410.4	1.06492	0.166212	6.407	1.48411e-10	3.34381e-09
4173	MCM4	2935.95	-1.31288	0.205007	-6.40409	1.51268e-10	3.40353e-09
1785	DNM2	4520.9	-1.23544	0.192968	-6.40232	1.5303e-10	3.43849e-09
4147	MATN2	779.282	-2.17926	0.340605	-6.39821	1.57209e-10	3.52759e-09
100192204	PPIAP30	195.775	4.81213	0.752517	6.39471	1.60853e-10	3.60446e-09
29951	PDZRN4	2308.84	1.4778	0.231111	6.39432	1.61268e-10	3.60886e-09
100534595	HNRNPUL2-BSCL2	252.085	-3.78083	0.591441	-6.39257	1.63122e-10	3.64541e-09
23392	KIAA0368	2475.63	-1.67018	0.261451	-6.38811	1.6795e-10	3.74825e-09
2820	GPD2	1179.22	-1.93118	0.302373	-6.38676	1.69432e-10	3.7762e-09
253264	ZNF503-AS1	295.94	3.61347	0.566199	6.38199	1.74805e-10	3.8907e-09
1982	EIF4G2	71344.2	-0.925425	0.145014	-6.38162	1.75229e-10	3.8949e-09
5360	PLTP	12239	-1.04589	0.163906	-6.38103	1.75896e-10	3.90448e-09
1350	COX7C	28122.2	1.09584	0.17175	6.38041	1.76618e-10	3.91522e-09
100529067	SERF2-C15ORF63	5391.65	1.14903	0.180155	6.37801	1.794e-10	3.97157e-09
5453	POU3F1	356.823	2.96221	0.46458	6.3761	1.8165e-10	4.01601e-09
5562	PRKAA1	1244.75	-1.8071	0.283438	-6.37564	1.82196e-10	4.02268e-09
1428	CRYM	688.492	-2.25154	0.3532	-6.3747	1.83324e-10	4.04217e-09
10673	TNFSF13B	2350.92	1.43993	0.225987	6.37175	1.86889e-10	4.1153e-09
9553	MRPL33	6859.18	1.14927	0.180404	6.37054	1.88363e-10	4.14223e-09
10970	CKAP4	20198	-1.01962	0.160092	-6.36892	1.9036e-10	4.17502e-09
4289	MKLN1	2767.53	-1.80651	0.283638	-6.36907	1.90174e-10	4.17502e-09
154810	AMOTL1	3179.38	-1.36668	0.214648	-6.36708	1.92667e-10	4.21519e-09
11004	KIF2C	1606.74	-1.56502	0.245801	-6.36705	1.92702e-10	4.21519e-09
54344	DPM3	1325.87	1.65012	0.259416	6.36092	2.00555e-10	4.38116e-09
130502	TTC32	561.52	2.33829	0.367627	6.36049	2.01107e-10	4.38743e-09
6152	RPL24	14105	1.07984	0.169881	6.35646	2.06451e-10	4.49808e-09
2281	FKBP1B	3432.67	1.26278	0.198719	6.3546	2.08973e-10	4.54703e-09
54460	MRPS21	9602.32	1.05778	0.166525	6.35208	2.12422e-10	4.61599e-09
153571	C5orf38	592.468	2.25802	0.355652	6.34897	2.16766e-10	4.7042e-09
1656	DDX6	3406.12	-1.3061	0.205846	-6.34505	2.2236e-10	4.81926e-09
7381	UQCRB	9844.81	1.05415	0.166242	6.34106	2.28188e-10	4.93274e-09
22865	SLITRK3	366.77	-2.77198	0.437149	-6.34106	2.28193e-10	4.93274e-09
3838	KPNA2	17527.4	-1.18879	0.187495	-6.34036	2.29227e-10	4.94861e-09
27286	SRPX2	548.733	-2.54172	0.400966	-6.33898	2.31289e-10	4.98659e-09
80031	SEMA6D	4160.41	-1.27213	0.200769	-6.33629	2.35362e-10	5.0678e-09
8455	ATRN	1443.79	-1.70724	0.269518	-6.33442	2.38238e-10	5.12304e-09
57216	VANGL2	2487.24	1.45701	0.230074	6.3328	2.40756e-10	5.17047e-09
30061	SLC40A1	1841.39	-2.03047	0.320769	-6.33	2.45162e-10	5.25824e-09
10123	ARL4C	3718.56	1.95776	0.30952	6.32517	2.52957e-10	5.41839e-09
4047	LSS	5995.64	-1.09496	0.173291	-6.31859	2.63962e-10	5.64681e-09
11013	TMSB15A	13934.4	1.08692	0.172144	6.31399	2.71939e-10	5.80775e-09
6227	RPS21	7392.78	1.0655	0.168757	6.31384	2.72189e-10	5.80775e-09
57821	CCDC181	614.311	2.47802	0.392778	6.30896	2.8091e-10	5.9861e-09
2537	IFI6	2372.76	1.33702	0.212061	6.30489	2.88397e-10	6.13773e-09
55505	NOP10	12132.5	0.998218	0.158343	6.30416	2.89769e-10	6.15899e-09
7923	HSD17B8	524.972	2.5893	0.410829	6.30263	2.92631e-10	6.21182e-09
4118	MAL	1332.09	13.0381	2.06877	6.30233	2.93206e-10	6.21605e-09
8553	BHLHE40	569.202	-2.50202	0.397124	-6.30034	2.96998e-10	6.28836e-09
348174	CLEC18A	366.858	2.96767	0.471308	6.29667	3.04112e-10	6.43075e-09
4854	NOTCH3	13082.4	-1.37212	0.217978	-6.29474	3.07919e-10	6.49837e-09
25921	ZDHHC5	1979.17	-1.60136	0.2544	-6.29465	3.08097e-10	6.49837e-09
6157	RPL27A	20617.7	1.02534	0.162923	6.29343	3.10524e-10	6.54121e-09
131118	DNAJC19	5161.18	1.22435	0.194573	6.29251	3.12371e-10	6.57173e-09
790	CAD	1130.82	-1.74262	0.277026	-6.29046	3.16528e-10	6.65072e-09
27295	PDLIM3	1003.72	-2.06723	0.328662	-6.28984	3.17798e-10	6.66891e-09
6727	SRP14	61589.5	1.0215	0.162557	6.28396	3.30062e-10	6.91748e-09
23524	SRRM2	8572.72	-1.15708	0.184182	-6.28228	3.33649e-10	6.97495e-09
57148	RALGAPB	1529.27	-1.69235	0.269384	-6.28229	3.33618e-10	6.97495e-09
6876	TAGLN	28015	1.045	0.166609	6.2722	3.55993e-10	7.43264e-09
440193	CCDC88C	630.828	2.47228	0.394183	6.27191	3.56641e-10	7.43677e-09
4686	NCBP1	2585.3	-1.5526	0.247652	-6.26928	3.62711e-10	7.55381e-09
100188893	TOMM6	8802.07	1.10063	0.175732	6.26313	3.77328e-10	7.84834e-09
6122	RPL3	60968.2	0.906674	0.14481	6.26113	3.82206e-10	7.9337e-09
347902	AMIGO2	1729.04	-1.60838	0.256887	-6.26105	3.82393e-10	7.9337e-09
84873	ADGRG7	3372.95	-1.56169	0.249571	-6.2575	3.91186e-10	8.10594e-09
57648	KIAA1522	533.142	2.60902	0.417008	6.25652	3.93656e-10	8.14691e-09
283212	KLHL35	614.086	2.19721	0.351276	6.25494	3.97665e-10	8.21956e-09
3643	INSR	1491.65	1.57269	0.251519	6.25277	4.03238e-10	8.32434e-09
684	BST2	1020.39	2.02013	0.323222	6.24998	4.10502e-10	8.46373e-09
254863	TMEM256	3175.16	1.26949	0.203177	6.24821	4.15184e-10	8.54959e-09
1745	DLX1	1281.12	-1.90974	0.305853	-6.24399	4.26535e-10	8.77239e-09
200185	KRTCAP2	7139.9	1.07209	0.171723	6.24312	4.28923e-10	8.81052e-09
57333	RCN3	1652.73	1.50579	0.241219	6.24239	4.30937e-10	8.8409e-09
6169	RPL38	16186	1.04519	0.16744	6.24217	4.31544e-10	8.84238e-09
56892	C8orf4	823.329	-2.09198	0.335293	-6.23925	4.39675e-10	8.99782e-09
5066	PAM	19966.7	-0.969073	0.155508	-6.23167	4.61495e-10	9.43266e-09
641638	SNHG6	2976.06	1.34631	0.216356	6.22267	4.88768e-10	9.97775e-09
6210	RPS15A	15603	0.999454	0.160634	6.22195	4.91024e-10	1.00114e-08
5532	PPP3CB	1917.77	1.42535	0.22914	6.22042	4.95811e-10	1.00966e-08
6272	SORT1	3632.35	-1.18952	0.19125	-6.2197	4.98115e-10	1.0131e-08
6237	RRAS	6746.72	1.08631	0.174678	6.21892	5.00591e-10	1.01688e-08
152217	NCBP2-AS2	5756.12	1.12132	0.180521	6.21156	5.24616e-10	1.06435e-08
4288	MKI67	2076.26	-1.40642	0.226426	-6.21137	5.25245e-10	1.06435e-08
4710	NDUFB4	13353.9	1.02503	0.165041	6.21079	5.27175e-10	1.06695e-08
9654	TTLL4	1491.95	-1.70902	0.275206	-6.20996	5.29969e-10	1.07129e-08
100133941	CD24	13837.6	1.40224	0.22583	6.2093	5.32227e-10	1.07454e-08
10061	ABCF2	2152.6	-1.47095	0.236939	-6.20814	5.36165e-10	1.08117e-08
100505702	LINC01094	1870.02	1.45099	0.233832	6.20527	5.4604e-10	1.09974e-08
252995	FNDC5	1039.02	2.05473	0.33119	6.20408	5.5017e-10	1.10671e-08
10882	C1QL1	1654.31	1.88553	0.304047	6.20144	5.59477e-10	1.12406e-08
4436	MSH2	2301.82	-1.37607	0.221936	-6.20027	5.6367e-10	1.13111e-08
723961	INS-IGF2	6319.12	1.17215	0.189079	6.19924	5.67359e-10	1.13713e-08
6721	SREBF2	7306.67	-1.13898	0.183763	-6.1981	5.71505e-10	1.14405e-08
10542	LAMTOR5	17361.7	0.965571	0.155803	6.19736	5.74174e-10	1.148e-08
4884	NPTX1	329.565	3.13442	0.505961	6.19498	5.82925e-10	1.16409e-08
55183	RIF1	2474.04	-1.38579	0.223706	-6.19471	5.83941e-10	1.16471e-08
8091	HMGA2	9627.61	1.04306	0.168404	6.19375	5.87478e-10	1.17035e-08
694	BTG1	10004.2	1.04587	0.168938	6.19081	5.98564e-10	1.191e-08
8884	SLC5A6	3228.11	-1.21644	0.196545	-6.1891	6.05106e-10	1.20257e-08
4942	OAT	6428.24	-1.34597	0.217653	-6.18402	6.24901e-10	1.24041e-08
51234	EMC4	13455.7	0.967371	0.156604	6.17718	6.52563e-10	1.29377e-08
5592	PRKG1	2166.64	-1.58049	0.255893	-6.17637	6.55938e-10	1.2989e-08
6222	RPS18	35727	0.916309	0.148448	6.1726	6.71747e-10	1.32861e-08
6156	RPL30	18512.9	1.1364	0.184257	6.1675	6.93784e-10	1.37056e-08
84681	HINT2	2994.38	1.27399	0.20684	6.15931	7.30615e-10	1.44159e-08
23261	CAMTA1	7598.86	1.05344	0.171148	6.15514	7.50114e-10	1.4783e-08
56889	TM9SF3	12862.5	-0.992831	0.161311	-6.15478	7.51836e-10	1.47992e-08
150291	MORC2-AS1	1631.57	1.52456	0.247886	6.15023	7.73703e-10	1.52115e-08
84720	PIGO	1350.67	-1.54197	0.250763	-6.14911	7.79213e-10	1.53017e-08
389541	LAMTOR4	7529.3	1.03767	0.16882	6.14661	7.91562e-10	1.55257e-08
10581	IFITM2	8146.5	1.06297	0.172959	6.1458	7.95592e-10	1.55678e-08
64782	AEN	2460.31	-1.27599	0.207617	-6.14587	7.95275e-10	1.55678e-08
83690	CRISPLD1	6033.13	-1.13035	0.183931	-6.14549	7.97162e-10	1.558e-08
50854	C6orf48	3067.16	1.21856	0.198326	6.14423	8.03526e-10	1.56859e-08
58528	RRAGD	1888.84	1.62484	0.264483	6.14346	8.07429e-10	1.57434e-08
22907	DHX30	4331.2	-1.1382	0.185354	-6.14071	8.21515e-10	1.59992e-08
6137	RPL13	26767.4	0.922323	0.150223	6.13968	8.26877e-10	1.60847e-08
1649	DDIT3	2122.03	1.38069	0.224939	6.13808	8.35261e-10	1.62286e-08
10428	CFDP1	8098.55	1.07151	0.174701	6.13337	8.60389e-10	1.66776e-08
5198	PFAS	1371.34	-1.55815	0.254039	-6.13349	8.59713e-10	1.66776e-08
23070	CMTR1	1199.94	-1.68669	0.275064	-6.13198	8.67913e-10	1.68037e-08
6233	RPS27A	22728.4	1.04731	0.170898	6.12828	8.88365e-10	1.71796e-08
4726	NDUFS6	7610.97	1.0755	0.175544	6.12664	8.97542e-10	1.73367e-08
5430	POLR2A	3170.6	-1.34453	0.21947	-6.12628	8.99564e-10	1.73555e-08
3980	LIG3	1553.62	-1.53424	0.250655	-6.12094	9.30243e-10	1.79264e-08
6048	RNF5	9933.69	1.02968	0.16824	6.12031	9.3394e-10	1.79767e-08
100506844	LOC100506844	1936.15	1.50061	0.245256	6.11855	9.4432e-10	1.81342e-08
129868	TRIM43	71.8574	-7.08627	1.15815	-6.11863	9.4384e-10	1.81342e-08
6238	RRBP1	4001.34	-1.22625	0.200446	-6.11759	9.49982e-10	1.82218e-08
84498	FAM120B	1546.93	-1.52191	0.248817	-6.11657	9.56105e-10	1.83179e-08
83982	IFI27L2	2192.9	1.33285	0.217993	6.11418	9.70573e-10	1.85736e-08
4761	NEUROD2	715.965	2.03218	0.332651	6.10904	1.00232e-09	1.91589e-08
6613	SUMO2	46363.5	0.999322	0.163747	6.10286	1.04189e-09	1.98923e-08
55920	RCC2	4967.87	-1.23349	0.202124	-6.10263	1.04335e-09	1.98971e-08
9131	AIFM1	2461.7	-1.50242	0.246247	-6.10127	1.05227e-09	2.0044e-08
6633	SNRPD2	22018.2	0.933132	0.152987	6.09943	1.06446e-09	2.02529e-08
6141	RPL18	20668.8	0.9716	0.159324	6.09827	1.07223e-09	2.03773e-08
23077	MYCBP2	2574.21	1.32586	0.217443	6.09751	1.07733e-09	2.04507e-08
22821	RASA3	1445.32	-1.62122	0.265949	-6.09598	1.08769e-09	2.06237e-08
8615	USO1	3338.11	-1.23364	0.202385	-6.0955	1.09096e-09	2.06619e-08
11095	ADAMTS8	275.284	3.35148	0.549922	6.09446	1.09805e-09	2.07724e-08
50	ACO2	4738.67	-1.08795	0.178577	-6.09234	1.11273e-09	2.10259e-08
23193	GANAB	10229.6	-1.36651	0.224356	-6.0908	1.1235e-09	2.1181e-08
8693	GALNT4	489.802	-2.24404	0.368426	-6.0909	1.1228e-09	2.1181e-08
55701	ARHGEF40	5578.5	-1.10951	0.182337	-6.08492	1.16549e-09	2.19476e-08
7320	UBE2B	5760.74	1.09848	0.180749	6.0774	1.22143e-09	2.29749e-08
11202	KLK8	149.681	5.45719	0.898235	6.07546	1.23632e-09	2.32285e-08
23089	PEG10	16594.3	-0.989778	0.163098	-6.06861	1.29024e-09	2.4214e-08
280636	SELENOH	9391.3	1.04885	0.172864	6.06749	1.29929e-09	2.43561e-08
51639	SF3B6	12993.8	1.15306	0.190074	6.06634	1.30855e-09	2.4502e-08
23139	MAST2	1867.23	-1.45017	0.23909	-6.06538	1.31641e-09	2.46213e-08
4707	NDUFB1	6622.39	1.11313	0.183649	6.06117	1.35134e-09	2.52173e-08
7145	TNS1	1109.93	-2.17562	0.358938	-6.06128	1.35041e-09	2.52173e-08
57661	PHRF1	1219.73	-1.71502	0.282968	-6.06083	1.35419e-09	2.5242e-08
23244	PDS5A	3335.9	-1.17763	0.194377	-6.05848	1.3741e-09	2.55843e-08
1290	COL5A2	26495.7	-0.989779	0.163458	-6.05526	1.40189e-09	2.60723e-08
149175	MANEAL	1561.59	1.59631	0.263686	6.05382	1.41453e-09	2.62778e-08
4242	MFNG	1451.41	6.02343	0.99602	6.04751	1.47106e-09	2.72972e-08
7520	XRCC5	13915.9	-1.09024	0.180288	-6.04721	1.47379e-09	2.73172e-08
9685	CLINT1	3839	-1.2529	0.207297	-6.044	1.50335e-09	2.7834e-08
25915	NDUFAF3	8279.89	1.00745	0.166692	6.04381	1.50514e-09	2.78357e-08
699	BUB1	1343.6	-1.64767	0.272655	-6.04307	1.51209e-09	2.7933e-08
1655	DDX5	29162.1	-1.31407	0.217517	-6.04126	1.52915e-09	2.82166e-08
150465	TTL	2124.17	-1.36397	0.225943	-6.03679	1.57209e-09	2.89767e-08
154467	CCDC167	4174.69	1.13672	0.188392	6.03379	1.60162e-09	2.9488e-08
6229	RPS24	12424.6	0.99326	0.164626	6.03343	1.60519e-09	2.95208e-08
9244	CRLF1	1440.21	1.72044	0.285307	6.03013	1.63832e-09	3.00965e-08
23344	ESYT1	4039.64	-1.32586	0.219957	-6.02783	1.66173e-09	3.04927e-08
716	C1S	1410.04	-1.99143	0.330393	-6.02746	1.66559e-09	3.05297e-08
51504	TRMT112	14104	1.08998	0.180905	6.02517	1.68934e-09	3.09307e-08
4089	SMAD4	4642.15	-1.39168	0.231042	-6.02352	1.70663e-09	3.12125e-08
349136	WDR86	1844.86	1.42409	0.236501	6.02152	1.72782e-09	3.15652e-08
4201	MEA1	10273.3	0.979371	0.162792	6.01609	1.78683e-09	3.26071e-08
4891	SLC11A2	3290.49	-1.29627	0.215605	-6.01222	1.83001e-09	3.33582e-08
309	ANXA6	6690.33	-1.24606	0.207281	-6.01145	1.83873e-09	3.34803e-08
83658	DYNLRB1	9634.76	0.97056	0.161581	6.00664	1.89408e-09	3.44502e-08
80303	EFHD1	2599.4	1.4206	0.236634	6.00335	1.93289e-09	3.51174e-08
55352	COPRS	5657.96	1.04738	0.174477	6.00297	1.93735e-09	3.51598e-08
116362	RBP7	220.185	3.61737	0.602692	6.00201	1.94885e-09	3.53295e-08
6165	RPL35A	23940.8	0.960504	0.160205	5.99546	2.02911e-09	3.67443e-08
2057	EPOR	1072.4	1.6962	0.282942	5.99486	2.03666e-09	3.68405e-08
5825	ABCD3	2545.95	-1.3528	0.225706	-5.99363	2.05209e-09	3.70791e-08
4062	LY6H	941.535	1.88941	0.315364	5.99121	2.08292e-09	3.75539e-08
56062	KLHL4	1049.37	-2.07475	0.346299	-5.99123	2.08265e-09	3.75539e-08
85508	SCRT2	251.829	3.4485	0.575816	5.98888	2.11291e-09	3.80531e-08
56136	PCDHA13	54.5217	-9.89707	1.65278	-5.98813	2.12267e-09	3.81872e-08
4753	NELL2	5317.12	-1.13463	0.189561	-5.98556	2.15651e-09	3.87539e-08
4715	NDUFB9	10674.1	0.976445	0.163164	5.98442	2.17163e-09	3.89832e-08
3188	HNRNPH2	2286.36	-1.60267	0.267827	-5.984	2.17725e-09	3.90416e-08
26130	GAPVD1	2613.47	-1.48415	0.248059	-5.98307	2.1897e-09	3.92222e-08
3313	HSPA9	7345.11	-1.18804	0.198576	-5.98278	2.19366e-09	3.92506e-08
112483	SAT2	3084.03	1.20612	0.201641	5.9815	2.21086e-09	3.95156e-08
1949	EFNB3	4816.71	1.43685	0.240288	5.97967	2.23589e-09	3.99197e-08
23266	ADGRL2	7031.7	-1.08852	0.182087	-5.97803	2.25846e-09	4.02791e-08
11345	GABARAPL2	19692.8	1.0325	0.172834	5.97393	2.31611e-09	4.12627e-08
56948	SDR39U1	4363.51	1.22902	0.205765	5.97294	2.33015e-09	4.14682e-08
11145	PLA2G16	367.587	2.70991	0.453789	5.97174	2.3473e-09	4.17283e-08
6773	STAT2	1702.15	-1.38566	0.232113	-5.96977	2.37589e-09	4.21913e-08
51367	POP5	2369.09	1.29969	0.217751	5.96871	2.39142e-09	4.24214e-08
9689	BZW1	17948.6	-1.06145	0.178111	-5.95952	2.52985e-09	4.48288e-08
182	JAG1	1773.06	-1.43616	0.241055	-5.95782	2.5562e-09	4.52472e-08
9296	ATP6V1F	16984.7	0.963118	0.161735	5.95492	2.60193e-09	4.60073e-08
1329	COX5B	14196.2	1.02082	0.171477	5.9531	2.63116e-09	4.64745e-08
254263	CNIH2	1505.07	1.7208	0.289175	5.95072	2.66973e-09	4.71053e-08
4735	2020-09-02	28479.6	-0.980525	0.164909	-5.94584	2.75046e-09	4.84779e-08
26047	CNTNAP2	5079.65	1.19005	0.200166	5.94534	2.75891e-09	4.8575e-08
3910	LAMA4	3889.1	-1.42024	0.23892	-5.94442	2.77437e-09	4.87951e-08
150678	COPS9	7997.5	1.03627	0.174354	5.94349	2.79011e-09	4.90199e-08
9068	ANGPTL1	337.271	-3.54333	0.596204	-5.94315	2.796e-09	4.90712e-08
26018	LRIG1	1967.06	-1.32725	0.223481	-5.93898	2.86793e-09	5.02801e-08
9865	TRIL	10439.4	-1.09835	0.185037	-5.93583	2.92369e-09	5.12033e-08
11031	RAB31	17431.8	1.03435	0.174298	5.93439	2.94948e-09	5.16003e-08
51086	TNNI3K	21.4974	19.7168	3.32289	5.93363	2.96316e-09	5.17847e-08
63916	ELMO2	3590.72	-1.29722	0.2187	-5.93149	3.002e-09	5.24081e-08
284260	LINC00907	316.559	3.04014	0.512574	5.93113	3.00852e-09	5.24665e-08
5707	PSMD1	9151.18	-1.04285	0.175861	-5.92997	3.02989e-09	5.27833e-08
283869	NPW	329.46	2.8127	0.474689	5.92535	3.11639e-09	5.42331e-08
84191	FAM96A	7381.75	0.994611	0.167873	5.92478	3.12721e-09	5.43642e-08
10725	NFAT5	2733.21	-1.31697	0.222312	-5.92398	3.14245e-09	5.45716e-08
29967	LRP12	3777.01	-1.14987	0.194131	-5.92319	3.15764e-09	5.47777e-08
25891	PAMR1	1203.24	-1.60964	0.271763	-5.92295	3.16213e-09	5.47981e-08
57466	SCAF4	1576.74	-1.5106	0.255052	-5.92269	3.16719e-09	5.48282e-08
2720	GLB1	6064.85	-1.03131	0.174264	-5.91809	3.25693e-09	5.63227e-08
4716	NDUFB10	10547	0.958413	0.162034	5.91489	3.32088e-09	5.73085e-08
701	BUB1B	1691.56	-1.37246	0.232033	-5.91492	3.32041e-09	5.73085e-08
3204	HOXA7	745.018	12.1998	2.06317	5.91314	3.35649e-09	5.78627e-08
2952	GSTT1	1669.69	1.50876	0.255221	5.91157	3.38853e-09	5.8354e-08
10514	MYBBP1A	946.659	-1.90807	0.322794	-5.91112	3.39788e-09	5.84541e-08
6142	RPL18A	24247.3	0.909377	0.15385	5.91081	3.40438e-09	5.8505e-08
10985	GCN1	2215.9	-1.51644	0.256648	-5.90864	3.44939e-09	5.9217e-08
54939	COMMD4	4075.13	1.09511	0.185455	5.90503	3.52584e-09	6.04664e-08
3178	HNRNPA1	51358.4	0.910711	0.154289	5.90263	3.57749e-09	6.12887e-08
91010	FMNL3	3123.22	-1.29321	0.219143	-5.9012	3.60869e-09	6.17591e-08
55013	MCUB	816.686	1.84284	0.312325	5.9004	3.62618e-09	6.19942e-08
2173	FABP7	1391.87	1.74028	0.294968	5.89992	3.63689e-09	6.21129e-08
10752	CHL1	659.717	2.02898	0.343965	5.89881	3.66134e-09	6.24659e-08
649	BMP1	2432.25	-1.35192	0.229216	-5.89802	3.67882e-09	6.26994e-08
10984	KCNQ1OT1	6596.4	1.31062	0.222292	5.89596	3.72503e-09	6.34216e-08
7140	TNNT3	82.9774	5.99042	1.01626	5.89456	3.7567e-09	6.38948e-08
23302	WSCD1	669.219	2.45761	0.417265	5.8898	3.8666e-09	6.56964e-08
7750	ZMYM2	4218.12	-1.63856	0.278248	-5.88883	3.88934e-09	6.60148e-08
51596	CUTA	12571.3	0.970484	0.164826	5.88792	3.91078e-09	6.63105e-08
53358	SHC3	2237.93	1.31914	0.224051	5.88768	3.9165e-09	6.63396e-08
4135	MAP6	4120.7	1.16332	0.197617	5.88673	3.93913e-09	6.66544e-08
6857	SYT1	2065.33	1.34009	0.227654	5.88651	3.9443e-09	6.66736e-08
9620	CELSR1	909.069	1.75343	0.297992	5.88414	4.00137e-09	6.75002e-08
10615	SPAG5	2070.95	-1.53606	0.26105	-5.88416	4.00088e-09	6.75002e-08
22920	KIFAP3	4602.06	-1.4127	0.240154	-5.88247	4.04177e-09	6.8112e-08
25873	RPL36	13738.6	0.92955	0.158028	5.88219	4.04867e-09	6.81588e-08
347730	LRRTM1	461.997	2.39864	0.40805	5.8783	4.14491e-09	6.9708e-08
283229	CRACR2B	276.833	3.30463	0.562329	5.87668	4.18578e-09	7.03236e-08
2149	F2R	13108.8	-1.10926	0.188817	-5.87477	4.23423e-09	7.10653e-08
342897	NCCRP1	257.851	3.54171	0.602977	5.8737	4.26181e-09	7.13999e-08
3572	IL6ST	5660.68	-1.16396	0.198165	-5.87366	4.26281e-09	7.13999e-08
6591	SNAI2	11412.4	-0.968747	0.164993	-5.87144	4.32033e-09	7.229e-08
824	CAPN2	8572.02	-1.00435	0.171066	-5.87112	4.32861e-09	7.23552e-08
4000	LMNA	4045.07	-1.08427	0.184706	-5.87028	4.35051e-09	7.26477e-08
8658	TNKS	2600.38	-1.20732	0.205706	-5.86916	4.38003e-09	7.30669e-08
7114	TMSB4X	528101	0.886827	0.151248	5.86339	4.53508e-09	7.5577e-08
54700	RRN3	1379.07	-1.55608	0.265428	-5.86255	4.55801e-09	7.58825e-08
57161	PELI2	729.066	1.90229	0.324567	5.861	4.60086e-09	7.65188e-08
22949	PTGR1	2746.54	1.46562	0.250153	5.85887	4.66015e-09	7.74269e-08
11253	MAN1B1	3827.52	-1.18454	0.202187	-5.85864	4.66669e-09	7.74576e-08
116135	LRRC3B	515.826	-3.71442	0.634185	-5.85699	4.71329e-09	7.81527e-08
9375	TM9SF2	11538.9	-1.03422	0.176697	-5.85309	4.82528e-09	7.99293e-08
359948	IRF2BP2	3668.69	1.16195	0.198593	5.85092	4.88852e-09	8.08956e-08
26043	UBXN7	2950.5	-1.46057	0.249803	-5.84691	5.0079e-09	8.27883e-08
5549	PRELP	573.947	-2.33772	0.400154	-5.84205	5.15633e-09	8.51567e-08
6829	SUPT5H	3774.05	-1.1834	0.202629	-5.84025	5.21233e-09	8.59957e-08
5725	PTBP1	8026.06	-0.970352	0.166217	-5.83787	5.28724e-09	8.71445e-08
2591	GALNT3	236.636	4.0875	0.700211	5.83753	5.29819e-09	8.7238e-08
116540	MRPL53	1810.5	1.3446	0.230558	5.83191	5.47956e-09	9.01344e-08
1121	CHM	1305.03	-1.62983	0.279587	-5.82942	5.56196e-09	9.13987e-08
5094	PCBP2	6171.3	1.06508	0.182819	5.82586	5.68196e-09	9.32779e-08
3006	HIST1H1C	3481.67	1.34423	0.230835	5.82336	5.76764e-09	9.45905e-08
7272	TTK	948.39	-1.66811	0.286478	-5.82281	5.78657e-09	9.48067e-08
146691	TOM1L2	1072.98	-1.72076	0.295614	-5.82097	5.85077e-09	9.57636e-08
283576	ZDHHC22	618.671	2.65994	0.457235	5.81744	5.97567e-09	9.77111e-08
54872	PIGG	1607.99	-1.37544	0.236578	-5.81389	6.10381e-09	9.97077e-08
57580	PREX1	3056.72	1.30454	0.224447	5.81222	6.1648e-09	1.00505e-07
3312	HSPA8	30471.5	-1.06454	0.183153	-5.81228	6.16291e-09	1.00505e-07
84518	CNFN	234.651	3.40177	0.585427	5.81075	6.2192e-09	1.01292e-07
10459	MAD2L2	7613.06	1.04162	0.17929	5.80968	6.2593e-09	1.01845e-07
55052	MRPL20	6623.05	1.09216	0.188026	5.80856	6.3013e-09	1.0238e-07
48	ACO1	2342.41	-1.42851	0.245936	-5.80847	6.30459e-09	1.0238e-07
4666	NACA	30949.7	0.935378	0.161102	5.80614	6.39303e-09	1.03714e-07
7159	TP53BP2	1582.99	-1.3853	0.238702	-5.80347	6.49582e-09	1.05278e-07
6228	RPS23	22444.5	0.908674	0.156614	5.802	6.553e-09	1.06101e-07
3030	HADHA	6736.56	-1.01507	0.174997	-5.80049	6.61214e-09	1.06953e-07
22872	SEC31A	13392.7	-0.943654	0.162831	-5.79531	6.81958e-09	1.10201e-07
93145	OLFM2	6054.07	1.07206	0.185006	5.79473	6.84297e-09	1.10255e-07
10314	LANCL1	4122.57	-1.14929	0.198333	-5.79476	6.84195e-09	1.10255e-07
10594	PRPF8	6987.6	-1.33083	0.229656	-5.79489	6.83677e-09	1.10255e-07
100129792	CCDC152	679.251	1.97509	0.34086	5.79444	6.85493e-09	1.1034e-07
285888	CNPY1	539.055	2.22513	0.384177	5.79195	6.95748e-09	1.11882e-07
6185	RPN2	20751.4	-0.939074	0.16216	-5.79103	6.99552e-09	1.12384e-07
3020	H3F3A	95604.1	0.986476	0.170391	5.78948	7.06026e-09	1.13314e-07
2956	MSH6	3186.64	-1.51515	0.261822	-5.78693	7.1684e-09	1.14938e-07
124602	KIF19	314.643	3.44035	0.594571	5.78627	7.19659e-09	1.15278e-07
57089	ENTPD7	1468.82	-1.83206	0.316781	-5.78337	7.32202e-09	1.17174e-07
2828	GPR4	399.419	2.54913	0.44089	5.78177	7.39166e-09	1.18174e-07
5204	PFDN5	12380.6	0.947307	0.163977	5.77707	7.60144e-09	1.21293e-07
55002	TMCO3	4241.2	-1.41157	0.244336	-5.77718	7.59614e-09	1.21293e-07
401024	FSIP2	141.61	4.2105	0.728873	5.77672	7.61687e-09	1.21421e-07
9688	NUP93	4356.7	-1.06898	0.185114	-5.77474	7.70731e-09	1.22745e-07
9581	PREPL	1885.08	-1.3715	0.237508	-5.77453	7.71689e-09	1.22779e-07
25962	KIAA1429	1103.99	-1.56405	0.270963	-5.77218	7.8251e-09	1.24381e-07
23646	PLD3	43393.9	-0.928281	0.160893	-5.76955	7.94853e-09	1.26221e-07
1337	COX6A1	32258.2	0.915645	0.158713	5.76919	7.96515e-09	1.26364e-07
94122	SYTL5	228.341	-3.28045	0.568692	-5.76841	8.00209e-09	1.26828e-07
5976	UPF1	1773.5	-1.5352	0.266168	-5.76777	8.0325e-09	1.27188e-07
5796	PTPRK	1895.74	-1.33049	0.23072	-5.76669	8.08442e-09	1.27887e-07
6631	SNRPC	15730.3	0.916335	0.158932	5.76559	8.13704e-09	1.28596e-07
97	ACYP1	970.189	1.82562	0.316931	5.7603	8.3966e-09	1.32572e-07
10516	FBLN5	5479.22	1.25288	0.217514	5.75998	8.41246e-09	1.32695e-07
58158	NEUROD4	181.676	6.71673	1.16627	5.75916	8.45335e-09	1.33143e-07
2181	ACSL3	5328.86	-1.26527	0.219704	-5.75897	8.46286e-09	1.33143e-07
9870	AREL1	1756.25	-1.37016	0.237919	-5.75893	8.46505e-09	1.33143e-07
6990	DYNLT3	1170.12	-1.60518	0.278758	-5.75832	8.49563e-09	1.33438e-07
7093	TLL2	451.177	-3.66094	0.635775	-5.75823	8.49997e-09	1.33438e-07
6993	DYNLT1	16996.9	0.921198	0.159993	5.75775	8.52439e-09	1.33694e-07
57805	CCAR2	4981.17	-1.03511	0.179786	-5.75746	8.53893e-09	1.33795e-07
51529	ANAPC11	12223.9	0.918994	0.159665	5.75575	8.62579e-09	1.35028e-07
3226	HOXC10	347.341	8.65506	1.50408	5.75438	8.69582e-09	1.3595e-07
8663	EIF3C	8781.79	-1.09962	0.191095	-5.75428	8.7011e-09	1.3595e-07
858	CAV2	2037.82	1.29259	0.224708	5.75229	8.80437e-09	1.37433e-07
6139	RPL17	19349.9	0.886427	0.154145	5.7506	8.89251e-09	1.38678e-07
127687	C1orf122	7980.34	0.957718	0.16655	5.75034	8.90618e-09	1.3876e-07
8721	EDF1	10763.6	0.922436	0.160445	5.74923	8.96503e-09	1.39545e-07
8683	SRSF9	24624.8	0.895138	0.155718	5.74844	9.00692e-09	1.40065e-07
5927	KDM5A	3189.39	-1.36514	0.237537	-5.74705	9.08125e-09	1.41088e-07
127003	C1orf194	152.019	5.48633	0.954662	5.74688	9.09074e-09	1.41103e-07
10479	SLC9A6	1750.37	-1.46737	0.255586	-5.74119	9.40141e-09	1.45788e-07
6638	SNRPN	30811.3	0.867139	0.151058	5.74042	9.44412e-09	1.46313e-07
27289	RND1	747.098	1.94068	0.338124	5.73956	9.49248e-09	1.46924e-07
26133	TRPC4AP	7446.61	-1.11042	0.193505	-5.73846	9.55404e-09	1.47739e-07
25789	TMEM59L	2441.25	1.28125	0.223374	5.73591	9.69887e-09	1.49838e-07
55089	SLC38A4	656.316	2.0435	0.356551	5.73128	9.96769e-09	1.53847e-07
221178	SPATA13	1011.94	-1.59761	0.278973	-5.72676	1.02366e-08	1.5785e-07
51643	TMBIM4	5656.31	1.09725	0.191608	5.72653	1.02503e-08	1.57914e-07
126328	NDUFA11	13467.3	0.906607	0.158343	5.72558	1.03079e-08	1.58505e-07
55748	CNDP2	3677.9	-1.13274	0.197835	-5.72567	1.03029e-08	1.58505e-07
91612	CHURC1	6771.29	1.04531	0.182636	5.72347	1.04372e-08	1.60344e-07
8662	EIF3B	7446.3	-1.00715	0.176017	-5.72189	1.05344e-08	1.61687e-07
79709	COLGALT1	4376.79	-1.21286	0.211995	-5.72117	1.05792e-08	1.62224e-07
23386	NUDCD3	3841.43	-1.08436	0.189607	-5.71898	1.07168e-08	1.64182e-07
3899	AFF3	3960.45	-1.0638	0.186034	-5.71829	1.07599e-08	1.64689e-07
92912	UBE2Q2	2566.91	-1.17405	0.20533	-5.71786	1.07871e-08	1.64953e-07
23019	CNOT1	5441.57	1.08924	0.190548	5.71634	1.08846e-08	1.66289e-07
8936	WASF1	9547.35	0.937104	0.16395	5.71579	1.09196e-08	1.6667e-07
4214	MAP3K1	1118.99	-1.68014	0.293973	-5.7153	1.09511e-08	1.66997e-07
56479	KCNQ5	197.26	-5.44348	0.952882	-5.71265	1.1123e-08	1.69462e-07
5757	PTMA	53520.6	0.968201	0.16951	5.71177	1.11808e-08	1.70186e-07
84858	ZNF503	1210.05	1.57991	0.276786	5.70804	1.14282e-08	1.7379e-07
4440	MSI1	786.005	1.82176	0.319284	5.70576	1.15827e-08	1.75978e-07
5021	OXTR	532.635	2.1105	0.370269	5.6999	1.19875e-08	1.81962e-07
7360	UGP2	4638.42	-1.51374	0.265612	-5.69908	1.20454e-08	1.82672e-07
255758	TCTEX1D2	2726.28	1.25811	0.220771	5.69872	1.20713e-08	1.82897e-07
4694	NDUFA1	19010.9	0.998888	0.175312	5.69779	1.21373e-08	1.83729e-07
9777	TM9SF4	3811.06	-1.27684	0.224156	-5.69621	1.22501e-08	1.85266e-07
8722	CTSF	574.41	11.8246	2.0765	5.69452	1.23718e-08	1.86935e-07
4885	NPTX2	1097.8	1.74041	0.305772	5.69186	1.2566e-08	1.89695e-07
56896	DPYSL5	4516.57	1.11069	0.195149	5.69153	1.25909e-08	1.89899e-07
1280	COL2A1	39319.8	-1.00338	0.176311	-5.69096	1.26324e-08	1.90351e-07
4651	MYO10	3053.76	-1.27938	0.224882	-5.6891	1.27711e-08	1.92264e-07
1382	CRABP2	19160.2	0.897689	0.157876	5.68603	1.30027e-08	1.95573e-07
140823	ROMO1	11450.6	0.965329	0.169798	5.68515	1.30697e-08	1.96224e-07
9180	OSMR	931.692	-2.37364	0.417511	-5.68522	1.30648e-08	1.96224e-07
286204	CRB2	401.121	2.46759	0.43417	5.68348	1.31982e-08	1.97972e-07
1261	CNGA3	174.511	4.40794	0.776171	5.67908	1.35422e-08	2.02948e-07
10570	DPYSL4	1231.05	1.52604	0.268929	5.67451	1.39084e-08	2.08247e-07
10982	MAPRE2	5735.77	-1.04306	0.183836	-5.67389	1.39592e-08	2.08751e-07
54704	PDP1	1272.43	-1.47765	0.260434	-5.67379	1.39673e-08	2.08751e-07
7048	TGFBR2	2111.59	-1.67422	0.2951	-5.67338	1.40008e-08	2.08873e-07
23127	COLGALT2	625.076	-1.94331	0.342523	-5.67353	1.39888e-08	2.08873e-07
340273	ABCB5	345.586	2.9724	0.524033	5.67215	1.41014e-08	2.10132e-07
23042	PDXDC1	4587.36	-1.31043	0.231032	-5.67204	1.41106e-08	2.10132e-07
3836	KPNA1	3700.98	-1.31598	0.232069	-5.67062	1.42278e-08	2.11686e-07
25837	RAB26	346.874	3.24634	0.572866	5.66683	1.45461e-08	2.16227e-07
85236	HIST1H2BK	4004.97	1.10369	0.19477	5.66665	1.45617e-08	2.16265e-07
9723	SEMA3E	518.437	-2.06337	0.364245	-5.66477	1.47218e-08	2.18446e-07
6585	SLIT1	1406.89	1.70055	0.300215	5.66445	1.47498e-08	2.18665e-07
2004	ELK3	1923.89	-1.47116	0.25979	-5.6629	1.48836e-08	2.20451e-07
7388	UQCRH	11219.8	0.905936	0.160108	5.65829	1.52893e-08	2.26257e-07
4809	SNU13	15793.8	0.909734	0.160834	5.65634	1.54635e-08	2.2863e-07
9175	MAP3K13	4121.43	1.18954	0.210314	5.65601	1.54929e-08	2.2886e-07
9891	NUAK1	4738.24	1.10151	0.194868	5.65256	1.58072e-08	2.33293e-07
23682	RAB38	394.886	2.47167	0.437345	5.65154	1.5902e-08	2.34484e-07
80012	PHC3	946.129	-1.62474	0.287541	-5.65045	1.60028e-08	2.3576e-07
51068	NMD3	1971.8	-1.44477	0.25577	-5.64871	1.6166e-08	2.37951e-07
6720	SREBF1	1006.71	-1.62103	0.287103	-5.64616	1.64075e-08	2.41291e-07
84271	POLDIP3	4618.03	-1.32937	0.23547	-5.64559	1.64615e-08	2.4187e-07
90355	C5orf30	1750.71	-1.47219	0.260802	-5.64487	1.65305e-08	2.42668e-07
54206	ERRFI1	3323.65	-1.11681	0.19786	-5.64446	1.657e-08	2.43032e-07
9552	SPAG7	9716.87	0.947369	0.167855	5.64397	1.66173e-08	2.4351e-07
374969	SVBP	4713.06	1.08064	0.191516	5.64253	1.67569e-08	2.4512e-07
6154	RPL26	12277.2	0.95713	0.169627	5.64255	1.67546e-08	2.4512e-07
4319	MMP10	1318.62	-1.76157	0.312217	-5.64213	1.67961e-08	2.45476e-07
6102	RP2	1050.87	-1.56148	0.276816	-5.64084	1.69225e-08	2.47104e-07
5708	PSMD2	18045.9	-0.900657	0.159682	-5.64031	1.69747e-08	2.47648e-07
10097	ACTR2	8037.05	-1.14863	0.203667	-5.63973	1.70314e-08	2.48255e-07
9246	UBE2L6	8252.96	1.00951	0.179015	5.63923	1.70815e-08	2.48767e-07
90701	SEC11C	4746.23	1.05001	0.186281	5.63671	1.73332e-08	2.5221e-07
203522	INTS6L	502.556	-2.29916	0.408109	-5.63369	1.76391e-08	2.56435e-07
6167	RPL37	15048.6	0.993113	0.176553	5.62501	1.85502e-08	2.69443e-07
57506	MAVS	2816.35	-1.1435	0.203431	-5.62104	1.89812e-08	2.75462e-07
51655	RASD1	263.599	2.98946	0.532094	5.6183	1.92851e-08	2.79625e-07
5328	PLAU	4056.46	-1.07291	0.190989	-5.61769	1.93533e-08	2.80368e-07
5438	POLR2I	5392.81	1.04801	0.186606	5.61619	1.95215e-08	2.82557e-07
10580	SORBS1	2166.09	-1.21294	0.216121	-5.61231	1.99639e-08	2.88708e-07
29978	UBQLN2	4303.69	-1.12809	0.201092	-5.60981	2.02548e-08	2.92657e-07
79652	TMEM204	904.489	1.65781	0.295584	5.6086	2.0397e-08	2.94216e-07
7412	VCAM1	1084.91	-1.57097	0.280101	-5.60859	2.03983e-08	2.94216e-07
146	ADRA1D	254.389	3.06305	0.546161	5.60832	2.043e-08	2.94417e-07
64132	XYLT2	1646.31	-1.60946	0.287178	-5.6044	2.08983e-08	3.00902e-07
6443	SGCB	6743.73	-0.974355	0.173878	-5.60366	2.09873e-08	3.01921e-07
388585	HES5	311.098	8.49581	1.51659	5.60192	2.11989e-08	3.04699e-07
55243	KIRREL	2676.85	-1.53788	0.274552	-5.60143	2.12589e-08	3.05296e-07
8817	FGF18	464.419	2.27905	0.406897	5.60107	2.13037e-08	3.05481e-07
23400	ATP13A2	4274.07	-1.11996	0.199956	-5.60103	2.13087e-08	3.05481e-07
6421	SFPQ	8142.75	-0.96925	0.173088	-5.59974	2.14674e-08	3.07488e-07
6128	RPL6	17221.4	0.966248	0.172602	5.59812	2.16692e-08	3.1011e-07
1813	DRD2	311.587	2.92428	0.522438	5.59738	2.17618e-08	3.11166e-07
22807	IKZF2	411.189	2.48031	0.443294	5.59518	2.20392e-08	3.14859e-07
6158	RPL28	4697.21	1.04655	0.187053	5.59496	2.20667e-08	3.1498e-07
441478	NRARP	689.396	2.04093	0.364822	5.59432	2.21492e-08	3.15884e-07
26517	TIMM13	9573.84	0.929162	0.166163	5.59186	2.24652e-08	3.20115e-07
9551	ATP5J2	12846.9	0.894104	0.159922	5.59089	2.25907e-08	3.21625e-07
5567	PRKACB	2544.22	-1.30695	0.233861	-5.58855	2.2897e-08	3.25705e-07
3703	STT3A	10612.8	-0.928551	0.166184	-5.58749	2.30373e-08	3.2742e-07
3029	HAGH	4695.88	1.02552	0.183554	5.587	2.31026e-08	3.28065e-07
23265	EXOC7	5690.87	-1.17741	0.210753	-5.58668	2.31453e-08	3.28389e-07
79002	C19orf43	9038.02	0.938518	0.16801	5.58608	2.32254e-08	3.29119e-07
26022	TMEM98	19787	0.899563	0.161039	5.58599	2.32366e-08	3.29119e-07
392	ARHGAP1	4363.45	-1.02509	0.183562	-5.58441	2.34497e-08	3.31852e-07
51514	DTL	1174.8	-1.56117	0.279605	-5.58351	2.35717e-08	3.33293e-07
412	STS	749.497	-2.20867	0.395656	-5.5823	2.37353e-08	3.35319e-07
54552	GNL3L	1232.73	-2.06973	0.370988	-5.57896	2.41967e-08	3.41545e-07
2977	GUCY1A2	822.287	1.70949	0.30644	5.57854	2.42546e-08	3.4179e-07
11260	XPOT	3872.34	-1.07162	0.192097	-5.57853	2.42554e-08	3.4179e-07
114926	SMIM19	3086.89	1.11091	0.199162	5.57795	2.43368e-08	3.42405e-07
1490	CTGF	67424.7	-0.998523	0.179013	-5.57792	2.43405e-08	3.42405e-07
7508	XPC	2571.43	-1.34176	0.24075	-5.57323	2.5006e-08	3.51467e-07
11163	NUDT4	6785.63	-0.975598	0.175166	-5.56957	2.55365e-08	3.58618e-07
6624	FSCN1	7002.9	-0.974795	0.175041	-5.56894	2.56291e-08	3.59613e-07
92162	TMEM88	145.815	5.06777	0.910159	5.568	2.57674e-08	3.61246e-07
3159	HMGA1	7686.86	0.990463	0.178036	5.56328	2.64755e-08	3.7086e-07
54443	ANLN	957.795	-1.79252	0.322348	-5.5608	2.68539e-08	3.7584e-07
51372	TMA7	17170.7	0.855877	0.153921	5.56051	2.68991e-08	3.76149e-07
114801	TMEM200A	1001.49	-1.57085	0.282509	-5.56036	2.69215e-08	3.76149e-07
8665	EIF3F	14166.7	0.896426	0.161284	5.55807	2.72777e-08	3.80804e-07
9138	ARHGEF1	1480.21	-1.37968	0.2483	-5.5565	2.75232e-08	3.83907e-07
871	SERPINH1	27441.3	-0.891617	0.160473	-5.55619	2.75726e-08	3.84271e-07
6774	STAT3	6391.51	-1.12999	0.203406	-5.55535	2.7705e-08	3.85792e-07
7423	VEGFB	2113.67	1.24901	0.224923	5.55306	2.80712e-08	3.90562e-07
10456	HAX1	7250.04	0.968843	0.174528	5.55122	2.83685e-08	3.94365e-07
1981	EIF4G1	5228.6	-0.990652	0.178497	-5.54998	2.85709e-08	3.96844e-07
55720	TSR1	1920.09	-1.31649	0.237249	-5.54898	2.87347e-08	3.98785e-07
9853	RUSC2	2172.8	-1.20207	0.216637	-5.54875	2.87717e-08	3.98963e-07
9697	TRAM2	5237.18	-1.31535	0.2371	-5.54765	2.89529e-08	4.01139e-07
403	ARL3	7734.26	0.949966	0.171325	5.54483	2.94245e-08	4.06989e-07
26259	FBXW8	1131.06	-1.50398	0.271233	-5.54496	2.94013e-08	4.06989e-07
653275	CFC1B	182.285	4.24143	0.764985	5.54446	2.94856e-08	4.07493e-07
10975	UQCR11	18334.2	0.883668	0.159442	5.54226	2.98599e-08	4.12322e-07
488	ATP2A2	2788.19	1.1865	0.214114	5.54145	2.99975e-08	4.13876e-07
100529209	RNASEK-C17orf49	24503	0.836552	0.150986	5.54058	3.01466e-08	4.15585e-07
84530	SRRM4	711.962	1.99871	0.360928	5.5377	3.06475e-08	4.22138e-07
51690	LSM7	6206.36	0.975384	0.176171	5.53658	3.08434e-08	4.24482e-07
9353	SLIT2	5822.87	1.23261	0.22268	5.53535	3.10605e-08	4.27114e-07
57700	FAM160B1	1526.63	-1.40167	0.253235	-5.53506	3.1112e-08	4.27466e-07
1345	COX6C	23797.5	0.988176	0.178549	5.53449	3.12131e-08	4.285e-07
4363	ABCC1	1381.19	-1.6844	0.304418	-5.5332	3.14449e-08	4.31322e-07
3398	ID2	34530.6	0.883765	0.159769	5.53151	3.17494e-08	4.35138e-07
6201	RPS7	13715.1	0.93536	0.169108	5.53113	3.18176e-08	4.35711e-07
381	ARF5	17979.3	0.843353	0.152499	5.53021	3.19855e-08	4.37647e-07
84313	VPS25	7567.02	0.950518	0.171889	5.52984	3.20518e-08	4.38192e-07
9168	TMSB10	73433	0.798389	0.144415	5.52842	3.2312e-08	4.41384e-07
1634	DCN	4197.55	-1.35483	0.245173	-5.526	3.27622e-08	4.47163e-07
9074	CLDN6	697.703	2.1668	0.392414	5.52173	3.35683e-08	4.5741e-07
115701	ALPK2	576.055	-3.17119	0.574309	-5.52175	3.35637e-08	4.5741e-07
8338	HIST2H2AC	720.797	1.84698	0.334526	5.52118	3.36724e-08	4.58451e-07
5202	PFDN2	5123.21	1.00024	0.18123	5.51919	3.40565e-08	4.63297e-07
771	CA12	331.061	-2.58626	0.468662	-5.51838	3.42148e-08	4.65068e-07
10439	OLFM1	3840.39	1.3618	0.246875	5.51617	3.46469e-08	4.70426e-07
22846	VASH1	2419.19	-1.21775	0.220763	-5.51607	3.46659e-08	4.70426e-07
576	ADGRB2	1195.2	1.77389	0.321927	5.51024	3.58341e-08	4.85879e-07
9079	LDB2	3407.68	1.18635	0.215306	5.51008	3.5868e-08	4.8594e-07
51522	TMEM14C	10725.9	0.884619	0.160626	5.50733	3.64314e-08	4.93167e-07
1191	CLU	4651.31	1.00353	0.182271	5.50569	3.67724e-08	4.97376e-07
3216	HOXB6	439.519	11.4383	2.07767	5.50536	3.68425e-08	4.97916e-07
5218	CDK14	4179.53	-1.01807	0.184996	-5.5032	3.7295e-08	5.03619e-07
51177	PLEKHO1	6978.51	0.92586	0.168321	5.50054	3.78619e-08	5.10858e-07
8028	MLLT10	1090	1.58453	0.288093	5.50005	3.79687e-08	5.1188e-07
167410	LIX1	3281.64	1.15482	0.209992	5.49938	3.81137e-08	5.13415e-07
6636	SNRPF	9518.15	0.951978	0.173119	5.49899	3.81975e-08	5.1403e-07
5209	PFKFB3	1379.71	-1.36341	0.247943	-5.49888	3.82216e-08	5.1403e-07
199	AIF1	553.274	2.15216	0.391506	5.49713	3.86029e-08	5.18737e-07
4697	NDUFA4	40038.8	1.03625	0.188522	5.49673	3.86904e-08	5.1949e-07
285382	C3orf70	630.03	-1.90503	0.346604	-5.49626	3.87931e-08	5.20445e-07
6166	RPL36AL	11145.1	1.1021	0.200524	5.49609	3.88313e-08	5.20534e-07
64097	EPB41L4A	2178.97	1.20988	0.220147	5.49581	3.88916e-08	5.2092e-07
81892	SLIRP	9960.9	0.958694	0.174497	5.49405	3.92815e-08	5.25291e-07
51809	GALNT7	2135.65	-1.46397	0.266462	-5.4941	3.92701e-08	5.25291e-07
1746	DLX2	582.212	-1.88769	0.343842	-5.48999	4.01951e-08	5.37073e-07
64857	PLEKHG2	1250.42	-1.41979	0.258784	-5.48638	4.10248e-08	5.47716e-07
6882	TAF11	3599.98	1.04897	0.191206	5.48606	4.10991e-08	5.48265e-07
2690	GHR	633.85	-2.1059	0.3842	-5.48127	4.22289e-08	5.62882e-07
6240	RRM1	3858.85	-1.10663	0.201925	-5.48041	4.24345e-08	5.65166e-07
9638	FEZ1	9376.57	0.937475	0.171222	5.4752	4.37025e-08	5.81585e-07
100862671	TMEM265	318.109	2.62038	0.478862	5.47211	4.44708e-08	5.91333e-07
57510	XPO5	1483.6	-1.47238	0.269134	-5.47079	4.48026e-08	5.95266e-07
23316	CUX2	308.2	2.78682	0.509513	5.46958	4.51108e-08	5.98878e-07
5104	SERPINA5	166.445	-4.27546	0.78178	-5.46887	4.52903e-08	6.00779e-07
83752	LONP2	2258.45	-1.35232	0.24741	-5.46589	4.60595e-08	6.10491e-07
342865	VSTM2B	179.194	4.2164	0.771478	5.46536	4.61978e-08	6.11343e-07
51188	SS18L2	2680.88	1.18013	0.215926	5.46542	4.6182e-08	6.11343e-07
1271	CNTFR	3998.9	1.18968	0.217697	5.46486	4.63271e-08	6.12564e-07
84063	KIRREL2	537.96	2.09174	0.38281	5.46416	4.65116e-08	6.14206e-07
163859	SDE2	1106.94	-1.57801	0.288796	-5.4641	4.65257e-08	6.14206e-07
85025	TMEM60	2899.08	1.2195	0.223191	5.46391	4.65757e-08	6.14376e-07
79948	PLPPR3	6529.24	1.02576	0.187751	5.4634	4.67102e-08	6.15657e-07
10902	BRD8	3019	-1.11406	0.203994	-5.46122	4.72881e-08	6.22777e-07
2842	GPR19	746.022	1.91477	0.350625	5.46103	4.73393e-08	6.22955e-07
7311	UBA52	11388.2	0.9455	0.173158	5.46034	4.75218e-08	6.24858e-07
6883	TAF12	3818.6	1.06767	0.195543	5.46	4.76128e-08	6.25558e-07
950	SCARB2	7418.59	-0.931666	0.17069	-5.45823	4.80891e-08	6.31313e-07
9583	ENTPD4	3559.82	-1.13297	0.207764	-5.45318	4.94779e-08	6.49029e-07
160418	TMTC3	2822.51	-1.16594	0.21385	-5.45217	4.97598e-08	6.51727e-07
79625	NDNF	440.734	-3.22129	0.590828	-5.45216	4.97625e-08	6.51727e-07
23179	RGL1	3048.77	-1.29436	0.237456	-5.45095	5.01011e-08	6.55641e-07
80790	CMIP	423.239	2.31584	0.424872	5.45067	5.0181e-08	6.56168e-07
9860	LRIG2	600.575	-2.0176	0.37031	-5.4484	5.08249e-08	6.64062e-07
92815	HIST3H2A	322.995	2.5655	0.470999	5.44694	5.12451e-08	6.69021e-07
4673	NAP1L1	21220.9	0.999686	0.183575	5.44565	5.16174e-08	6.7335e-07
431707	LHX8	43.2204	-9.56195	1.75766	-5.44015	5.32352e-08	6.93906e-07
3021	H3F3B	123760	0.876868	0.161206	5.43942	5.34533e-08	6.962e-07
3215	HOXB5	400.532	11.3044	2.07855	5.43862	5.36955e-08	6.98804e-07
2200	FBN1	5807.4	-0.950676	0.174844	-5.43727	5.4104e-08	7.03565e-07
51412	ACTL6B	765.565	1.79956	0.331107	5.43499	5.47994e-08	7.12047e-07
92241	RCSD1	227.411	-3.93658	0.724437	-5.43399	5.51081e-08	7.15496e-07
100532737	ATP6V1G2-DDX39B	1443.22	1.44077	0.265174	5.43329	5.53251e-08	7.17749e-07
4129	MAOB	359.994	-2.46382	0.453554	-5.43225	5.56478e-08	7.21368e-07
93099	DMKN	303.065	2.64314	0.486779	5.42985	5.64007e-08	7.30555e-07
84552	PARD6G	1619.84	-1.28817	0.237312	-5.42818	5.6933e-08	7.36871e-07
283373	ANKRD52	1156.02	-1.69342	0.312027	-5.42715	5.72614e-08	7.40542e-07
65998	C11orf95	1164.93	1.49393	0.275334	5.42586	5.7676e-08	7.4532e-07
1759	DNM1	2189.19	-1.18511	0.218561	-5.42235	5.88216e-08	7.5953e-07
9955	HS3ST3A1	952.696	-2.06228	0.380342	-5.42218	5.8878e-08	7.59664e-07
6635	SNRPE	19926.2	0.927827	0.171139	5.42149	5.91029e-08	7.61971e-07
22880	MORC2	1085.69	-1.52908	0.282082	-5.4207	5.93651e-08	7.64754e-07
645323	LINC00461	277.689	3.69124	0.681165	5.41901	5.99314e-08	7.71447e-07
25953	PNKD	4103.66	1.05988	0.195637	5.41759	6.04061e-08	7.76952e-07
6001	RGS10	579.095	1.92463	0.355289	5.41707	6.05832e-08	7.78018e-07
2647	BLOC1S1	3564.83	1.04248	0.192442	5.41714	6.05603e-08	7.78018e-07
26521	TIMM8B	8508.62	0.913324	0.168657	5.41526	6.11989e-08	7.85314e-07
9097	USP14	4703.58	-1.06371	0.196434	-5.4151	6.12558e-08	7.85434e-07
2618	GART	2446.01	-1.2024	0.222123	-5.41323	6.18972e-08	7.93043e-07
2138	EYA1	2062.02	-1.18448	0.218827	-5.41288	6.20187e-08	7.93984e-07
55791	LRIF1	2219.27	1.29669	0.239623	5.41136	6.25487e-08	8.00149e-07
4921	DDR2	2386.92	-1.35794	0.250996	-5.4102	6.29546e-08	8.04717e-07
142	PARP1	4529.22	-1.23872	0.229008	-5.40909	6.33471e-08	8.09109e-07
6572	SLC18A3	401.905	2.45987	0.45478	5.40893	6.34024e-08	8.09189e-07
1347	COX7A2	25121.9	0.879229	0.162593	5.40754	6.38957e-08	8.14855e-07
5711	PSMD5	1970.79	-1.22311	0.22622	-5.40672	6.41905e-08	8.17983e-07
1937	EEF1G	37309.7	0.797719	0.147575	5.40552	6.46192e-08	8.22812e-07
56146	PCDHA2	209.612	6.19918	1.14728	5.40338	6.53984e-08	8.32091e-07
79582	SPAG16	3045.32	1.07059	0.198297	5.39895	6.7032e-08	8.5222e-07
8848	TSC22D1	17774.8	-0.871718	0.161525	-5.39678	6.78473e-08	8.61922e-07
10267	RAMP1	626.909	1.99103	0.369092	5.39441	6.87491e-08	8.72706e-07
10906	TRAFD1	2600.94	-1.1614	0.215304	-5.39421	6.88241e-08	8.72987e-07
6159	RPL29	25538.5	0.825857	0.15311	5.3939	6.89453e-08	8.73854e-07
9993	DGCR2	5117.11	-1.22064	0.226755	-5.38309	7.32197e-08	9.27318e-07
115024	NT5C3B	9584.33	0.922843	0.171455	5.38241	7.34956e-08	9.301e-07
57125	PLXDC1	1234.33	1.59096	0.295697	5.38038	7.43293e-08	9.39211e-07
64087	MCCC2	1657.84	-1.33041	0.247269	-5.38043	7.43074e-08	9.39211e-07
54892	NCAPG2	1456.78	-1.33159	0.247514	-5.37984	7.4553e-08	9.41317e-07
84255	SLC37A3	3340.36	-1.05174	0.19551	-5.37949	7.46984e-08	9.42433e-07
11147	HHLA3	1976.41	1.21516	0.225921	5.37869	7.50309e-08	9.45905e-07
10059	DNM1L	4876.31	-1.07249	0.199555	-5.3744	7.68363e-08	9.67926e-07
27044	SND1	7215.91	-1.16519	0.216887	-5.37236	7.77118e-08	9.78209e-07
3597	IL13RA1	21148	-0.894002	0.166428	-5.3717	7.79967e-08	9.81048e-07
8992	ATP6V0E1	11768.5	0.856186	0.159425	5.37046	7.85378e-08	9.87101e-07
81615	TMEM163	908.616	1.87563	0.349384	5.36839	7.94438e-08	9.9773e-07
23381	SMG5	3782.29	-1.09164	0.203433	-5.3661	8.04591e-08	1.00971e-06
134492	NUDCD2	4317.95	0.985564	0.18376	5.36333	8.17033e-08	1.02455e-06
65990	FAM173A	1010.92	1.57265	0.29341	5.3599	8.32669e-08	1.04336e-06
6231	RPS26	17979	0.885022	0.165171	5.35823	8.40396e-08	1.05178e-06
8548	BLZF1	1137.26	-1.43591	0.267984	-5.35818	8.40663e-08	1.05178e-06
28956	LAMTOR2	4968.47	0.956085	0.178557	5.35452	8.5785e-08	1.07248e-06
27346	TMEM97	11446.4	0.871514	0.162781	5.35389	8.60819e-08	1.07537e-06
7373	COL14A1	626.637	-1.94493	0.36369	-5.34777	8.9045e-08	1.11155e-06
4935	GPR143	860.245	1.68256	0.314778	5.34522	9.03061e-08	1.12644e-06
57511	COG6	2535.39	-1.23551	0.231153	-5.34497	9.0432e-08	1.12716e-06
80310	PDGFD	1840.9	-1.62542	0.304218	-5.34294	9.14502e-08	1.13899e-06
79772	MCTP1	353.925	2.53678	0.474885	5.34189	9.1982e-08	1.14475e-06
6745	SSR1	10094.1	-0.938937	0.175774	-5.34172	9.20686e-08	1.14496e-06
6184	RPN1	21471.6	-0.840202	0.157298	-5.34146	9.21996e-08	1.14573e-06
2597	GAPDH	82918.6	-0.867044	0.162349	-5.34063	9.26233e-08	1.15013e-06
196294	IMMP1L	2395.83	1.17074	0.219227	5.34031	9.27869e-08	1.1513e-06
7979	SEM1	14405.9	0.920498	0.172403	5.33923	9.33435e-08	1.15733e-06
23767	FLRT3	5368.12	-0.956699	0.179191	-5.33898	9.34686e-08	1.15802e-06
118881	COMTD1	421.474	2.23683	0.419435	5.33297	9.662e-08	1.19616e-06
4717	NDUFC1	9708.49	1.02335	0.191915	5.33229	9.69793e-08	1.19971e-06
129080	EMID1	1553.82	1.5783	0.296034	5.33146	9.74252e-08	1.20358e-06
2768	GNA12	4781.11	-1.1404	0.213901	-5.33144	9.7438e-08	1.20358e-06
6129	RPL7	43357.4	0.902663	0.169379	5.32925	9.86218e-08	1.21729e-06
4041	LRP5	2272.1	-1.62696	0.305497	-5.32561	1.00617e-07	1.241e-06
1728	NQO1	7564.77	-0.904121	0.169793	-5.32484	1.01043e-07	1.24531e-06
3416	IDE	1027.48	-1.85254	0.348007	-5.3233	1.01902e-07	1.25497e-06
81545	FBXO38	1564.42	-1.69379	0.318196	-5.32309	1.02018e-07	1.25546e-06
337876	CHSY3	539.998	-2.75943	0.518951	-5.31732	1.05305e-07	1.29494e-06
145407	C14orf37	3229.33	-1.37399	0.25848	-5.31563	1.06289e-07	1.30607e-06
6382	SDC1	3934.81	-1.03086	0.194004	-5.31362	1.07469e-07	1.31959e-06
1809	DPYSL3	2194.57	1.21819	0.229268	5.3134	1.07599e-07	1.32021e-06
9351	SLC9A3R2	2040.48	1.28489	0.24187	5.31231	1.08247e-07	1.32717e-06
10928	RALBP1	3753.41	1.17853	0.221882	5.31152	1.08713e-07	1.3319e-06
23154	NCDN	1143.5	-1.49771	0.282048	-5.31014	1.09544e-07	1.34108e-06
6949	TCOF1	2434.37	-1.32603	0.249796	-5.30846	1.10557e-07	1.35247e-06
9927	MFN2	4158.42	-1.30833	0.24664	-5.30462	1.12907e-07	1.37985e-06
2180	ACSL1	704.116	-1.78713	0.336907	-5.30453	1.12961e-07	1.37985e-06
55714	TENM3	3318.66	-1.05745	0.199381	-5.30364	1.13515e-07	1.38558e-06
650	BMP2	1125.51	-1.56009	0.294183	-5.30314	1.13827e-07	1.38837e-06
91775	NXPE3	2063.54	-1.20406	0.227069	-5.30264	1.14142e-07	1.39118e-06
9672	SDC3	10430	-1.06286	0.200473	-5.30173	1.1471e-07	1.39708e-06
51258	MRPL51	12223.9	0.945996	0.178467	5.30068	1.1537e-07	1.40407e-06
51227	PIGP	2517.68	1.17271	0.221246	5.30047	1.15503e-07	1.40466e-06
55609	ZNF280C	952.982	-1.54374	0.291273	-5.29998	1.15816e-07	1.40743e-06
3203	HOXA6	145.216	4.5708	0.862879	5.29715	1.17626e-07	1.42838e-06
439921	MXRA7	7131.64	1.01363	0.191524	5.29243	1.20699e-07	1.46462e-06
534	ATP6V1G2	1428.21	1.31922	0.249366	5.29031	1.22109e-07	1.47847e-06
3094	HINT1	27617.9	0.858115	0.1622	5.29048	1.21994e-07	1.47847e-06
3693	ITGB5	5570.11	-1.21112	0.228931	-5.29031	1.22106e-07	1.47847e-06
64121	RRAGC	1770.4	1.26798	0.239774	5.28821	1.23518e-07	1.49443e-06
9716	AQR	1197.8	-1.60706	0.30401	-5.28621	1.24874e-07	1.50974e-06
819	CAMLG	3728.26	1.04924	0.198505	5.2857	1.25226e-07	1.51183e-06
6902	TBCA	10869.1	0.869372	0.164477	5.28569	1.25231e-07	1.51183e-06
10618	TGOLN2	3473.16	-1.15023	0.217687	-5.28385	1.26497e-07	1.52378e-06
137970	UNC5D	597.342	-1.85569	0.351193	-5.28397	1.26417e-07	1.52378e-06
7039	TGFA	324.101	-2.6081	0.493594	-5.2839	1.26465e-07	1.52378e-06
23413	NCS1	2727.66	-1.21462	0.229883	-5.28364	1.26644e-07	1.52443e-06
6599	SMARCC1	6398.14	-0.912044	0.172627	-5.28331	1.26873e-07	1.52608e-06
9742	IFT140	1166.81	-1.46704	0.277816	-5.28063	1.28737e-07	1.54738e-06
100379224	LOC100379224	819.274	1.62178	0.3072	5.27922	1.29737e-07	1.55826e-06
29098	RANGRF	2924.73	1.06029	0.200878	5.27827	1.3041e-07	1.5652e-06
401115	C4orf48	3649.69	1.08745	0.206077	5.27689	1.31391e-07	1.57584e-06
2593	GAMT	3113.31	1.05709	0.200351	5.2762	1.31889e-07	1.58043e-06
5236	PGM1	3010.02	-1.04871	0.198771	-5.27596	1.32061e-07	1.58043e-06
30836	DNTTIP2	2149.01	-1.20482	0.228356	-5.27607	1.31984e-07	1.58043e-06
23136	EPB41L3	2571.35	-1.22179	0.231634	-5.27466	1.33004e-07	1.59056e-06
5916	RARG	3267.72	-1.06778	0.202578	-5.27096	1.3571e-07	1.62175e-06
55450	CAMK2N1	1178.34	1.49209	0.283094	5.27066	1.35935e-07	1.62326e-06
222658	KCTD20	4705.72	-1.18418	0.22473	-5.26937	1.36892e-07	1.63351e-06
100529063	BCL2L2-PABPN1	8841.83	0.872343	0.165597	5.26786	1.38023e-07	1.64582e-06
219927	MRPL21	5359.12	0.933073	0.177194	5.26584	1.39553e-07	1.66285e-06
2314	FLII	3907.73	-1.1623	0.220808	-5.26384	1.41076e-07	1.67979e-06
56899	ANKS1B	466.681	2.16992	0.412271	5.26333	1.41468e-07	1.68325e-06
4122	MAN2A2	2580.79	-1.26937	0.241289	-5.26077	1.43457e-07	1.70568e-06
4223	MEOX2	456.489	-2.65701	0.505577	-5.25541	1.47698e-07	1.75484e-06
91689	SMDT1	3019.67	1.06161	0.202042	5.25439	1.48515e-07	1.76329e-06
54926	UBE2R2	9683.16	0.899946	0.171313	5.25323	1.49454e-07	1.77315e-06
9889	ZBED4	2078.62	-1.26455	0.240758	-5.25236	1.50166e-07	1.78033e-06
84991	RBM17	6422.18	0.914233	0.174098	5.25124	1.5108e-07	1.78987e-06
8744	TNFSF9	1025.64	1.56894	0.29881	5.25062	1.5159e-07	1.79463e-06
9645	MICAL2	164.281	-3.65965	0.697169	-5.24931	1.52669e-07	1.80611e-06
58527	ABRACL	3181.99	1.11703	0.212949	5.24552	1.55846e-07	1.84097e-06
11180	WDR6	6569.82	-0.954012	0.181875	-5.24542	1.55925e-07	1.84097e-06
6696	SPP1	1208.49	-1.41646	0.270039	-5.24539	1.5595e-07	1.84097e-06
79077	DCTPP1	3378.73	1.01602	0.193711	5.24506	1.56233e-07	1.84299e-06
16	AARS	3528.37	-1.17509	0.224137	-5.24273	1.58218e-07	1.86508e-06
2022	ENG	8852.59	-1.06858	0.203883	-5.24113	1.596e-07	1.88003e-06
100506233	RAB30-AS1	1025.33	1.50719	0.287583	5.24087	1.59821e-07	1.88129e-06
5142	PDE4B	941.894	-1.48861	0.284079	-5.24011	1.60481e-07	1.88771e-06
79001	VKORC1	8059.8	0.905359	0.17284	5.23814	1.62203e-07	1.90661e-06
3800	KIF5C	5601.74	0.994276	0.189823	5.2379	1.62413e-07	1.90772e-06
23644	EDC4	1971.62	-1.60955	0.307342	-5.23698	1.63221e-07	1.91585e-06
3190	HNRNPK	34813.4	-0.991058	0.18935	-5.23399	1.65893e-07	1.94582e-06
8270	LAGE3	2277.66	1.13483	0.216878	5.23257	1.67167e-07	1.95938e-06
29937	NENF	2393.78	1.15785	0.221287	5.23238	1.67344e-07	1.96007e-06
23132	RAD54L2	2096.84	-1.23437	0.23616	-5.22684	1.72428e-07	2.01818e-06
101180901	IPO11-LRRC70	163.309	3.72415	0.713073	5.22268	1.76347e-07	2.06259e-06
10485	C1orf61	130.169	6.56046	1.2564	5.22162	1.7736e-07	2.07297e-06
5281	PIGF	4962.98	0.931282	0.178434	5.21918	1.79716e-07	2.09754e-06
23359	FAM189A1	158.443	-3.32538	0.637144	-5.21921	1.79691e-07	2.09754e-06
7259	TSPYL1	2574.2	-1.1018	0.211135	-5.21846	1.80413e-07	2.10418e-06
7775	ZNF232	1986.89	1.23713	0.23711	5.21752	1.81333e-07	2.11342e-06
7913	DEK	9396.38	0.870923	0.167006	5.21492	1.83893e-07	2.14174e-06
84450	ZNF512	2199.3	-1.22595	0.235196	-5.21247	1.86342e-07	2.16873e-06
7403	KDM6A	737.137	-1.65627	0.317937	-5.20942	1.89427e-07	2.20309e-06
51506	UFC1	7378.91	0.876544	0.168272	5.2091	1.89758e-07	2.20427e-06
8897	MTMR3	1471.71	-1.38811	0.266479	-5.20906	1.89796e-07	2.20427e-06
7922	SLC39A7	9304.96	-1.28483	0.246699	-5.20808	1.90804e-07	2.21442e-06
6125	RPL5	42874.1	0.839652	0.161338	5.2043	1.94726e-07	2.25836e-06
11252	PACSIN2	2290.48	-1.10074	0.211563	-5.2029	1.96202e-07	2.27228e-06
730101	LOC730101	237.261	-3.06975	0.589996	-5.203	1.96101e-07	2.27228e-06
100507254	LINC01013	409.11	-2.09888	0.403592	-5.2005	1.98752e-07	2.30021e-06
5660	PSAP	50826.1	-0.772972	0.148694	-5.19842	2.00991e-07	2.32448e-06
57222	ERGIC1	3461.44	-1.45103	0.279306	-5.19513	2.04576e-07	2.3643e-06
91461	PKDCC	2986.22	-1.15316	0.222019	-5.19396	2.05868e-07	2.37756e-06
6923	ELOB	19250.8	0.895621	0.172546	5.19062	2.09595e-07	2.41891e-06
54958	TMEM160	2152.12	1.15059	0.221691	5.19006	2.10224e-07	2.42447e-06
140801	RPL10L	214.937	7.96191	1.53435	5.18909	2.11323e-07	2.43544e-06
814	CAMK4	180.78	-3.13269	0.603788	-5.18839	2.12115e-07	2.44288e-06
65003	MRPL11	4087.12	0.969786	0.18693	5.18798	2.12592e-07	2.44666e-06
54550	NECAB2	4684.83	1.24329	0.239693	5.187	2.13707e-07	2.45778e-06
55062	WIPI1	7816.29	-0.912067	0.175848	-5.18667	2.14092e-07	2.46049e-06
9815	GIT2	1732.57	-1.26173	0.243278	-5.18638	2.14419e-07	2.46254e-06
440173	LOC440173	354.519	2.3261	0.448591	5.18534	2.15618e-07	2.47459e-06
83742	MARVELD1	6329.93	-0.982299	0.189447	-5.18508	2.1592e-07	2.47633e-06
653192	TRIM43B	38.7416	-9.40412	1.81382	-5.18472	2.16344e-07	2.47947e-06
29889	GNL2	3038.41	-1.20081	0.231672	-5.18323	2.18079e-07	2.49762e-06
146330	FBXL16	240.133	3.29986	0.636827	5.18173	2.19842e-07	2.51433e-06
7078	TIMP3	11428	-0.845462	0.163162	-5.18173	2.19842e-07	2.51433e-06
1933	EEF1B2	15375.7	0.810395	0.156406	5.18135	2.20281e-07	2.51736e-06
4907	NT5E	856.002	-1.85976	0.35894	-5.18124	2.20412e-07	2.51736e-06
100128731	OST4	30299.1	0.90431	0.174575	5.18007	2.21807e-07	2.53154e-06
402	ARL2	5443.02	0.913505	0.176475	5.17639	2.26225e-07	2.58019e-06
81566	CSRNP2	2366.2	-1.24632	0.240795	-5.17584	2.26888e-07	2.58596e-06
10489	LRRC41	9136.46	-0.930413	0.179767	-5.17565	2.27121e-07	2.58683e-06
6448	SGSH	1930.67	-1.1977	0.231429	-5.17523	2.2763e-07	2.59084e-06
10642	IGF2BP1	2759.91	-1.0965	0.211905	-5.17446	2.28571e-07	2.59975e-06
7534	YWHAZ	48199.9	-0.886917	0.171515	-5.17109	2.3273e-07	2.64524e-06
401466	C8orf59	4921.13	0.999104	0.193223	5.17072	2.33194e-07	2.64869e-06
6480	ST6GAL1	1791.5	-1.32077	0.255528	-5.1688	2.35598e-07	2.67232e-06
23279	NUP160	1765.9	-1.32836	0.256991	-5.16889	2.35494e-07	2.67232e-06
646113	LINC00643	293.683	2.69799	0.52208	5.16778	2.36897e-07	2.68212e-06
55627	SMPD4	3595.96	-0.989606	0.191497	-5.16773	2.36949e-07	2.68212e-06
79646	PANK3	2401.53	-1.16684	0.22579	-5.1678	2.36865e-07	2.68212e-06
4343	MOV10	1505.77	-1.50402	0.29123	-5.16438	2.41234e-07	2.72875e-06
579	NKX3-2	110.188	-4.64918	0.90061	-5.16225	2.43998e-07	2.75813e-06
6124	RPL4	27699.9	0.853213	0.16535	5.16003	2.46907e-07	2.7872e-06
4256	MGP	2501.41	-4.90066	0.949718	-5.16012	2.46798e-07	2.7872e-06
55837	EAPP	5905.5	1.07455	0.208267	5.15946	2.47657e-07	2.79375e-06
9843	HEPH	6346.72	-0.89267	0.173027	-5.15914	2.48092e-07	2.79675e-06
26167	PCDHB5	211.854	7.94102	1.53929	5.15889	2.48425e-07	2.79859e-06
192286	HIGD2A	4955.73	0.972214	0.188466	5.15857	2.48849e-07	2.80146e-06
6193	RPS5	16437.1	0.795088	0.154255	5.15437	2.5448e-07	2.8629e-06
114798	SLITRK1	390.163	-2.35924	0.458155	-5.14944	2.6126e-07	2.93718e-06
84265	POLR3GL	2764.27	1.08756	0.211265	5.14783	2.63512e-07	2.96048e-06
2903	GRIN2A	283.195	2.75537	0.535317	5.14716	2.64454e-07	2.96904e-06
3084	NRG1	331.135	2.36471	0.459452	5.1468	2.64968e-07	2.97279e-06
8660	IRS2	1096.17	1.41663	0.275271	5.14632	2.65646e-07	2.97837e-06
4804	NGFR	3444.65	1.06356	0.206729	5.14469	2.67959e-07	3.00227e-06
9373	PLAA	2563.65	-1.11568	0.216909	-5.14353	2.69626e-07	3.0189e-06
5768	QSOX1	1675.55	-1.30362	0.253592	-5.14061	2.73842e-07	3.06402e-06
23545	ATP6V0A2	977.148	-1.88117	0.365983	-5.14004	2.74674e-07	3.07126e-06
1503	CTPS1	2357	-1.15713	0.225226	-5.13763	2.78231e-07	3.10892e-06
127703	C1orf216	1422.05	-1.46062	0.284336	-5.13694	2.79253e-07	3.11823e-06
152404	IGSF11	189.723	3.38631	0.659284	5.13634	2.8014e-07	3.12602e-06
25802	LMOD1	414.705	2.27668	0.443263	5.13617	2.80391e-07	3.12671e-06
4130	MAP1A	2947.81	-1.19324	0.232347	-5.13561	2.81223e-07	3.13388e-06
429	ASCL1	169.437	3.58097	0.697373	5.13494	2.82237e-07	3.14305e-06
64928	MRPL14	7461	0.908327	0.177223	5.12532	2.9703e-07	3.30404e-06
29097	CNIH4	8575.74	0.863147	0.16841	5.12528	2.97094e-07	3.30404e-06
55681	SCYL2	2119.13	-1.19391	0.232964	-5.12488	2.97732e-07	3.30892e-06
3309	HSPA5	60815	-1.0361	0.202203	-5.12407	2.99008e-07	3.31889e-06
23382	AHCYL2	1262.48	-1.37828	0.268983	-5.12406	2.99032e-07	3.31889e-06
547	KIF1A	2971.72	1.19239	0.23273	5.12348	2.99951e-07	3.32686e-06
9695	EDEM1	783.169	-1.5815	0.308912	-5.1196	3.06189e-07	3.39376e-06
10476	ATP5H	9637.48	0.899243	0.175676	5.11875	3.07566e-07	3.40674e-06
54985	HCFC1R1	3433.12	1.04049	0.203371	5.1162	3.1175e-07	3.45077e-06
51647	FAM96B	5884.15	0.894093	0.17485	5.11349	3.16268e-07	3.49844e-06
10899	JTB	7531.95	0.897771	0.175608	5.11236	3.18153e-07	3.51458e-06
8237	USP11	23631.1	-0.792062	0.154928	-5.11244	3.18021e-07	3.51458e-06
1936	EEF1D	9200.99	0.829032	0.162276	5.10879	3.24223e-07	3.57924e-06
2596	GAP43	6975.59	1.0448	0.204523	5.10847	3.24778e-07	3.58297e-06
1974	EIF4A2	12315.8	0.902371	0.176765	5.10493	3.30912e-07	3.64821e-06
1508	CTSB	16084.2	-0.800602	0.156845	-5.10443	3.31801e-07	3.65556e-06
7812	CSDE1	17968.8	-0.859968	0.168515	-5.1032	3.33958e-07	3.67688e-06
55239	OGFOD1	2998.13	-1.00461	0.196889	-5.10241	3.3536e-07	3.68985e-06
26002	MOXD1	1014.76	-1.4068	0.275845	-5.09998	3.39682e-07	3.73492e-06
55200	PLEKHG6	256.611	2.71466	0.53239	5.09901	3.41438e-07	3.75141e-06
4300	MLLT3	1176.54	1.51363	0.296855	5.0989	3.41636e-07	3.75141e-06
8467	SMARCA5	7037.56	-0.887211	0.174038	-5.09779	3.43639e-07	3.77089e-06
79747	ADGB	162.204	-4.2681	0.837435	-5.09664	3.45736e-07	3.79139e-06
4009	LMX1A	469.118	2.53309	0.497127	5.09547	3.47885e-07	3.81242e-06
90411	MCFD2	7286.91	-1.00176	0.196617	-5.09495	3.48826e-07	3.8202e-06
9918	NCAPD2	3150.59	-1.3934	0.273549	-5.0938	3.50958e-07	3.841e-06
10430	TMEM147	11267.1	0.861693	0.169189	5.09308	3.523e-07	3.85314e-06
401152	C4orf3	14267.7	0.80624	0.158321	5.09245	3.53468e-07	3.86336e-06
5997	RGS2	1063.69	-1.73709	0.341155	-5.09179	3.54697e-07	3.87422e-06
10284	SAP18	19937.1	0.866549	0.170229	5.0905	3.57123e-07	3.89814e-06
23032	USP33	3871.04	-1.13215	0.222477	-5.08882	3.60307e-07	3.92974e-06
2580	GAK	1841.58	-1.43277	0.281557	-5.08872	3.60494e-07	3.92974e-06
4311	MME	2501.18	1.52973	0.300893	5.08397	3.69622e-07	4.02659e-06
51816	ADA2	351.705	2.30983	0.454367	5.08362	3.70303e-07	4.03135e-06
6491	STIL	689.725	-1.66149	0.326867	-5.08309	3.71346e-07	4.04004e-06
25798	BRI3	1105.65	1.38165	0.271881	5.0818	3.73884e-07	4.06497e-06
100379345	MIR181A2HG	843.231	1.67357	0.32938	5.08096	3.75525e-07	4.08013e-06
90390	MED30	1587.04	1.24636	0.245406	5.0788	3.79834e-07	4.12424e-06
57122	NUP107	2120.84	-1.12254	0.2211	-5.07708	3.83277e-07	4.15888e-06
5902	RANBP1	13014.8	0.855089	0.168427	5.0769	3.83635e-07	4.16003e-06
55683	KANSL3	2504.89	-1.07101	0.210969	-5.07663	3.84197e-07	4.1634e-06
6133	RPL9	27483.6	0.855039	0.168498	5.07449	3.88541e-07	4.2077e-06
10682	EBP	6480.65	0.901785	0.177797	5.07199	3.93675e-07	4.26051e-06
23603	CORO1C	6689.68	-0.939926	0.185345	-5.07122	3.95281e-07	4.27509e-06
8672	EIF4G3	4047.07	-0.968928	0.191084	-5.07069	3.96382e-07	4.28419e-06
60528	ELAC2	2657.02	-1.05415	0.207909	-5.07026	3.97262e-07	4.2909e-06
11346	SYNPO	1807.48	1.24438	0.245485	5.06908	3.99749e-07	4.31494e-06
389677	RBM12B	735.461	-1.64925	0.325375	-5.06877	4.00391e-07	4.31904e-06
10309	CCNO	173.947	3.63191	0.717343	5.06301	4.12698e-07	4.44889e-06
6344	SCTR	220.858	7.76961	1.53466	5.06277	4.13213e-07	4.45154e-06
56126	PCDHB10	554.09	-2.06331	0.407704	-5.0608	4.17503e-07	4.49482e-06
3060	HCRT	124.572	4.83806	0.956307	5.0591	4.21232e-07	4.53202e-06
246184	CDC26	3551.35	0.97623	0.193008	5.05797	4.23738e-07	4.55601e-06
128338	DRAM2	2173.08	1.10362	0.218204	5.05775	4.2424e-07	4.55665e-06
4061	LY6E	3815.54	0.959439	0.189699	5.0577	4.24349e-07	4.55665e-06
6617	SNAPC1	2904.7	1.11622	0.220722	5.05712	4.25635e-07	4.56749e-06
11046	SLC35D2	1778.83	1.28194	0.253538	5.05621	4.27662e-07	4.58626e-06
84662	GLIS2	456.155	1.99072	0.393855	5.05444	4.31662e-07	4.62615e-06
148014	TTC9B	395.918	2.47559	0.489845	5.05382	4.33053e-07	4.63504e-06
100996712	SRGAP2D	277.166	-2.40126	0.475126	-5.05394	4.32779e-07	4.63504e-06
605	BCL7A	1882.48	1.28668	0.25461	5.05353	4.33708e-07	4.63904e-06
55958	KLHL9	3518.08	-1.04367	0.206609	-5.0514	4.3858e-07	4.68813e-06
23022	PALLD	6935.8	-0.864072	0.171086	-5.0505	4.40644e-07	4.70714e-06
5743	PTGS2	190.202	-2.87379	0.569374	-5.04728	4.48136e-07	4.78408e-06
4548	MTR	1857.84	-1.36929	0.271629	-5.04102	4.63059e-07	4.94019e-06
219348	PLAC9	536.56	1.85251	0.367718	5.03784	4.70806e-07	5.0196e-06
54928	IMPAD1	5964.05	-0.90504	0.179824	-5.03291	4.83081e-07	5.14715e-06
9516	LITAF	13751.5	0.806756	0.160339	5.03156	4.86513e-07	5.18038e-06
2109	ETFB	4898.51	1.00192	0.199175	5.03035	4.89582e-07	5.2097e-06
6881	TAF10	4019.96	0.939624	0.186832	5.02924	4.92428e-07	5.23369e-06
5754	PTK7	5782.8	-0.918731	0.182681	-5.02915	4.92661e-07	5.23369e-06
6285	S100B	966.088	-1.622	0.322523	-5.0291	4.92787e-07	5.23369e-06
54431	DNAJC10	8801.87	-0.895104	0.178002	-5.02862	4.94013e-07	5.24333e-06
333	APLP1	19064.4	0.797824	0.158712	5.02685	4.98596e-07	5.28179e-06
6175	RPLP0	33460.9	0.745533	0.148305	5.02704	4.98115e-07	5.28179e-06
23231	SEL1L3	1051.61	-1.61814	0.321894	-5.02694	4.9837e-07	5.28179e-06
8673	VAMP8	524.424	2.23281	0.444225	5.02631	4.99999e-07	5.29326e-06
286411	LINC00632	423.697	-2.28991	0.455995	-5.02178	5.11944e-07	5.41624e-06
114907	FBXO32	1463.86	1.58977	0.316602	5.02136	5.13061e-07	5.42458e-06
113622	ADPRHL1	448.546	2.1818	0.434514	5.02123	5.13404e-07	5.42474e-06
79192	IRX1	1692.22	1.19595	0.238201	5.02074	5.14725e-07	5.43522e-06
90488	TMEM263	7458.7	-0.889408	0.177264	-5.01743	5.23673e-07	5.52617e-06
2821	GPI	5215.99	-0.913214	0.182062	-5.01595	5.2773e-07	5.56543e-06
653784	MZT2A	4177.72	0.925016	0.184516	5.01321	5.35304e-07	5.6417e-06
23246	BOP1	2747.84	-1.07425	0.214298	-5.01289	5.36197e-07	5.6475e-06
80781	COL18A1	9613.42	0.86242	0.17206	5.01233	5.37741e-07	5.65891e-06
83892	KCTD10	3978.69	-0.967319	0.192991	-5.01225	5.37965e-07	5.65891e-06
84823	LMNB2	3942.25	-1.20363	0.240232	-5.01028	5.43511e-07	5.71361e-06
1476	CSTB	8045.55	0.863508	0.1724	5.00876	5.47814e-07	5.75518e-06
4134	MAP4	7476.4	-0.900838	0.179895	-5.00758	5.5119e-07	5.7833e-06
7157	TP53	1807.29	-1.18681	0.237001	-5.00761	5.51108e-07	5.7833e-06
4053	LTBP2	488.756	-1.87874	0.375209	-5.00718	5.52329e-07	5.79156e-06
4141	MARS	6705.34	-1.14113	0.228029	-5.00432	5.6059e-07	5.87073e-06
63027	SLC22A23	1611.37	-1.3444	0.268643	-5.0044	5.60368e-07	5.87073e-06
197021	LCTL	390.071	-2.62366	0.524769	-4.99965	5.7435e-07	6.01102e-06
1408	CRY2	686.858	-1.62561	0.325513	-4.99399	5.91458e-07	6.18615e-06
51065	RPS27L	19035	0.801203	0.160441	4.99377	5.92134e-07	6.1893e-06
10269	ZMPSTE24	2975.04	-1.10148	0.220641	-4.9922	5.96955e-07	6.23574e-06
6181	RPLP2	11195.6	0.914895	0.183352	4.98982	6.0435e-07	6.30901e-06
2876	GPX1	11050.5	0.809338	0.162317	4.98615	6.15928e-07	6.42581e-06
10120	ACTR1B	1405.52	1.314	0.26363	4.98426	6.22007e-07	6.48513e-06
57480	PLEKHG1	679.507	-1.7652	0.354208	-4.98351	6.24417e-07	6.50615e-06
388394	RPRML	146.287	4.05802	0.814417	4.98273	6.26946e-07	6.52839e-06
805	CALM2	108648	0.881302	0.176913	4.98156	6.30741e-07	6.56141e-06
64151	NCAPG	1646.1	-1.25359	0.251649	-4.98151	6.30913e-07	6.56141e-06
9641	IKBKE	912.259	-2.07975	0.417636	-4.97982	6.36436e-07	6.61469e-06
22894	DIS3	2435.24	-1.04839	0.210537	-4.97958	6.37233e-07	6.61881e-06
2009	EML1	3416.63	-1.09034	0.218975	-4.97927	6.38241e-07	6.62511e-06
30833	NT5C	2193.77	1.08644	0.218223	4.97858	6.40516e-07	6.64454e-06
7316	UBC	73701.8	-1.08623	0.218213	-4.97783	6.43018e-07	6.66632e-06
23167	EFR3A	1626.61	-1.23496	0.24813	-4.97706	6.45577e-07	6.68864e-06
5147	PDE6D	3031.77	0.987023	0.198336	4.97652	6.47383e-07	6.69895e-06
920	CD4	678.384	-1.6008	0.321667	-4.97657	6.47202e-07	6.69895e-06
6207	RPS13	18185.6	0.924612	0.185869	4.97453	6.54054e-07	6.76374e-06
7414	VCL	13134.8	-0.805772	0.162005	-4.97375	6.56703e-07	6.78689e-06
51759	C9orf78	6019.28	0.881677	0.177287	4.97315	6.58739e-07	6.80368e-06
25796	PGLS	4327.42	0.945408	0.190114	4.97286	6.59726e-07	6.80535e-06
25824	PRDX5	22460.8	0.759672	0.152763	4.97287	6.59694e-07	6.80535e-06
9787	DLGAP5	1977.49	-1.41458	0.28454	-4.97147	6.64471e-07	6.85002e-06
23332	CLASP1	1662	-1.18374	0.238126	-4.97105	6.65917e-07	6.86064e-06
54545	MTMR12	1230.95	-1.33951	0.269493	-4.97048	6.6786e-07	6.87638e-06
9482	STX8	2676.29	1.05243	0.211804	4.96889	6.73381e-07	6.92891e-06
6161	RPL32	16827.8	0.840571	0.169185	4.96836	6.75209e-07	6.94338e-06
432	ASGR1	528.809	1.85864	0.374108	4.96819	6.75814e-07	6.94528e-06
2295	FOXF2	376.795	-2.40919	0.484934	-4.96807	6.76236e-07	6.9453e-06
1979	EIF4EBP2	6600.31	-0.925428	0.186292	-4.96761	6.77846e-07	6.9575e-06
9060	PAPSS2	1302.52	-1.27189	0.25611	-4.96616	6.8292e-07	7.00523e-06
11188	NISCH	3160.9	-0.964982	0.194324	-4.96585	6.84025e-07	7.01222e-06
285761	DCBLD1	606.524	-1.74759	0.352092	-4.96344	6.92537e-07	7.09507e-06
29997	NOP53	2921.33	1.03947	0.209476	4.96223	6.96892e-07	7.13442e-06
84833	USMG5	15273.4	0.844616	0.170212	4.96213	6.97242e-07	7.13442e-06
51014	TMED7	5782.54	-0.889366	0.179277	-4.96086	7.01825e-07	7.17686e-06
11060	WWP2	1832.8	-1.11775	0.225456	-4.95772	7.1327e-07	7.28939e-06
51035	UBXN1	4875.27	0.891604	0.180012	4.95303	7.3068e-07	7.4627e-06
2624	GATA2	583.77	-1.79143	0.361854	-4.95068	7.39553e-07	7.54865e-06
5300	PIN1	7247.84	0.880213	0.177829	4.94977	7.43021e-07	7.57936e-06
1047	CLGN	1435.57	1.25153	0.253006	4.94662	7.55124e-07	7.69807e-06
4298	MLLT1	1412.53	1.26649	0.256038	4.94648	7.55661e-07	7.69879e-06
1460	CSNK2B	13526.3	0.834671	0.168969	4.93979	7.82075e-07	7.96299e-06
9643	MORF4L2	39219.3	-1.05962	0.214532	-4.93922	7.84371e-07	7.98145e-06
9026	HIP1R	1232.16	-1.31674	0.266759	-4.93608	7.97074e-07	8.10571e-06
6921	ELOC	8383.09	0.828958	0.167948	4.93582	7.98166e-07	8.11182e-06
3482	IGF2R	2553.44	-1.22519	0.24842	-4.93194	8.14166e-07	8.26934e-06
345079	SOWAHB	190.91	-2.90464	0.588959	-4.93181	8.14709e-07	8.26977e-06
64579	NDST4	932.614	-1.72169	0.349158	-4.93098	8.1817e-07	8.29981e-06
55379	LRRC59	4235.75	-0.927944	0.188278	-4.92859	8.28248e-07	8.39688e-06
9873	FCHSD2	1505.82	-1.29039	0.261848	-4.928	8.30776e-07	8.41734e-06
23593	HEBP2	4610.24	0.894951	0.181619	4.92763	8.32315e-07	8.42387e-06
2803	GOLGA4	3625.44	-0.939867	0.190735	-4.9276	8.32441e-07	8.42387e-06
375346	TMEM110	1404.31	-1.33115	0.270158	-4.92732	8.3364e-07	8.43084e-06
5257	PHKB	3739.56	-0.929354	0.188684	-4.92546	8.41617e-07	8.5063e-06
2950	GSTP1	56427.1	0.818045	0.166259	4.92031	8.64063e-07	8.72783e-06
1725	DHPS	4464.25	0.975332	0.198269	4.91923	8.68873e-07	8.77105e-06
26986	PABPC1	15318	0.814423	0.165596	4.91812	8.73812e-07	8.81552e-06
10869	USP19	1589.2	-1.2495	0.254072	-4.91789	8.74835e-07	8.82045e-06
126003	TRAPPC5	5810.35	0.886267	0.180244	4.91703	8.78663e-07	8.84843e-06
1299	COL9A3	5606.29	-0.867507	0.176429	-4.91703	8.78682e-07	8.84843e-06
203	AK1	4844.89	0.971427	0.1976	4.91612	8.82754e-07	8.87321e-06
1399	CRKL	3701.69	-1.00113	0.203637	-4.91627	8.82089e-07	8.87321e-06
55215	FANCI	1891.62	-1.15539	0.235018	-4.91615	8.82612e-07	8.87321e-06
22903	BTBD3	3195.05	-1.11452	0.226798	-4.91414	8.91711e-07	8.95779e-06
57617	VPS18	1487.66	-1.50378	0.30606	-4.91334	8.95369e-07	8.98907e-06
84314	TMEM107	1447.21	1.32454	0.269645	4.91217	9.0076e-07	9.0377e-06
10483	SEC23B	2611.95	-1.04878	0.213513	-4.91202	9.01415e-07	9.03878e-06
55521	TRIM36	758.876	1.6167	0.329461	4.90711	9.24269e-07	9.26232e-06
55240	STEAP3	428.034	-1.97278	0.402047	-4.90684	9.2556e-07	9.26963e-06
4946	OAZ1	18901.6	0.772659	0.157482	4.90634	9.27898e-07	9.28741e-06
3073	HEXA	4162.13	-1.02766	0.209491	-4.90551	9.31842e-07	9.32124e-06
10950	BTG3	3042.46	1.01831	0.207808	4.90027	9.57033e-07	9.56743e-06
4358	MPV17	6306.02	0.931754	0.190191	4.89903	9.63092e-07	9.62218e-06
6143	RPL19	25664.9	0.823649	0.168236	4.89579	9.79134e-07	9.77655e-06
55129	ANO10	1310.09	-1.23371	0.252026	-4.89517	9.82228e-07	9.80151e-06
374882	TMEM205	4483.28	1.09496	0.223774	4.89316	9.92311e-07	9.89507e-06
2581	GALC	2756.32	-0.988501	0.202021	-4.89306	9.92802e-07	9.89507e-06
83894	TTC29	203.191	2.91078	0.59497	4.89231	9.96575e-07	9.92668e-06
51449	PCYOX1	7442.28	-0.852189	0.17424	-4.89089	1.00382e-06	9.99287e-06
9416	DDX23	1959.49	-1.09255	0.223398	-4.89062	1.0052e-06	1.00005e-05
26020	LRP10	5801.62	-0.949598	0.194183	-4.89022	1.00723e-06	1.00087e-05
23396	PIP5K1C	2711.46	-1.01926	0.208427	-4.89023	1.00719e-06	1.00087e-05
91039	DPP9	957.806	-1.46585	0.299815	-4.88919	1.01254e-06	1.00553e-05
91409	CCDC74B	511.645	2.23633	0.457548	4.88763	1.02059e-06	1.01232e-05
8974	P4HA2	3803.87	-0.921687	0.188576	-4.88763	1.02058e-06	1.01232e-05
27250	PDCD4	3597.8	-0.972746	0.199228	-4.88257	1.0471e-06	1.03798e-05
84513	PLPP5	3350.22	1.04833	0.214731	4.88206	1.04981e-06	1.04005e-05
2946	GSTM2	3178.35	0.971922	0.199224	4.87854	1.06875e-06	1.05818e-05
558	AXL	6750.34	0.884827	0.181376	4.87842	1.06941e-06	1.05819e-05
1038	CDR1	4614.78	1.21758	0.249609	4.87797	1.07183e-06	1.05995e-05
6464	SHC1	9319.42	-0.802878	0.164619	-4.87718	1.07613e-06	1.06322e-05
83606	GUCD1	3097.18	-1.1789	0.24172	-4.87713	1.07641e-06	1.06322e-05
8503	PIK3R3	3749.2	-0.969422	0.198785	-4.87674	1.07855e-06	1.06469e-05
79632	FAM184A	352.946	2.82945	0.58056	4.87365	1.09553e-06	1.08081e-05
162394	SLFN5	828.077	-1.4701	0.301762	-4.8717	1.10641e-06	1.09089e-05
51684	SUFU	1158.54	-1.27803	0.262411	-4.87034	1.11409e-06	1.0978e-05
63891	RNF123	1786.75	-1.20786	0.24815	-4.86745	1.1305e-06	1.11331e-05
51194	IPO11	853.863	-1.76246	0.362112	-4.86718	1.13205e-06	1.11417e-05
7507	XPA	1928.21	1.21585	0.249912	4.86512	1.14385e-06	1.12511e-05
100506963	ELOA-AS1	345.6	2.50047	0.514018	4.86455	1.14719e-06	1.12639e-05
8510	MMP23B	602.612	2.03879	0.419095	4.86476	1.14598e-06	1.12639e-05
56252	YLPM1	3111.57	1.20598	0.24791	4.86456	1.14711e-06	1.12639e-05
727866	FAM156B	653.035	-1.69983	0.349541	-4.86304	1.15595e-06	1.13432e-05
79188	TMEM43	5352.34	-0.988191	0.203278	-4.86129	1.16622e-06	1.14372e-05
57003	CCDC47	4056.46	-0.895759	0.184335	-4.8594	1.17744e-06	1.15404e-05
9110	MTMR4	2336.12	-1.05977	0.218094	-4.85924	1.17838e-06	1.15427e-05
80319	CXXC4	1370.02	1.26126	0.259608	4.85832	1.18389e-06	1.15897e-05
1454	CSNK1E	9571.23	0.925849	0.190606	4.8574	1.18939e-06	1.16368e-05
12	SERPINA3	2811.81	-8.85226	1.82402	-4.85316	1.21507e-06	1.18809e-05
3920	LAMP2	10667	-0.908812	0.187284	-4.85259	1.2186e-06	1.19084e-05
10063	COX17	2483.08	1.06092	0.218692	4.85121	1.22711e-06	1.19845e-05
26155	NOC2L	2775.51	-1.00503	0.207203	-4.85043	1.23196e-06	1.20247e-05
3157	HMGCS1	8143.82	-1.05276	0.217106	-4.84907	1.24044e-06	1.21003e-05
358	AQP1	269.298	-2.50901	0.517655	-4.84688	1.25419e-06	1.22273e-05
55967	NDUFA12	8205.5	0.957771	0.197696	4.84466	1.26825e-06	1.23571e-05
6188	RPS3	32425.4	0.746586	0.154114	4.84438	1.27008e-06	1.23675e-05
6904	TBCD	2440.26	-1.16143	0.239758	-4.84417	1.27143e-06	1.23734e-05
8788	DLK1	1200.77	-1.48155	0.305855	-4.84395	1.27284e-06	1.23799e-05
7586	ZKSCAN1	5623.13	-0.869825	0.179595	-4.84326	1.27729e-06	1.24158e-05
122961	ISCA2	4502.99	0.895909	0.185081	4.84063	1.29428e-06	1.25736e-05
5734	PTGER4	207.145	-3.08146	0.636649	-4.84012	1.29759e-06	1.25983e-05
27345	KCNMB4	2223.91	1.14345	0.236297	4.83905	1.30464e-06	1.26444e-05
4430	MYO1B	2963	-0.979417	0.202395	-4.83914	1.30403e-06	1.26444e-05
65264	UBE2Z	4257.12	-0.985864	0.203724	-4.8392	1.3036e-06	1.26444e-05
6793	STK10	949.172	-1.38095	0.285392	-4.83877	1.30646e-06	1.26546e-05
4887	NPY2R	148.476	5.39258	1.11469	4.83775	1.31316e-06	1.27121e-05
11224	RPL35	18407.7	0.74844	0.154728	4.83713	1.31728e-06	1.27445e-05
23357	ANGEL1	1220.38	-1.42159	0.293957	-4.83604	1.32449e-06	1.28068e-05
80700	UBXN6	1062.23	1.3501	0.279184	4.83587	1.32563e-06	1.28103e-05
60529	ALX4	460.133	-1.91882	0.396813	-4.83557	1.32767e-06	1.28187e-05
8516	ITGA8	1853.68	-4.51141	0.932974	-4.83551	1.32805e-06	1.28187e-05
29015	SLC43A3	593.427	-1.76892	0.365835	-4.8353	1.32946e-06	1.28247e-05
399979	SNX19	2215.07	-1.1413	0.236107	-4.83381	1.33943e-06	1.29135e-05
57162	PELI1	4089.37	-0.930411	0.192571	-4.83153	1.3549e-06	1.3055e-05
64968	MRPS6	15600	0.813218	0.168365	4.83009	1.36471e-06	1.31418e-05
64975	MRPL41	2518.61	1.02674	0.212595	4.82955	1.36839e-06	1.31696e-05
22890	ZBTB1	2412.79	-1.15453	0.23912	-4.82825	1.37737e-06	1.32482e-05
112495	GTF3C6	10087.5	0.806805	0.167181	4.82595	1.39338e-06	1.33945e-05
404266	HOXB-AS3	192.282	10.2458	2.12423	4.82327	1.4122e-06	1.35675e-05
1434	CSE1L	5106.58	-1.02076	0.211657	-4.82272	1.41611e-06	1.35971e-05
10672	GNA13	2394.25	-1.03936	0.215519	-4.82259	1.41709e-06	1.35986e-05
7407	VARS	3127.21	-0.969045	0.201069	-4.81946	1.43947e-06	1.38054e-05
257019	FRMD3	880.947	1.57667	0.327271	4.81762	1.45278e-06	1.3925e-05
25841	ABTB2	485.029	-2.28768	0.474923	-4.81695	1.45769e-06	1.39639e-05
5827	PXMP2	2201.75	1.05928	0.220004	4.8148	1.4735e-06	1.41072e-05
55969	C20orf24	8455.54	0.802735	0.166857	4.81092	1.50238e-06	1.43754e-05
8021	NUP214	967.729	-1.53297	0.318669	-4.81055	1.50516e-06	1.43936e-05
60401	EDA2R	993.283	-1.60182	0.333026	-4.8099	1.51004e-06	1.44319e-05
9531	BAG3	1475.84	-1.33249	0.277081	-4.80903	1.51662e-06	1.44864e-05
4948	OCA2	278.657	2.58471	0.537541	4.8084	1.52144e-06	1.45241e-05
128434	VSTM2L	554.42	2.04908	0.426209	4.80768	1.52691e-06	1.45678e-05
90378	SAMD1	993.151	2.04277	0.424985	4.8067	1.5344e-06	1.46309e-05
6483	ST3GAL2	3911.89	-1.01274	0.210705	-4.80643	1.5365e-06	1.46424e-05
10531	PITRM1	3191.11	-0.94876	0.197419	-4.80582	1.54119e-06	1.46787e-05
2896	GRN	17142.6	-0.785832	0.163569	-4.8043	1.55294e-06	1.4782e-05
114915	EPB41L4A-AS1	1038.74	1.40777	0.293149	4.80222	1.56914e-06	1.49191e-05
3481	IGF2	1698.32	1.19938	0.249751	4.80231	1.56848e-06	1.49191e-05
949	SCARB1	2057.64	-1.214	0.25284	-4.80145	1.57517e-06	1.49678e-05
200162	SPAG17	148.562	5.0482	1.05185	4.79937	1.59167e-06	1.51071e-05
56112	PCDHGA3	157.734	3.81171	0.7942	4.79943	1.59114e-06	1.51071e-05
9706	ULK2	2952.18	-0.977456	0.203678	-4.79903	1.59439e-06	1.51243e-05
6189	RPS3A	36186	0.772305	0.160934	4.79891	1.59535e-06	1.51247e-05
23530	NNT	2281.65	-1.03818	0.216377	-4.79803	1.60234e-06	1.51822e-05
8905	AP1S2	16948.2	0.806569	0.168181	4.79585	1.61989e-06	1.53397e-05
9439	MED23	1069.42	-1.44485	0.301286	-4.79559	1.62194e-06	1.53503e-05
5756	TWF1	3817.91	-0.949654	0.19805	-4.79503	1.62651e-06	1.53847e-05
51634	RBMX2	1273	1.33415	0.27825	4.79479	1.62848e-06	1.53945e-05
8367	HIST1H4E	770.087	1.8234	0.380304	4.7946	1.63e-06	1.54001e-05
85453	TSPYL5	32.7151	-9.1602	1.91069	-4.79419	1.63332e-06	1.54227e-05
134121	C5orf49	513.212	1.93931	0.404642	4.79266	1.64588e-06	1.55324e-05
11143	KAT7	2158.06	-1.26619	0.264411	-4.78872	1.67849e-06	1.58311e-05
10651	MTX2	6478.78	0.924846	0.193235	4.78611	1.70045e-06	1.60291e-05
8409	UXT	3704.91	0.935483	0.195858	4.77634	1.78518e-06	1.68181e-05
642366	LOC642366	117.789	4.48982	0.940359	4.77458	1.80079e-06	1.69556e-05
6660	SOX5	907.142	-1.3806	0.28923	-4.77337	1.81171e-06	1.70486e-05
5441	POLR2L	8749.49	0.835789	0.175131	4.77236	1.82078e-06	1.71242e-05
28971	AAMDC	3504.78	0.984437	0.206302	4.77181	1.82574e-06	1.71611e-05
55737	VPS35	7989.65	-0.985457	0.206578	-4.77039	1.8387e-06	1.72731e-05
1432	MAPK14	2235.33	-1.25285	0.262771	-4.76786	1.86191e-06	1.74812e-05
6897	TARS	5483.15	-0.977482	0.205023	-4.76767	1.86369e-06	1.7488e-05
136895	C7orf31	664.732	1.68196	0.352922	4.76583	1.88082e-06	1.76387e-05
64147	KIF9	778.847	1.47445	0.309412	4.76532	1.8855e-06	1.76726e-05
55603	FAM46A	1336.12	-1.27403	0.267368	-4.76508	1.8878e-06	1.76841e-05
10632	ATP5L	15123.2	0.739667	0.155246	4.76448	1.89342e-06	1.77267e-05
10084	PQBP1	3261.74	0.993098	0.208483	4.76344	1.90318e-06	1.7808e-05
1639	DCTN1	6516.7	-1.03872	0.218095	-4.76272	1.90999e-06	1.78615e-05
5653	KLK6	489.489	2.06882	0.434465	4.76177	1.919e-06	1.79357e-05
5650	KLK7	147.72	3.46158	0.726997	4.76147	1.92184e-06	1.7952e-05
79897	RPP21	2522.31	1.00671	0.211478	4.76037	1.93239e-06	1.80403e-05
84864	RIOX2	1144.87	-1.45859	0.306611	-4.75715	1.96349e-06	1.83204e-05
8515	ITGA10	177.011	-3.37727	0.710636	-4.75246	2.00956e-06	1.87397e-05
83941	TM2D1	4150.56	0.88684	0.186637	4.75167	2.01741e-06	1.88022e-05
84337	ELOF1	4934.96	0.904165	0.190347	4.75008	2.03339e-06	1.89405e-05
84316	NAA38	3194.49	0.962607	0.202736	4.74809	2.05344e-06	1.91165e-05
6827	SUPT4H1	5507.13	0.832534	0.175355	4.74772	2.05723e-06	1.91409e-05
58499	ZNF462	1321.97	1.26296	0.266031	4.74741	2.06033e-06	1.9159e-05
10487	CAP1	12471.8	-0.860213	0.181302	-4.74465	2.08867e-06	1.94007e-05
25840	METTL7A	483.458	-1.85443	0.390842	-4.7447	2.08812e-06	1.94007e-05
51092	SIDT2	889.22	1.63157	0.343958	4.74351	2.10045e-06	1.94991e-05
5136	PDE1A	427.954	1.99721	0.4211	4.74285	2.10727e-06	1.95409e-05
9550	ATP6V1G1	20761.2	0.730873	0.1541	4.74285	2.10731e-06	1.95409e-05
2151	F2RL2	3562.5	-0.988873	0.208516	-4.74242	2.11175e-06	1.9571e-05
80267	EDEM3	2027.51	-1.05068	0.221608	-4.74117	2.12487e-06	1.96816e-05
5230	PGK1	13141.9	-1.00471	0.211964	-4.74001	2.13705e-06	1.97833e-05
728577	CNTNAP3B	921.924	-1.3959	0.294549	-4.73912	2.14652e-06	1.98598e-05
10147	SUGP2	2502.39	-1.03976	0.219602	-4.73474	2.19334e-06	2.02756e-05
11214	AKAP13	2350.2	-1.52854	0.322839	-4.73469	2.19391e-06	2.02756e-05
6176	RPLP1	24165.3	0.781063	0.165066	4.73183	2.22499e-06	2.05513e-05
10505	SEMA4F	1959.66	-1.31663	0.278296	-4.73105	2.23365e-06	2.06198e-05
4238	MFAP3	1689.25	-1.22587	0.259163	-4.73013	2.24379e-06	2.07018e-05
6347	CCL2	2019.26	-1.23532	0.261207	-4.72927	2.25333e-06	2.07782e-05
1588	CYP19A1	175.909	10.11	2.13796	4.72882	2.25826e-06	2.08121e-05
1856	DVL2	2989.9	-1.11978	0.236835	-4.72811	2.26617e-06	2.08733e-05
8434	RECK	3319.35	-1.07336	0.227049	-4.72745	2.27355e-06	2.09296e-05
29100	TMEM208	4613.69	0.858547	0.181662	4.72607	2.28906e-06	2.10606e-05
9969	MED13	1852.61	1.11108	0.235136	4.72529	2.29793e-06	2.11304e-05
27332	ZNF638	3853.99	-0.951209	0.201316	-4.72496	2.30159e-06	2.11524e-05
54969	HPF1	2909.62	1.12521	0.238165	4.72451	2.30676e-06	2.11881e-05
10082	GPC6	2414.83	-1.15497	0.244506	-4.72368	2.31619e-06	2.12629e-05
139341	FUNDC1	2673.72	0.969858	0.2054	4.72181	2.33755e-06	2.1447e-05
81853	TMEM14B	5083.53	0.884618	0.187436	4.71958	2.36328e-06	2.16711e-05
402665	IGLON5	1378.86	1.19945	0.254174	4.71901	2.36995e-06	2.17201e-05
56943	ENY2	11692.9	0.862559	0.182882	4.71649	2.39954e-06	2.19792e-05
286257	C9orf142	1770.37	1.09641	0.232578	4.71417	2.42694e-06	2.22178e-05
51181	DCXR	3428.25	0.936134	0.198602	4.71362	2.43357e-06	2.22662e-05
55033	FKBP14	4857.25	-0.85264	0.180996	-4.71084	2.46703e-06	2.25598e-05
1349	COX7B	14442.9	0.900136	0.191195	4.70795	2.50219e-06	2.28687e-05
23414	ZFPM2	371.739	-2.03696	0.432683	-4.70774	2.50481e-06	2.28799e-05
8655	DYNLL1	39464.5	0.729538	0.155061	4.70485	2.54056e-06	2.31937e-05
10900	RUNDC3A	823.81	1.74484	0.370988	4.70322	2.5609e-06	2.33664e-05
11322	TMC6	2079.6	-1.21342	0.258043	-4.70238	2.57148e-06	2.34501e-05
340277	FAM221A	355.535	2.28558	0.486125	4.70162	2.58101e-06	2.35239e-05
26051	PPP1R16B	177.233	-3.14998	0.670863	-4.69541	2.66067e-06	2.42366e-05
5298	PI4KB	3892.1	-0.879472	0.187336	-4.69462	2.67104e-06	2.43177e-05
2115	ETV1	2771.27	-1.31666	0.280484	-4.69423	2.67614e-06	2.43372e-05
4839	NOP2	832.291	-1.66969	0.355688	-4.69424	2.67604e-06	2.43372e-05
51147	ING4	4484.92	0.92473	0.19701	4.69382	2.68154e-06	2.4373e-05
11328	FKBP9	4283.03	-0.92293	0.196645	-4.69339	2.68716e-06	2.44106e-05
151887	CCDC80	11447.8	-0.784814	0.167228	-4.69307	2.69142e-06	2.44358e-05
3199	HOXA2	2693.9	1.10972	0.236472	4.69282	2.69461e-06	2.44513e-05
91664	ZNF845	217.622	-2.70654	0.576855	-4.69188	2.70701e-06	2.45504e-05
5050	PAFAH1B3	9756.47	0.773755	0.164927	4.6915	2.71208e-06	2.45829e-05
11173	ADAMTS7	2189.19	-1.02134	0.217763	-4.69015	2.73008e-06	2.47324e-05
23516	SLC39A14	1372.37	-1.19469	0.254796	-4.6888	2.74813e-06	2.48824e-05
1153	CIRBP	11889.5	0.756564	0.161371	4.68836	2.75406e-06	2.49224e-05
91392	ZNF502	159.394	9.97507	2.12882	4.68573	2.78962e-06	2.52303e-05
25923	ATL3	302.258	-2.21185	0.472083	-4.6853	2.79546e-06	2.52693e-05
6844	VAMP2	4066.3	0.963908	0.205771	4.68438	2.80812e-06	2.53699e-05
158427	TSTD2	1396.95	-1.22814	0.262243	-4.6832	2.82437e-06	2.55027e-05
2286	FKBP2	4254.92	0.871077	0.186077	4.68126	2.85119e-06	2.57168e-05
6566	SLC16A1	4767.45	-0.890647	0.190258	-4.68126	2.85117e-06	2.57168e-05
4882	NPR2	598.416	1.67779	0.358451	4.68066	2.85946e-06	2.57632e-05
100506548	LOC100506548	1674.56	1.18304	0.252747	4.68072	2.85866e-06	2.57632e-05
100507341	SMIM18	262.25	2.4659	0.527053	4.67867	2.88748e-06	2.60015e-05
65108	MARCKSL1	82498.3	0.673748	0.144067	4.67663	2.91628e-06	2.62466e-05
2651	GCNT2	382.815	2.35496	0.503742	4.67493	2.9406e-06	2.6451e-05
8728	ADAM19	1631.67	-1.13328	0.242458	-4.67411	2.95229e-06	2.65417e-05
4126	MANBA	1125.3	-1.36229	0.291488	-4.67359	2.95985e-06	2.65952e-05
92369	SPSB4	1390.04	1.35597	0.290191	4.67269	2.97274e-06	2.66965e-05
3224	HOXC8	157.15	9.95474	2.13148	4.67034	3.00707e-06	2.69901e-05
9451	EIF2AK3	1527.94	-1.18786	0.254389	-4.66947	3.01984e-06	2.709e-05
55738	ARFGAP1	1823.24	-1.06511	0.228144	-4.6686	3.03253e-06	2.7189e-05
54437	SEMA5B	517.786	1.7343	0.371662	4.66632	3.06641e-06	2.7463e-05
6924	ELOA	2082.26	-1.14736	0.245877	-4.66641	3.06512e-06	2.7463e-05
9419	CRIPT	2611.75	1.00539	0.215499	4.66542	3.0798e-06	2.7568e-05
119032	BORCS7	2862.76	0.968783	0.20792	4.65939	3.17146e-06	2.83731e-05
9823	ARMCX2	2613.61	-1.23498	0.265088	-4.65875	3.18136e-06	2.84462e-05
6729	SRP54	3593	-1.00091	0.214867	-4.65829	3.18843e-06	2.8494e-05
7071	KLF10	2697.99	-0.974614	0.209336	-4.65573	3.22834e-06	2.8835e-05
288	ANK3	1300.09	1.18408	0.254499	4.65258	3.27803e-06	2.92473e-05
64949	MRPS26	5367.31	0.823763	0.177055	4.6526	3.27781e-06	2.92473e-05
23642	SNHG1	938.962	1.42244	0.305744	4.65241	3.28084e-06	2.92565e-05
7343	UBTF	2632.42	-0.996281	0.214192	-4.65134	3.29793e-06	2.93931e-05
84418	CYSTM1	2854.83	1.01291	0.217821	4.65021	3.31603e-06	2.95384e-05
9690	UBE3C	1684.39	-1.0798	0.232212	-4.65003	3.31881e-06	2.95472e-05
8045	RASSF7	660.378	1.66061	0.357294	4.64773	3.356e-06	2.98622e-05
282809	POC1B	1546.55	-1.10782	0.238367	-4.64753	3.35927e-06	2.98752e-05
64778	FNDC3B	6353.93	-0.96455	0.207577	-4.64671	3.37263e-06	2.99779e-05
10401	PIAS3	3378.16	-1.00467	0.216228	-4.64636	3.3784e-06	3.0013e-05
51390	AIG1	1433.46	1.15089	0.247762	4.64512	3.39875e-06	3.01776e-05
10432	RBM14	3420.18	-1.01064	0.217582	-4.64489	3.4026e-06	3.01956e-05
85460	ZNF518B	1309.38	-1.17176	0.252289	-4.6445	3.40896e-06	3.02358e-05
10186	LHFP	5633.21	-1.07382	0.231255	-4.64344	3.42659e-06	3.03758e-05
55845	BRK1	17160.1	0.721228	0.155406	4.64092	3.46856e-06	3.07228e-05
3930	LBR	5989.47	-0.811292	0.174815	-4.64087	3.46946e-06	3.07228e-05
54521	WDR44	854.357	-1.47406	0.317663	-4.64033	3.47861e-06	3.07874e-05
1212	CLTB	5578.93	0.830742	0.179043	4.63991	3.48563e-06	3.08277e-05
10399	RACK1	34374.1	0.705433	0.152038	4.63983	3.4869e-06	3.08277e-05
9921	RNF10	10988.3	-0.794595	0.171274	-4.63933	3.49548e-06	3.08871e-05
7289	TULP3	2491.69	-0.958549	0.206639	-4.63876	3.50512e-06	3.09483e-05
5429	POLH	806.338	-1.81344	0.390937	-4.63869	3.50616e-06	3.09483e-05
3716	JAK1	4193.57	-1.0323	0.222568	-4.63813	3.51583e-06	3.10171e-05
23310	NCAPD3	1050.92	-1.31727	0.284066	-4.6372	3.53156e-06	3.11392e-05
8914	TIMELESS	2477.93	-1.13312	0.2444	-4.63634	3.54635e-06	3.12529e-05
4731	NDUFV3	3127.07	0.946067	0.204067	4.63607	3.55098e-06	3.1277e-05
3956	LGALS1	9259.01	0.946383	0.204193	4.63474	3.57383e-06	3.14615e-05
3192	HNRNPU	12303.6	-0.829382	0.179044	-4.63227	3.61678e-06	3.18227e-05
255520	ELMOD2	1716.26	-1.12932	0.243803	-4.6321	3.61974e-06	3.18318e-05
79816	TLE6	165.796	3.18388	0.687544	4.6308	3.64254e-06	3.20152e-05
54867	TMEM214	3056.49	-1.00955	0.218022	-4.63052	3.64757e-06	3.20424e-05
11196	SEC23IP	2305.52	-1.0998	0.237542	-4.62991	3.65825e-06	3.21191e-05
26224	FBXL3	1982.97	-1.03044	0.222697	-4.62709	3.70844e-06	3.25424e-05
55037	PTCD3	2600.71	-1.05562	0.228183	-4.6262	3.72434e-06	3.26647e-05
131034	CPNE4	272.345	2.44019	0.527631	4.62481	3.74948e-06	3.28437e-05
56917	MEIS3	8965.1	0.823563	0.178077	4.62475	3.75051e-06	3.28437e-05
93380	MMGT1	1268.33	-1.22861	0.265661	-4.62474	3.75072e-06	3.28437e-05
388815	MIR99AHG	1024.91	1.3919	0.301032	4.62376	3.76849e-06	3.29817e-05
6869	TACR1	161.871	3.65597	0.791087	4.62145	3.81071e-06	3.33203e-05
4001	LMNB1	1552.74	-1.65543	0.358209	-4.62142	3.81121e-06	3.33203e-05
8204	NRIP1	7592.51	-0.767727	0.166167	-4.62021	3.83361e-06	3.34807e-05
23385	NCSTN	9732.16	-0.769648	0.16658	-4.62029	3.83195e-06	3.34807e-05
6376	CX3CL1	714.306	-1.48165	0.320708	-4.61995	3.83839e-06	3.35048e-05
7358	UGDH	8984.97	-0.757807	0.164048	-4.61943	3.84801e-06	3.3571e-05
4171	MCM2	3142.46	-1.03708	0.224533	-4.61881	3.8595e-06	3.36534e-05
79892	MCMBP	3728.4	-1.07251	0.232277	-4.61735	3.88673e-06	3.3873e-05
83541	FAM110A	584.703	1.67091	0.361919	4.6168	3.89693e-06	3.39261e-05
2892	GRIA3	425.401	-1.83812	0.398131	-4.61689	3.89539e-06	3.39261e-05
9520	NPEPPS	5775.9	-0.818287	0.177286	-4.61564	3.91894e-06	3.40928e-05
7042	TGFB2	2786.33	-1.00856	0.218512	-4.61557	3.92021e-06	3.40928e-05
1029	CDKN2A	283.663	-2.18316	0.473126	-4.61434	3.94351e-06	3.42774e-05
405	ARNT	1684.72	-1.19183	0.258385	-4.61261	3.97641e-06	3.45452e-05
2318	FLNC	1639.58	-1.24928	0.270869	-4.61213	3.98562e-06	3.4607e-05
3690	ITGB3	657.846	-2.05352	0.445439	-4.6101	4.02481e-06	3.49289e-05
6187	RPS2	56308.4	0.686637	0.148951	4.60981	4.03032e-06	3.49584e-05
57488	ESYT2	2293.94	-1.19106	0.258505	-4.60748	4.07571e-06	3.53335e-05
163782	KANK4	927.579	-1.62803	0.35356	-4.60467	4.13111e-06	3.5795e-05
55163	PNPO	103.594	5.87932	1.2769	4.60437	4.13712e-06	3.58283e-05
8859	STK19	1435.94	1.13312	0.246273	4.60106	4.20354e-06	3.63463e-05
100885776	UGDH-AS1	2131.5	1.13123	0.245856	4.60118	4.20095e-06	3.63463e-05
79081	LBHD1	3274.66	0.914222	0.198698	4.60107	4.20325e-06	3.63463e-05
4013	VWA5A	1636.7	-1.27469	0.277159	-4.59914	4.24242e-06	3.66633e-05
4675	NAP1L3	3212.83	-1.00309	0.21822	-4.59667	4.29289e-06	3.708e-05
4552	MTRR	899.353	-1.53123	0.333162	-4.59606	4.30557e-06	3.71701e-05
56061	UBFD1	4604.58	-0.943534	0.205482	-4.59181	4.3942e-06	3.78759e-05
124454	EARS2	1221.58	-1.25321	0.27292	-4.59188	4.3928e-06	3.78759e-05
2065	ERBB3	951.582	-1.83042	0.398622	-4.59186	4.39304e-06	3.78759e-05
4676	NAP1L4	7753.19	-0.822511	0.179275	-4.58799	4.47541e-06	3.85558e-05
411	ARSB	2197.62	-1.00731	0.219578	-4.58746	4.48665e-06	3.86324e-05
8989	TRPA1	29.8454	-9.02774	1.96851	-4.58608	4.51649e-06	3.88691e-05
339390	CLEC4G	143.892	9.82742	2.14299	4.58584	4.52173e-06	3.88819e-05
55351	STK32B	277.305	-2.3671	0.51618	-4.58579	4.52269e-06	3.88819e-05
1385	CREB1	3596.64	-0.921873	0.201083	-4.58453	4.55003e-06	3.90966e-05
29080	CCDC59	1454.53	1.14482	0.249766	4.58358	4.57084e-06	3.9255e-05
6389	SDHA	5039.77	-0.854898	0.186666	-4.57982	4.65375e-06	3.99463e-05
54662	TBC1D13	3740.57	-0.923269	0.201676	-4.57799	4.69474e-06	4.02772e-05
79012	CAMKV	790.774	1.49905	0.327511	4.57709	4.71496e-06	4.04297e-05
55851	PSENEN	6695.25	0.833134	0.182068	4.57595	4.74065e-06	4.06288e-05
4534	MTM1	474.174	-2.19658	0.480246	-4.57387	4.788e-06	4.10134e-05
9820	CUL7	2346.61	-1.22494	0.267914	-4.57215	4.82756e-06	4.13309e-05
51093	RRNAD1	523.74	1.68768	0.369282	4.57017	4.87333e-06	4.1701e-05
10521	DDX17	5077.15	-0.895868	0.196032	-4.57001	4.87709e-06	4.17116e-05
83643	CCDC3	922.163	-1.50587	0.329629	-4.56836	4.91553e-06	4.20186e-05
83700	JAM3	8040.58	-0.907767	0.198807	-4.56607	4.96953e-06	4.24582e-05
100130958	SYCE1L	285.801	2.25917	0.495015	4.56384	5.02258e-06	4.28893e-05
57541	ZNF398	825.144	-1.3679	0.299734	-4.56372	5.0254e-06	4.28912e-05
54510	PCDH18	9415.78	-0.793524	0.174007	-4.5603	5.10797e-06	4.35734e-05
79674	VEPH1	432.219	1.97117	0.432426	4.55841	5.15429e-06	4.39459e-05
10465	PPIH	2417.43	0.978929	0.214763	4.55819	5.15972e-06	4.39694e-05
5101	PCDH9	6304.57	-0.784955	0.172212	-4.55807	5.16255e-06	4.39709e-05
2923	PDIA3	51140.8	-0.846753	0.185843	-4.55628	5.20674e-06	4.43244e-05
3202	HOXA5	137.862	9.7657	2.14355	4.55586	5.21708e-06	4.43895e-05
55744	COA1	7736.42	0.770437	0.169132	4.55525	5.2323e-06	4.44961e-05
54998	AURKAIP1	6331.21	0.78809	0.173034	4.55453	5.2502e-06	4.46253e-05
201626	PDE12	518.155	-1.6463	0.361475	-4.55439	5.25382e-06	4.46332e-05
64689	GORASP1	2514.28	-0.987535	0.216919	-4.55255	5.30001e-06	4.50024e-05
122704	MRPL52	4593.64	0.830057	0.18234	4.55226	5.30735e-06	4.50416e-05
2588	GALNS	1189.28	-1.2112	0.266373	-4.54702	5.44108e-06	4.61528e-05
139411	PTCHD1	183.428	-2.84987	0.626797	-4.54673	5.44859e-06	4.61928e-05
57198	ATP8B2	1767.98	-1.24976	0.274876	-4.54662	5.45139e-06	4.61928e-05
10788	IQGAP2	1428.41	-1.19801	0.263519	-4.54619	5.46263e-06	4.62643e-05
25847	ANAPC13	12454.1	0.885522	0.194926	4.54286	5.54954e-06	4.69763e-05
53373	TPCN1	833.517	-1.89623	0.417431	-4.54262	5.55594e-06	4.70063e-05
10382	TUBB4A	1671.74	1.18249	0.260424	4.54063	5.60869e-06	4.74283e-05
51503	CWC15	7944.34	0.878619	0.193519	4.54023	5.61942e-06	4.74947e-05
84656	GLYR1	2182.97	-1.19604	0.263518	-4.53876	5.65857e-06	4.78012e-05
153527	ZMAT2	3495.62	0.897343	0.197729	4.53824	5.67248e-06	4.78942e-05
10802	SEC24A	1518.33	-1.25313	0.276215	-4.53677	5.7122e-06	4.82049e-05
10801	2020-09-09	4723.04	-0.888572	0.195904	-4.53576	5.73968e-06	4.84121e-05
645212	EIF3J-AS1	1333.92	1.22084	0.26923	4.53458	5.77172e-06	4.86574e-05
128240	NAXE	8149.48	0.762498	0.168165	4.53423	5.78129e-06	4.87132e-05
100507602	TRIM52-AS1	2036.14	1.02379	0.225803	4.53399	5.78803e-06	4.87452e-05
22954	TRIM32	1587.5	-1.20126	0.264966	-4.53364	5.7975e-06	4.88001e-05
115106	HAUS1	5511.79	0.82268	0.181502	4.53263	5.82544e-06	4.90102e-05
221395	ADGRF5	156.241	-3.28483	0.724733	-4.53246	5.82999e-06	4.90236e-05
80097	MZT2B	7584.99	0.784294	0.173045	4.5323	5.83438e-06	4.90355e-05
85369	STRIP1	2182.15	-1.16977	0.258131	-4.5317	5.85119e-06	4.91518e-05
56134	PCDHAC2	333.744	-2.17924	0.480912	-4.53148	5.85706e-06	4.91761e-05
114904	C1QTNF6	1524.98	-1.08515	0.239514	-4.53066	5.87996e-06	4.93432e-05
5099	PCDH7	4901.28	-0.869703	0.192225	-4.5244	6.05668e-06	5.08004e-05
374659	HDDC3	1020.88	1.27375	0.28154	4.52421	6.06214e-06	5.08027e-05
10482	NXF1	2765.43	-0.983006	0.217278	-4.52418	6.0631e-06	5.08027e-05
2342	FNTB	325.039	-2.09285	0.462617	-4.52393	6.07017e-06	5.08361e-05
100534599	ISY1-RAB43	1188.5	-1.25648	0.277787	-4.52317	6.09215e-06	5.09943e-05
23473	CAPN7	1552.03	-1.41279	0.312374	-4.52276	6.10393e-06	5.10671e-05
29766	TMOD3	4151.02	-0.901371	0.199366	-4.52119	6.14927e-06	5.14012e-05
4087	SMAD2	4249.24	-1.14887	0.254109	-4.52116	6.15009e-06	5.14012e-05
9632	SEC24C	3421.82	-0.961849	0.212804	-4.51988	6.18761e-06	5.16886e-05
94274	PPP1R14A	298.083	2.18376	0.4832	4.51936	6.20262e-06	5.17878e-05
522	ATP5J	14232.8	0.814846	0.180325	4.51878	6.21983e-06	5.18791e-05
8829	NRP1	1103.16	-1.6669	0.368877	-4.51887	6.21717e-06	5.18791e-05
4909	NTF4	340.504	2.04157	0.45186	4.51815	6.23819e-06	5.20059e-05
5870	RAB6A	10011.6	-0.750499	0.166131	-4.51751	6.25724e-06	5.21384e-05
9855	FARP2	470.213	-1.86363	0.412689	-4.51582	6.30721e-06	5.25283e-05
23300	ATMIN	4477.97	-0.983529	0.217833	-4.51506	6.32989e-06	5.26906e-05
726	CAPN5	1627.88	-1.19835	0.265439	-4.5146	6.34364e-06	5.27784e-05
3005	H1F0	2834.27	0.930682	0.206196	4.51357	6.37449e-06	5.30084e-05
6204	RPS10	14265.8	0.719047	0.159356	4.51219	6.41614e-06	5.33069e-05
166336	PRICKLE2	765.081	-1.47896	0.327771	-4.51217	6.41684e-06	5.33069e-05
25896	INTS7	1067.63	-1.44213	0.319782	-4.50974	6.49078e-06	5.38941e-05
55959	SULF2	4853.76	-0.806484	0.178844	-4.50943	6.50006e-06	5.3944e-05
51023	MRPS18C	4425.7	0.88068	0.195306	4.50923	6.50629e-06	5.39686e-05
78988	MRPL57	5898.61	0.82344	0.182629	4.5088	6.51952e-06	5.40512e-05
57689	LRRC4C	273.377	-2.26194	0.501695	-4.50859	6.52587e-06	5.40766e-05
256435	ST6GALNAC3	4604.71	-0.862323	0.191321	-4.50722	6.56839e-06	5.44016e-05
25912	C1orf43	12529.1	0.776242	0.172259	4.50625	6.59832e-06	5.46222e-05
475	ATOX1	7314.63	0.788985	0.175113	4.50557	6.61935e-06	5.47688e-05
5878	RAB5C	2259.09	-1.10375	0.244987	-4.50535	6.62628e-06	5.47987e-05
25864	ABHD14A	3421.43	1.00592	0.223404	4.5027	6.70967e-06	5.54606e-05
[truncated: 17,970 more rows]
