# Supplementary material for: Altered temporal sequence of transcriptional regulators in the generation of human cerebellar granule cells
Source: eLife. 2021 Nov 29;10:e67074. doi: 10.7554/eLife.67074 (PMC8687658; doi:10.7554/eLife.67074)
Supplement: Figure 4—source data 2. [file elife-67074-fig4-data2.xlsx]

## Sheet: Sheet1
Comparison of ATOH1-EGFP TRAP IP versus human developmental data from the PsychEncode project
Sample	Stat	Pvalue	AdjPvalue	Region	Days	Age
HSB113.CBC	3.48543e+06	0.993507	1	CBC	84	12 PCW
HSB150.CBC	3623785	0.860038	1	CBC	84	12 PCW
HSB103.CBC	3.9862e+06	0.00471048	0.122473	CBC	91	13 PCW
HSB149.CBC	4.56786e+06	9.68071e-18	2.51698e-16	CBC	91	13 PCW
HSB178.CBC	4507365	1.58753e-15	4.12759e-14	CBC	112	16 PCW
HSB97.CBC	4.09113e+06	0.000125638	0.0032666	CBC	119	17 PCW
HSB107.CBC	3.55761e+06	0.960099	1	CBC	147	21 PCW
HSB92.CBC	3.81335e+06	0.199699	1	CBC	147	21 PCW
HSB159.CBC	3.80688e+06	0.218564	1	CBC	154	22 PCW
HSB194.CBC	4.24014e+06	1.15364e-07	2.99947e-06	CBC	259	37 PCW
HSB132.CBC	3.67503e+06	0.712452	1	CBC	388	4 M
HSB139.CBC	3914731	0.0306527	0.79697	CBC	388	4 M
HSB113.MD	3097898	1	1	MD	84	12 PCW
HSB150.MD	3.30085e+06	0.999993	1	MD	84	12 PCW
HSB153.MD	3319742	0.999984	1	MD	84	12 PCW
HSB149.MD	3674567	0.71406	1	MD	91	13 PCW
HSB154.MD	3173341	1	1	MD	112	16 PCW
HSB178.MD	3.71785e+06	0.550179	1	MD	112	16 PCW
HSB96.MD	3766162	0.357933	1	MD	112	16 PCW
HSB97.MD	3874169	0.072177	1	MD	119	17 PCW
HSB98.MD	3.73189e+06	0.493486	1	MD	133	19 PCW
HSB107.MD	3604346	0.899323	1	MD	147	21 PCW
HSB92.MD	4.02548e+06	0.00137282	0.0356933	MD	147	21 PCW
HSB159.MD	3.95889e+06	0.0101898	0.264935	MD	154	22 PCW
HSB132.MD	3.63029e+06	0.844818	1	MD	388	4 M
HSB139.MD	3.81887e+06	0.18439	1	MD	388	4 M
Abbreviations:
CBC= cerebellum
MD= midbrain
PCW= post coitus week
M= postnatal month
