# Supplementary material for: Altered temporal sequence of transcriptional regulators in the generation of human cerebellar granule cells
Source: eLife. 2021 Nov 29;10:e67074. doi: 10.7554/eLife.67074 (PMC8687658; doi:10.7554/eLife.67074)
Supplement: Supplementary file 1. [file elife-67074-supp1.xlsx]

## Sheet: TRAP versus input
GO ID	GO term	Annotated	Significant	Expected	Rank in result	Classic	Elim	Weight
GO:0006613	cotranslational protein targeting to membrane	96	87	28.02	1	< 1e-30	< 1e-30	0.02662	7.5e-14
GO:0000184	nuclear-transcribed mRNA catabolic proce...	119	98	34.74	2	< 1e-30	< 1e-30	< 1e-30	2.2e-07
GO:0019080	viral gene expression	186	123	54.3	3	1.2e-25	4.8e-28	0.01712	6.4e-14
GO:0019058	viral life cycle	447	228	130.49	4	8.7e-23	9.9e-24	6.8e-25	3.2e-08
GO:0044033	multi-organism metabolic process	212	131	61.89	5	4.1e-23	4.1e-23	4.1e-23	1.5e-20
GO:0006412	translation	619	308	180.7	6	4.7e-28	1.1e-21	0.04048	2.1e-20
GO:0006364	rRNA processing	253	148	73.86	7	1.5e-22	1.4e-21	4.6e-15	8.3e-07
GO:0006119	oxidative phosphorylation	118	81	34.45	8	7.2e-19	7.2e-19	0.01614	1.8e-14
GO:0044764	multi-organism cellular process	952	395	277.91	9	5e-17	5.8e-17	5e-17	8.6e-16
GO:0033108	mitochondrial respiratory chain complex ...	83	57	24.23	10	1.1e-13	1.1e-13	0.00102	1.6e-08
GO:0000398	mRNA splicing, via spliceosome	309	145	90.2	11	2.3e-11	2.7e-10	6.9e-07	0.00052
GO:0007411	axon guidance	221	112	64.51	12	1.2e-11	7.5e-10	2.4e-08	0.00088
GO:0051649	establishment of localization in cell	2046	845	597.26	13	< 1e-30	8e-10	0.03914	6.5e-21
GO:0030198	extracellular matrix organization	313	148	91.37	14	7.1e-12	3e-09	2.5e-08	0.0027
GO:0051961	negative regulation of nervous system de...	256	124	74.73	15	5e-11	7.2e-09	0.0078	4.2e-05
GO:1903047	mitotic cell cycle process	900	367	262.73	16	1.5e-14	1.3e-08	0.00016	0.00024
GO:0071363	cellular response to growth factor stimu...	617	264	180.11	17	1.7e-13	1.3e-08	0.00278	1.5e-08
GO:0009952	anterior/posterior pattern specification	202	99	58.97	18	2e-09	1.6e-08	2e-09	0.00896
GO:0007417	central nervous system development	895	363	261.27	19	5.2e-14	2e-08	0.00011	1.6e-05
GO:0072594	establishment of protein localization to...	657	311	191.79	20	1e-23	2.7e-08	0.00302	1e-08
GO:0006914	autophagy	448	193	130.78	21	1.7e-10	2.7e-08	0.049	0.01591
GO:0048706	embryonic skeletal system development	122	67	35.61	22	2.3e-09	6.5e-08	0.02204	0.00069
GO:0042274	ribosomal small subunit biogenesis	64	39	18.68	23	1.3e-07	1.3e-07	0.23874	0.07409
GO:0016055	Wnt signaling pathway	469	192	136.91	24	2.4e-08	1.7e-07	0.02202	0.0083
GO:0048705	skeletal system morphogenesis	209	103	61.01	25	6.3e-10	3.4e-07	0.06834	0.00224
GO:0048193	Golgi vesicle transport	331	151	96.62	26	1.2e-10	3.8e-07	0.00972	4.4e-05
GO:0043066	negative regulation of apoptotic process	808	311	235.87	27	3.7e-09	5.4e-07	0.00066	0.03687
GO:0042273	ribosomal large subunit biogenesis	60	36	17.52	28	6.6e-07	6.6e-07	0.03329	0.11008
GO:0043161	proteasome-mediated ubiquitin-dependent ...	376	155	109.76	29	3.2e-07	8.8e-07	0.39402	0.01383
GO:0051301	cell division	563	229	164.35	30	2.1e-09	1.2e-06	1.8e-07	1.5e-08
GO:0001764	neuron migration	136	66	39.7	31	1.4e-06	1.5e-06	3.8e-05	0.00472
GO:0010628	positive regulation of gene expression	1723	596	502.98	32	1.6e-07	1.7e-06	0.00016	0.24635
GO:0032392	DNA geometric change	84	45	24.52	33	2.4e-06	2.4e-06	0.13488	0.00032
GO:0036293	response to decreased oxygen levels	340	140	99.25	34	1.3e-06	2.4e-06	0.17545	0.37417
GO:0060322	head development	705	286	205.8	35	2.8e-11	2.8e-06	0.03897	3.2e-06
GO:0007041	lysosomal transport	82	44	23.94	36	2.9e-06	2.9e-06	0.00365	0.62205
GO:0001503	ossification	372	162	108.59	37	1.9e-09	3e-06	0.0003	2.1e-09
GO:0061548	ganglion development	13	12	3.79	38	3.6e-06	3.6e-06	0.49797	2.4e-05
GO:0051170	import into nucleus	291	123	84.95	39	1.1e-06	3.7e-06	0.00172	0.29048
GO:0014812	muscle cell migration	74	40	21.6	40	6.4e-06	4e-06	0.00367	0.00092
GO:2000058	regulation of ubiquitin-dependent protei...	207	91	60.43	41	4e-06	7.3e-06	0.08417	0.01815
GO:0000291	nuclear-transcribed mRNA catabolic proce...	35	23	10.22	42	8.1e-06	8.1e-06	0.49757	0.70948
GO:0007169	transmembrane receptor protein tyrosine ...	680	259	198.5	43	2.2e-07	8.4e-06	0.00012	0.68296
GO:0048666	neuron development	973	393	284.04	44	9e-15	1.1e-05	0.00663	0.00012
GO:0033554	cellular response to stress	1801	689	525.74	45	1.2e-18	1.4e-05	0.00062	9.5e-22
GO:0002062	chondrocyte differentiation	96	49	28.02	46	5.4e-06	1.4e-05	0.00037	9e-05
GO:0043065	positive regulation of apoptotic process	572	221	166.98	47	5.1e-07	1.6e-05	3.2e-05	0.07929
GO:0043583	ear development	204	89	59.55	48	7.3e-06	1.8e-05	0.00237	0.06719
GO:0070849	response to epidermal growth factor	43	26	12.55	49	1.9e-05	1.9e-05	0.00719	0.00054
GO:1903321	negative regulation of protein modificat...	144	66	42.04	50	1.6e-05	2.4e-05	0.01415	0.00131
